1  
2 **Radiation of nitrogen-metabolizing enzymes across the tree of life tracks**  
3 **environmental transitions in Earth history**

4  
5 Chris Parsons<sup>1,2</sup>, Eva Stüeken<sup>3,4</sup>, Caleb Rosen<sup>1</sup>, Katherine Mateos<sup>1</sup> and Rika Anderson<sup>1,4</sup>

6  
7 <sup>1</sup> *Carleton College, Northfield, MN, USA*

8 <sup>2</sup> *Massachusetts Institute of Technology, Cambridge, MA, USA*

9 <sup>3</sup> *University of St. Andrews, St. Andrews, Scotland, UK*

10 <sup>4</sup> *NASA NExSS Virtual Planetary Laboratory, University of Washington, Box 351580, Seattle,*  
11 *USA*

12  
13 **Abstract**

14  
15 Nitrogen is an essential element to life and exerts a strong control on global biological  
16 productivity. The rise and spread of nitrogen-utilizing microbial metabolisms profoundly shaped  
17 the biosphere on the early Earth. Here we reconciled gene and species trees to identify birth and  
18 horizontal gene transfer events for key nitrogen-cycling genes, dated with a time-calibrated tree  
19 of life, in order to examine the timing of the proliferation of these metabolisms across the tree of  
20 life. Our results provide new insights into the evolution of the early nitrogen cycle that expand  
21 on geochemical reconstructions. We observed widespread horizontal gene transfer of  
22 molybdenum-based nitrogenase back to the Archean, minor horizontal transfer of genes for  
23 nitrate reduction in the Archean, and an increase in the proliferation of genes metabolizing nitrite  
24 around the time of the Mesoproterozoic (~1.5 Ga). The latter coincides with recent geochemical  
25 evidence for a mid-Proterozoic rise in oxygen levels. Geochemical evidence of biological nitrate  
26 utilization in the Archean and early Proterozoic may reflect at least some contribution of  
27 dissimilatory nitrate reduction to ammonium (DNRA) rather than pure denitrification to N<sub>2</sub>. Our  
28 results thus help unravel the relative dominance of two metabolic pathways that are not  
29 distinguishable with current geochemical tools. Overall, our findings thus provide novel  
30 constraints for understanding the evolution of the nitrogen cycle over time and provide insights  
31 into the bioavailability of various nitrogen sources in the early Earth with possible implications  
32 for the emergence of eukaryotic life.

33  
34  
35 **Keywords:** nitrogen cycle; horizontal gene transfer; denitrification; microbial evolution;  
36 nitrogenase

37  
38



## 39 Introduction

40 Nitrogen is a critical element to life on Earth, important as an essential building block in  
41 the synthesis of biological molecules, and for its role in redox reactions for microbial energy  
42 metabolism. It is often a limiting nutrient in marine and terrestrial environments and likely had a  
43 significant influence on the evolutionary trajectory of the biosphere over Earth's history. The  
44 nitrogen cycle is largely controlled by a variety of microorganisms that enzymatically catalyze  
45 the reduction and oxidation of nitrogen at various redox states (Figure 1). Reconstructing the  
46 genetic proliferation of these enzymes across the tree of life through gene birth, duplication, loss,  
47 and horizontal gene transfer can therefore provide novel insights into the evolution of the  
48 biosphere and its productivity over time.

49 The most important steps in Earth's nitrogen cycle are largely catalyzed by microbes,  
50 including the first crucial step of reducing molecular nitrogen to bioavailable forms (Zerkle &  
51 Mikhail, 2017; Kuypers *et al.*, 2018). Nitrogen fixation is catalyzed by nitrogenase, of which  
52 there are three varieties, distinguished by the metals in their associated active site cofactors: Nif  
53 (Fe-Mo), Vnf (Fe-V), and Anf (Fe-Fe) (Joerger *et al.*, 1988; Miller & Eady, 1988) (Figure 1).  
54 The ability to fix nitrogen is spread across a wide range of archaeal and bacterial lineages, but  
55 does not occur in eukaryotes (Dos Santos *et al.*, 2012; Gaby & Buckley, 2014). Importantly,  
56 nitrogenase is strongly inhibited by oxygen, forcing nitrogen fixers to develop various means to  
57 reduce their intracellular oxygen concentrations or to confine themselves to suboxic  
58 environments (Gallon, 1981). Ammonium produced from nitrogen fixation or ammonification is  
59 converted to organic forms of fixed nitrogen by a variety of enzymes or, in the presence of  
60 oxygen, oxidized to nitrite ( $\text{NO}_2^-$ ) or nitrate ( $\text{NO}_3^-$ ) through the chemoautotrophic nitrification  
61 pathway via the enzymes Amo and Hao (Figure 1). In environments with insufficient  $\text{O}_2$   
62 concentrations to support aerobic respiration, nitrate and nitrite can be utilized as alternative  
63 terminal electron acceptors through the denitrification pathway; consequently, denitrification  
64 rates are highest in suboxic conditions, including swamps and marine oxygen minimum zones  
65 (Canfield *et al.*, 2005; Löscher *et al.*, 2012; Voss *et al.*, 2013). Reduction of nitrate to nitrite,  
66 nitric oxide (NO), nitrous oxide ( $\text{N}_2\text{O}$ ) and dinitrogen ( $\text{N}_2$ ) is catalyzed by the Nas, Nar, Nap,  
67 Nir, Nor, and Nos enzymes, respectively. Dissimilatory nitrate reduction to ammonium (DNRA)  
68 also reduces nitrate via the enzymes Nar, Nap, Nir and Nrf (Figure 1), but this pathway retains  
69 fixed nitrogen as ammonium and may therefore have been a critical metabolism in nutrient-

70 starved ecosystems. DNRA, while less understood than denitrification, has been shown to be a  
71 major nitrate sink in a variety of aquatic systems, especially warm intertidal zones (Giblin *et al.*,  
72 2013) and it may be dominant under ferruginous conditions, as suggested by modern analogue  
73 studies (Michiels *et al.*, 2017).

74         Given the importance of nitrogen as a building block of life, as an energy source for  
75 microbes, and as the most abundant element in the Earth's atmosphere, better constraining the  
76 evolutionary history of the nitrogen cycle is important for understanding, among other things,  
77 variation in global primary productivity and atmospheric pressure over time. The bioavailability  
78 and cycling of important limiting nutrients through Earth's history, including nitrogen, would  
79 have been important for biological productivity and the rise of early eukaryotic algae (Anbar &  
80 Knoll, 2002; Sánchez-Baracaldo *et al.*, 2014; Isson *et al.*, 2018). The relative abundance of  
81 nitrogenous gases in the atmosphere could also have had important implications for atmospheric  
82 pressure as well as planetary climate during the Archean. Potential changes in atmospheric  
83 pressure during the Archean may have resulted from biological N<sub>2</sub> drawdown (Som *et al.*, 2016),  
84 whereas the greenhouse gas nitrous oxide (N<sub>2</sub>O), produced as part of the nitrogen cycle via  
85 nitrification/denitrification, may have contributed to planetary warming when the Sun was  
86 younger and fainter (Buick, 2007; Roberson *et al.*, 2011; Stanton *et al.*, 2018). Finally, one of the  
87 most important questions for the early evolution of life is understanding when fixed nitrogen first  
88 became widely available, and through what means. Experimental data suggest that fixed nitrogen  
89 can be produced during lightning reactions and under hydrothermal conditions (e.g., Brandes *et al.*  
90 *et al.*, 1998; Navarro-González *et al.*, 2001), and either or both of these sources were likely pivotal  
91 for the origin of life. However, the invention of biological N<sub>2</sub> fixation would have made Earth's  
92 biosphere less dependent on abiotic reactions and likely spurred primary productivity.

93         The question of how these metabolisms unfolded over Earth's history has previously  
94 been addressed with both geochemical and phylogenetics-based approaches. Geochemical  
95 approaches, relying on the reconstruction of metabolisms based on the rock record, have  
96 suggested that biological nitrogen fixation emerged early (Stüeken *et al.*, 2016a; Koehler *et al.*,  
97 2019; Ossa Ossa *et al.*, 2019) and that the nitrogen cycle expanded considerably during the  
98 Neoproterozoic (2.8-2.5 Ga) and Paleoproterozoic (2.5-1.8 Ga) (Garvin *et al.*, 2009a; Godfrey &  
99 Falkowski, 2009; Zerkle *et al.*, 2017a; Kipp *et al.*, 2018; Koehler *et al.*, 2018; Luo *et al.*, 2018).  
100 Phylogenetics studies, relying on sequence data, reconstruct the evolutionary history of genes of

101 interest (e.g. Jones *et al.*, 2008; Boyd *et al.*, 2011b; Garcia *et al.*, 2020), and some molecular  
102 clock studies have yielded conservative estimates for the approximate timing of an enzyme's  
103 origin (Raymond *et al.*, 2004; Boyd *et al.*, 2011b; Boyd & Peters, 2013). While each approach  
104 provides valuable insights, they both have weaknesses. Geochemical data cannot reliably  
105 distinguish between all enzymatic pathways, because the isotopic effects of some reactions (e.g.,  
106 denitrification, DNRA and ANAMMOX) are too similar to each other. Furthermore,  
107 geochemical data, which are typically collected from bulk rock samples, only preserve evidence  
108 of the most dominant metabolisms and may therefore not capture the origin of new enzymes  
109 until they gain ecological significance. Conversely, the phylogenetic approach of dating the  
110 antiquity of enzymes does not show when these enzymes gained ecological dominance.  
111 Furthermore, most phylogenetic studies have so far focused on nitrogenase, leaving the  
112 evolutionary history of most nitrogen-cycling enzymes poorly constrained. Additional work is  
113 therefore needed to address key questions about the dynamics of the nitrogen cycle on the early  
114 Earth and its evolution over time. The proliferation of sequencing data over the past decade has  
115 made vast amounts of genomic data available, which can provide novel insights into the  
116 evolution of nitrogen cycling genes over time.

117 As a new approach to these questions, we track the timing of birth, speciation,  
118 duplication, loss, and horizontal gene transfer events for genes involved in each step of the  
119 nitrogen cycle, which can provide contextual information for the rise and spread of key nitrogen-  
120 cycling genes across the tree of life. We place particular focus on the acquisition of new genes  
121 via horizontal gene transfer (HGT), which is common in microbial lineages and is a crucial  
122 evolutionary mechanism by which a clade of organisms can develop new and useful phenotypes  
123 without the evolutionary cost associated with independently evolving genes (Beiko *et al.*, 2005;  
124 Gogarten & Townsend, 2005). Studies of gene gain and loss have revealed a history of  
125 widespread HGT throughout the microbial tree of life, which we have attempted to leverage as a  
126 means to attribute trends in microbial evolution to events in Earth history (Koonin *et al.*, 2001;  
127 Mirkin *et al.*, 2003). Many of the major genes in the nitrogen cycle have been shown to have  
128 experienced extensive HGT, presumably due to their modularity and their strong dependence on  
129 oxygen availability (Stolz & Basu, 2002; Kechris *et al.*, 2006; Jones *et al.*, 2008). We tracked  
130 birth, speciation, duplication, loss, and HGT of genes in the nitrogen cycle over time by  
131 comparing the phylogenies for specific nitrogen-metabolizing genes to a time-calibrated tree of

132 life to demonstrate when these genes first arose and then spread across the tree of life on the  
133 early Earth.

134

## 135 **Materials and Methods**

### 136 *Genome Selection and Compilation*

137 The construction of both the gene and species trees for this study was based upon the  
138 manual curation of a genome database containing 308 genomes (including 254 bacterial and  
139 archaeal genomes) that served as the basis for the species tree and was subsequently searched to  
140 find genes related to nitrogen metabolism. Assembled genomes were downloaded from ggKBase  
141 (Hug *et al.*, 2016) and the NCBI assembly database (Kitts *et al.*, 2016). Additionally, 6 genomes  
142 were collected from a recent study identifying novel nitrogen fixers (Delmont *et al.*, 2018). In  
143 constructing the tree, we included at least one genome from each bacterial or archaeal phylum  
144 represented in the most recent comprehensive tree of life (Hug *et al.*, 2016) in order to create a  
145 tree fully representative of our current understanding of microbial diversity. It also includes a set  
146 of genomes associated with a database of *nifH* genes (Gaby & Buckley, 2014). Some eukaryotic  
147 genes were included for construction of the tree, but for this study we focused only on archaeal  
148 and bacterial genomes for identification of nitrogen cycling genes. Relative to archaea and  
149 bacteria, eukaryotes play a more minor role in the nitrogen cycle—while some species of fungi  
150 and protists reduce nitrate or nitrite to more reduced forms of nitrogen, there are no known  
151 eukaryotes that mediate nitrogen fixation, nitrification, DNRA, or anammox (Stein & Klotz,  
152 2016).

153

### 154 *Species tree and chronogram construction*

155 To create the species tree, all bacterial and archaeal genomes in our database were mined  
156 for single copy ribosomal protein sequences L2, L3, L4, L5, L6, L14, L15, L16, L18, L22, L24,  
157 S3, S8, S10, S17, and S19 using Phylosift (Darling *et al.*, 2014), with the isolate and best hit  
158 command line flags. These sixteen ribosomal proteins represent the same proteins used to create  
159 a recent comprehensive tree of life (Hug *et al.*, 2016) and, in the case of eukaryotes, ribosomal  
160 sequences were directly drawn from their dataset. All genomes included in the dataset contained  
161 fewer than 50% gaps in the alignment. These 16 single-copy ribosomal proteins were

162 concatenated to create a final alignment of 2897 characters for phylogenetic reconstruction and  
163 molecular clock evaluation.

164 Alignments for the species trees were made using the Phylosift pipeline (Darling *et al.*,  
165 2014) and curated to only include the target ribosomal proteins listed above. The phylogeny was  
166 constructed using RAxML v.8.2.9 with 100 rapid bootstraps (Stamatakis, 2014). The CAT  
167 model, which calculates site-specific evolutionary rates, was used with an LG substitution matrix  
168 to construct the species tree based on reference marker genes (the species tree). The root for the  
169 species tree was placed in the Bacterial domain (Fournier & Gogarten, 2010).

170

### 171 *Chronogram Construction*

172 The species tree was converted into chronograms using PhyloBayes (Lartillot *et al.*, 2009) using  
173 different clock models and calibration points in order to test the sensitivity of our results to  
174 variation in Phylobayes parameters. The root age was set via a normally distributed gamma root  
175 prior according to the liberal or conservative calibration points set in Table 1 and Supplementary  
176 Table 1, with standard deviation set to 200 in accordance with previous studies (Magnabosco *et*  
177 *al.*, 2018). We tested two separate sets of calibration points, one liberal (which represents the  
178 earliest date for which there is any evidence of a given event based on the current scientific  
179 literature) and one conservative (which represents the earliest date for which there is the most  
180 consensus for a given event based on the current scientific literature), to test the sensitivity of  
181 methodology (Table 1 and Supplementary Table 1). For each set of internal calibration points,  
182 the ages in the calibration files were set as the hard lower bound for the analysis. The liberal  
183 calibration points shown in Supplementary Table 1 yielded unrealistic root ages (>4.5 Ga) and  
184 therefore were not used for further analyses.

185 We created chronograms using both the uncorrelated gamma (UGAM) model  
186 (Drummond *et al.*, 2006) and the autocorrelated CIR relaxed clock model (Lepage *et al.*, 2007)  
187 to compare the effects of clock model type on the results. Two chains were run in parallel for  
188 each set of parameters, so that the two concurrent runs could be compared to one another as a  
189 test of convergence. Convergence of the MCMC chains was checked visually by plotting the  
190 summary statistics, and quantitatively by comparing the posterior distributions of two parallel  
191 chains using the *tracecomp* and *bpcomp* programs in PhyloBayes. We required an effective size  
192 >100 and a maximum difference between chains of <0.3. Simultaneous chains were run for



193 approximately 36,000 cycles. Chronograms were generated using the *readdiv* function in  
194 Phylobayes 4.1, with approximately 20% of initial cycles discarded as burn-in. Chronograms  
195 were visualized using the phytools package in R (Revell, 2012). In order to test for the influence  
196 of the priors, we generated additional chronograms in the absence of sequence data using the -  
197 prior flag in Phylobayes. These chronograms displayed substantially different node timings,  
198 demonstrating that the priors did not overly influence the inferred dates and the sequence data  
199 informed the chronogram. Results from molecular clock analyses should be interpreted with  
200 caution, given the limitations associated with these analyses, including but not limited to  
201 changing generation times, the influence of natural selection, and variation in mutational rates  
202 across species (Ayala, 1999; Schwartz & Maresca, 2006; Bromham *et al.*, 2018). Here, we  
203 attempted to ameliorate some of these challenges by using methods allowing for variation of  
204 rates between and across lineages, and by comparing results produced by different clock models.  
205 Finally, our goal with this analysis was not to pinpoint exact dates for many of the transitions  
206 discussed here, but rather to compare the relative timing on broad evolutionary scales.

207

#### 208 *Identification of nitrogen-cycling genes and construction of gene trees*

209 Curated gene database queries for each of the nitrogen-cycling genes we investigated  
210 were generated based on KEGG orthologies (Ogata *et al.*, 1999) and downloaded from the  
211 UniProt database (The Uniprot Consortium, 2017). Nitrogen-cycling amino acid sequences for  
212 the gene trees were identified by conducting BLASTP (Altschul *et al.*, 1990) searches of the  
213 open reading frames (ORFs) of every genome from the collection of 254 genomes. All ORFs  
214 were identified using Prodigal (Hyatt *et al.*, 2010). The maximum e-value cutoff for BLAST hits  
215 was  $10^{-12}$  and matches were excluded if the length of the local alignment was less than 50% of  
216 the length of the query sequence. BLAST results were compared with results from AnnoTree  
217 (Mendler *et al.*, 2019) to verify gene distributions. Given that *nifK* and *nifD* have a shared  
218 evolutionary history (Fani *et al.*, 2000), an e-value cutoff of  $1e-30$  was selected based on close  
219 examination of blastp hit results and KEGG annotations, which was sufficient to distinguish  
220 these subunits. For nitrogenase subunits *nifH*, *vnfD*, *vnfK*, *anfD*, and *anfK* we manually curated  
221 alignments by identifying key residues that were crucial for enzyme structure and function, as  
222 determined through literature searches and visualization using PyMol (Brigle *et al.*, 1987; Kaiser  
223 *et al.*, 2011; McGlynn *et al.*, 2012; Howard *et al.*, 2013; Keable *et al.*, 2018). Jalview



224 (Waterhouse *et al.*, 2009) was used for visualization of key residues in alignments. All genes that  
225 did not include the key residues were removed from the alignment. Finally, to ensure that only  
226 the genes of interest were included in alignments and to verify annotations, all genes identified in  
227 the BLAST search were compared to the KEGG database using Kofam Koala (Aramaki *et al.*,  
228 2019), which assigns KEGG Ortholog numbers to each gene by using a homology search against  
229 a database of profile hidden Markov models. Only genes verified to be the gene of interest  
230 according to Kofam Koala were retained for downstream analysis. It is important to note that  
231 gene identification is necessarily limited by the search tools and databases used for annotation,  
232 and the methods used here were chosen to be conservative so as to ensure the removal of non-  
233 target genes from the analysis.

234         Alignments for the gene trees were created using MUSCLE (Edgar, 2004) and trimmed  
235 with TrimAl (Capella-Gutierrez *et al.*, 2009) using the -automated1 option. The model of  
236 evolution was selected using Model Selection as implemented in IQTREE (Kalyaanamoorthy *et*  
237 *al.*, 2017) using the default parameters. Trees were generated with RAxML-NG (Kozlov *et al.*,  
238 2019) using the model of evolution identified in IQ-TREE. Trees were run with at least 1000  
239 bootstraps or until the diagnostic statistic based on the MRE-based bootstrapping test as  
240 implemented in RAxML-NG dropped below a cutoff of 0.03.

241

#### 242 *Gene Tree and Species Chronogram Reconciliation*

243         Gene trees were reconciled with species chronograms using the Analyzer of Gene and  
244 Species Trees (AnGST) (David & Alm, 2011). AnGST compares the topology of the gene tree  
245 with that of the species tree, rather than rely solely on presence and absence patterns, in order to  
246 identify gene birth, transfer, duplication, and loss events. Event penalties were set to hgt: 3, dup:  
247 2, los: 1, and spc: 0. Ultrametric was set to True in order to constrain events temporally. Each run  
248 was conducted with 100 gene tree bootstraps in order to increase accuracy (David & Alm, 2011).  
249 Individual event timings were defined as the midpoint of the temporal region during which a  
250 given event could occur.

251

## 252 **Results**

### 253 *Generation of a species tree and fossil-calibrated chronogram*

254 We compared all gene trees to a species tree constructed from an alignment of  
255 concatenated sequences of 16 single-copy universal proteins from 308 organisms (Figure 2;  
256 genome list available as Supplemental Data). Monophyly was preserved for most major phyla,  
257 with three exceptions: (i) Tenericutes is contained within Firmicutes, (ii) the PVC superphylum  
258 contains Omnitrophica, and (iii) Lentisphaerae is nested within Verrucomicrobia. Additionally,  
259 in contrast to a recently published comprehensive tree of life (Hug *et al.*, 2016), our tree does not  
260 place the recently-discovered Candidate Phyla Radiation (CPR) bacteria as the deepest-rooted  
261 bacterial clade; however, the CPR is placed as a sister group to the Cyanobacteria and  
262 Melainabacteria, which is consistent with that phylogeny (Hug *et al.*, 2016). For the purposes of  
263 this study, placement of these groups should not greatly affect our results due to the high number  
264 of duplication/loss/transfer events we inferred overall across all groups. The species tree used for  
265 this analysis is a three-domain tree, in contrast to recent studies which have shown the addition  
266 of the Asgard Archaea to the tree of life to cause Eukaryotes to group within Archaea (Zaremba-  
267 Niedzwiedzka *et al.*, 2017). However, we are agnostic as to the placement of the Asgard  
268 superphylum and the eukaryotes on the tree of life, as this was not our focus; the relationship of  
269 the three domains to one another should not substantially affect the results shown here due to the  
270 relative infrequency of inter-domain HGT relative to interdomain HGT, and the exclusion of  
271 eukaryotic nitrogen-cycling genes.

272 We constructed four different chronograms from our species tree using two different  
273 clock models (UGAM and CIR) as well as liberal (representing the earliest date for which there  
274 is any evidence of a given event based on the current scientific literature) and conservative  
275 (representing the earliest date for which there is the most consensus for a given event based on  
276 the current scientific literature) fossil calibration points (see Methods). The liberal calibration  
277 points yielded an unreasonable root age (>4.5 Ga) and so were not further used for analysis. The  
278 UGAM clock model yielded a greater spread in estimated ages for node divergences, with an  
279 earlier root age (approximately 4044.68 +/- 143.093 Mya compared to 3982 +/- 131.218 Mya for  
280 the CIR clock model). The results shown in Figure 3 and Table 4 derive from the CIR clock  
281 model as this has been previously shown to outperform uncorrelated models (Lepage *et al.*,  
282 2007), but the results from the UGAM clock model are shown in Supplementary Figure 3 and  
283 Supplementary Table 2. All genome lists, alignments, and Newick files have been deposited in  
284 FigShare at:

285 [https://figshare.com/projects/Radiation\\_of\\_nitrogen\\_cycling\\_genes\\_across\\_the\\_tree\\_of\\_life/874](https://figshare.com/projects/Radiation_of_nitrogen_cycling_genes_across_the_tree_of_life/874)  
286 [61](#)

287  
288 *Identification of duplication, speciation, loss, and horizontal gene transfer events for nitrogen-*  
289 *cycling genes*

290 We identified 18 different nitrogen-cycling genes for analysis of horizontal gene transfer,  
291 speciation, duplication, and loss events (Table 2). This methodology is best suited to genes that  
292 have many representatives from a diverse suite of taxa. Very few genes from the *hao* and *amo*  
293 gene families were identified in these genomes or passed our stringent filtration tests, and thus  
294 they did not yield sufficient data for robust conclusions and were not included in further  
295 analyses. We generated maximum likelihood gene trees for each of the remaining genes  
296 (Supplementary Data) and compared these gene trees to the fossil-calibrated chronogram in order  
297 to identify and infer the timing of birth, duplication, loss, and horizontal gene transfer events for  
298 each of these genes. The number of speciation events inferred for each gene in this study was  
299 relatively high compared to the number of inferred loss and HGT events (Table 3), with very few  
300 duplication events observed. Inferred loss events generally skewed younger than inferred  
301 horizontal gene transfer and speciation events. Our results indicate that the iron-molybdenum  
302 nitrogenases (*nifH/nifD/nifK*) were among the oldest genes, originating during the Archean era  
303 and beginning to spread across the tree of life via horizontal gene transfer fairly early in Earth  
304 history (Fig. 3). In contrast, the alternative nitrogenases *anf* and *vnf* were inferred to have arisen  
305 and radiated across the tree of life much later (Table 4, Supplementary Table 2, Supplementary  
306 Figures 4 and 5), but very few *anf* and *vnf* genes were identified among our sample set and  
307 therefore these results should be treated with caution (Table 2). The denitrifying genes *norB*,  
308 *nosZ*, *nirK* and *nirS* were inferred to have arisen later in Earth history (Table 4) and began to  
309 proliferate across the tree of life much more recently, up to approximately 1.5 Ga (Figure 3).  
310 These genes encode enzymes that catalyze denitrification processes from nitrite to nitric oxide,  
311 nitrous oxide, and dinitrogen gas. The genes *nrfA* and *nirB*, which are involved in the DNRA  
312 process, are inferred to have arisen by approximately 2.7-2.2 Ga, and began to increasingly  
313 proliferate widely across the tree of life into the Mesoproterozoic. Genes involved in nitrate  
314 reduction, including *narG*, *nasA*, and *napA*, were inferred to have arisen relatively early  
315 (approximately 2.8 Ga for *narG* and *napA*; approximately 2.3 Ga for *nasA*) (Table 4) and we

316 inferred a few speciation and horizontal gene transfer events for these genes between 2-2.5 Ga,  
317 but we did not observe a rise in HGT events for these genes until much later, at approximately  
318 1.5 Ga (Figure 3). We observed a similar trend for *nxrA*, a gene involved in nitrite oxidation,  
319 which was inferred to have arisen around 2.8 Ga but did not exhibit a rise in speciation,  
320 duplication, or transfer events until approximately 1.5 Ga (Figure 3, Table 4).

321 Taken together, we observed that genes related to the fixation of nitrogen from dinitrogen gas to  
322 ammonium arose early and proliferated across the tree of life relatively quickly, while genes  
323 related to nitrate reduction and nitrite oxidation also arose early but did not begin to proliferate  
324 across the tree of life until later. Genes related to denitrification, particularly downstream from  
325 nitrite, arose much later (Figure 3). Our results regarding the timing of the birth, duplication,  
326 speciation, loss and HGT events for specific nitrogen-cycling genes showed a few differences  
327 between the CIR (Figure 3, Table 4) and UGAM clock models (Supplementary Figure 3,  
328 Supplementary Table 2). However, the overall patterns in the relative timing for the birth and  
329 spread of specific genes in the nitrogen cycle were similar regardless of the type of clock models  
330 used.

331

## 332 **Discussion**

333 We have focused here on tracking gene birth, duplication, speciation, and particularly  
334 horizontal gene transfer events across deep time. The acquisition of new functional genes is  
335 particularly important because it can allow clades of microbes to invade new ecological niches.  
336 The rate of horizontal gene transfer itself is likely to be related to variables like cell density, co-  
337 localization of donor and recipient, cell diversity, and the types of organisms involved (Gogarten  
338 & Townsend, 2005). Although some have argued for a neutral theory of gene transfer in which  
339 horizontally acquired genes are not adaptive (Gogarten & Townsend, 2005; Andreani *et al.*,  
340 2017), studies indicating that horizontally transferred genes perform crucial cellular functions  
341 and enable adaptation to specific ecological niches suggest that horizontally acquired genes are  
342 generally adaptive (Daubin & Ochman, 2004; Coleman & Chisholm, 2010; Burke *et al.*, 2011;  
343 Popa *et al.*, 2011; Polz *et al.*, 2013; McInerney *et al.*, 2017; Moulana *et al.*, 2020). Moreover,  
344 genes providing selective advantages are more likely to be retained in the genome than genes  
345 acquired due to neutral transfer, which are more likely to be purged, thus strengthening the signal  
346 of adaptive HGT events in the genomic record. Therefore, any observations of a rise in the

347 relative number of successful horizontal gene transfers for a given gene are likely to give an  
348 indication of the relative availability or metabolic importance of a given substrate for that gene.  
349 As such, studying the history of HGT of specific genes can provide insights into the points at  
350 which possession of such genes provided substantial selective advantages, which can then be  
351 used as a metric for when a specific metabolism became feasible or energetically favorable, or  
352 when the substrates of specific enzymes became relatively abundant. A crucial caveat to this  
353 method, however, is that it cannot infer relative abundance or population sizes of the organisms  
354 carrying these genes. Thus, if a specific strain carrying a nitrogen metabolizing gene grows in  
355 abundance with no transfer of genes to other lineages, our method would observe low rates of  
356 transfer for genes involved in that metabolism. Additionally, a poor phylogeny caused by weak  
357 phylogenetic signal within the alignment would make it difficult to precisely identify such  
358 horizontal gene transfer events. Therefore, these results, while easily overinterpreted, should  
359 largely be interpreted in the context of other studies, especially those which use substantially  
360 different methodologies.

361 On the whole, our results provide support for geochemical data indicating that biological  
362 nitrogen fixation was an important source of fixed nitrogen in the Archaean (Stüeken *et al.*,  
363 2015; Ossa Ossa *et al.*, 2019). These results also suggest that local sources of nitrate may have  
364 been exploited by denitrifying microbes, while denitrifiers using nitrite or downstream products  
365 would not have proliferated until much later in Earth history, until the mid-Proterozoic, well after  
366 the Great Oxidation Event. This finding is consistent with previous geochemical studies that  
367 documented isotopic evidence of denitrification in the Neoproterozoic (Garvin *et al.*, 2009b;  
368 Godfrey & Falkowski, 2009; Koehler *et al.*, 2019) and Paleoproterozoic (Zerkle *et al.*, 2017a;  
369 Kipp *et al.*, 2018; Luo *et al.*, 2018). Our results suggest that genes involved in nitrate reduction  
370 arose by approximately 2.8 Ga, indicating that nitrate was present and used as a metabolic  
371 substrate at that time. However, our data suggest that denitrification may not have been a reliable  
372 energy source until about 1.5 Ga, and therefore used by a smaller diversity of clades. From the  
373 mid-Proterozoic onwards, nitrate may have been sufficiently bioavailable to make it a more  
374 widely-used substrate. In the following, we discuss the implications of our results for the  
375 evolution of the nitrogen cycle and its relationship to the redox state of the Earth.

376

377 *Nitrogen Fixation*

378 Our data indicate that nitrogen fixation through the use of molybdenum nitrogenase (Nif)  
379 is an ancient process, arising by approximately 3.1-2.7 Ga (Table 4). Our results are consistent  
380 with previous work from geochemical analyses suggesting that nitrogen fixation must have  
381 arisen early in order to support an expanding biosphere (Stüeken *et al.*, 2016a; Koehler *et al.*,  
382 2019; Ossa Ossa *et al.*, 2019). In contrast, a previous analysis based on the evolutionary rate of  
383 nitrogenase genes suggested that functional Mo-nitrogenase arose relatively late (approx. 2.2-1.5  
384 Ga) (Boyd *et al.*, 2011a), which may also be consistent with the hypothesis that modern  
385 planktonic nitrogen fixers did not become abundant in global oceans until the Neoproterozoic  
386 (Sánchez-Baracaldo *et al.*, 2014). Our results, which are based on reconciliation of gene trees  
387 with a chronogram inferred from universally conserved, single-copy genes, are instead consistent  
388 with recent nitrogen isotope evidence for biological nitrogen fixation back to at least 3.2 Ga  
389 (Stüeken *et al.*, 2015). It is also consistent with phylogenetics work suggesting that molybdenum  
390 nitrogenase arose early in the evolution of life on Earth (Raymond *et al.*, 2004). Similarly,  
391 phylogenetic reconstructions showing that Mo-nitrogenases arose before V- and Fe-nitrogenases  
392 are consistent with this conclusion (Garcia *et al.*, 2020). It has been argued that nitrogenase was  
393 present in LUCA (Weiss *et al.*, 2016), though that has been disputed (Boyd *et al.*, 2011a; Mus *et*  
394 *al.*, 2019; Berkemer & McGlynn, 2020) and our results do not resolve this issue. However, the  
395 identification of horizontal gene transfer events for nitrogenase subunits during the Archean  
396 (Figure 3) suggest that this metabolism may have been abundant and beneficial enough during  
397 this time period to have been successfully transferred and retained in microbial genomes.

398 Our results support the argument that abiotic sources of fixed nitrogen were unlikely to  
399 be significant enough to sustain the early biosphere (Raymond *et al.*, 2004; Canfield *et al.*,  
400 2010). It has been proposed that early life received its nitrogen from the lightning-catalyzed  
401 reaction between N<sub>2</sub> and CO<sub>2</sub> as a source of NO<sub>x</sub>, and that a steady reduction in atmospheric CO<sub>2</sub>  
402 levels reduced this flux, eventually leading to a nitrogen crisis around 2.2 Ga that would have  
403 favored the rise and spread of biological nitrogen fixation (Navarro-González *et al.*, 2001). In  
404 contrast, several studies have concluded that abiotic nitrogen fixation on the early Earth would  
405 produce 50- to 5000-fold lower rates of fixed nitrogen than what is contained in the modern  
406 ocean, making nitrogen highly limiting to the early biosphere, even at higher CO<sub>2</sub> levels  
407 (Canfield *et al.*, 2010). Our data suggest that biological nitrogen fixation arose and proliferated  
408 early and that acquisition of the nitrogenase enzyme provided enough of a selective advantage to



409 be successfully transferred across lineages during the early Archean, supporting the notion that  
410 fixed nitrogen was not widely available.

411         Moreover, if the radiation of biological N<sub>2</sub> uptake dates back to the early Archean, it may  
412 have had a significant impact on atmospheric pressure. Today, nitrogen makes up approximately  
413 78% of the Earth's modern atmosphere by volume, predominantly as N<sub>2</sub> gas. The atmosphere of  
414 the early Earth was probably also N<sub>2</sub>-rich, but while some models suggest a 2-4 times larger  
415 atmospheric N<sub>2</sub> reservoir in the Archean (Johnson & Goldblatt, 2018), proxy evidence ranges  
416 from near modern values (Marty *et al.*, 2013; Avice *et al.*, 2018) to less than half of today's  
417 reservoir (Som *et al.*, 2016). If atmospheric N<sub>2</sub> pressure changed over time, it is likely that  
418 biological activity would have played a major role in driving these changes by enhancing  
419 nitrogen burial in sediments and by accelerating oxidative weathering of nitrogen from  
420 continental crust (Stüeken *et al.*, 2016b; Zerkle & Mikhail, 2017). If nitrogen was fixed by  
421 nitrogenase early in the Archean, as indicated by our results, then biological nitrogen burial  
422 began long before the onset of oxidative weathering in the Neoproterozoic (Stüeken *et al.*, 2012)  
423 which makes it possible that atmospheric N<sub>2</sub> decreased over the course of the Archean. Although  
424 further paleobarometric proxies are needed to verify this trend, our results provide an important  
425 anchor point for the onset of biological N<sub>2</sub> drawdown.

426         Lastly, though we identified very few iron and vanadium nitrogenases (*anf* and *vnf*,  
427 respectively) in our datasets, our results tentatively suggest that these nitrogenases radiated  
428 across the tree of life later than the iron-molybdenum nitrogenases (*nif*), which supports  
429 conclusions from other phylogenetics studies (Garcia *et al.*, 2020). The early rise of Mo-  
430 dependent nitrogenase would have required a source of Mo to act as a cofactor for Mo-  
431 containing nitrogenases, implying that nanomolar levels of dissolved Mo (Scott *et al.*, 2008;  
432 Reinhard *et al.*, 2013), presumably derived from anoxic weathering or hydrothermal sources of  
433 molybdenum to the early ocean, were sufficient for the development of Nif and the proliferation  
434 of nitrogen fixers. Oxidative weathering was therefore evidently not required for the onset of  
435 biological nitrogen fixation (c.f. Boyd *et al.*, 2011b). We speculate that the evolutionary pressure  
436 for the diversification of alternative nitrogenases arose in the Neoproterozoic with the rise of  
437 eukaryotic algae (Brocks *et al.*, 2017), which may have substantially increased the nitrogen  
438 demand in the global ocean. Vanadium and iron-based nitrogenases are less efficient at fixing  
439 nitrogen than Nif (Mus *et al.*, 2018), which perhaps lowers the probability of successful gene



440 transfer for Vnf and Anf. However, when nitrogen-demand increased in the environment, it is  
441 conceivable that more of these genes were shared successfully. Another hypothesis to explain  
442 our data is that the gene transfer of alternative nitrogenases was affected by global climate. Vnf  
443 becomes more efficient than Nif at cold temperatures (Miller & Eady, 1988) and the activity of  
444 Nif-using cyanobacteria decreases at high latitudes (Brauer *et al.*, 2013). Thus, the cold climate  
445 of the Cryogenian 'Snowball Earth' period (720-635 Ma) (Hoffman *et al.*, 2017) may have  
446 increased the fitness of organisms possessing Vnf. However, these hypotheses remain  
447 speculative until more genomic data for Vnf and Anf has been acquired. In any case, it is  
448 important to keep in mind that the origin of alternative nitrogenases likely occurred long before  
449 the Neoproterozoic. Vanadium nitrogenase in *Azotobacter vinelandii* has been shown to reduce  
450 carbon monoxide (CO) to the hydrocarbons ethylene (C<sub>2</sub>H<sub>2</sub>), ethane (C<sub>2</sub>H<sub>6</sub>), and propane (C<sub>3</sub>H<sub>8</sub>)  
451 (Lee *et al.*, 2010), which supports the origin of V-nitrogenase in the Archean eon when CO was  
452 more abundant in the atmosphere (Anbar & Knoll, 2002). Additionally, V was bioavailable in  
453 Archean ocean waters under slightly acidic conditions (Moore *et al.*, 2020). The genomes of  
454 more V-nitrogenase and Fe-nitrogenase organisms must be sequenced to better understand the  
455 evolutionary history of these alternative nitrogenases.

456

#### 457 *Nitrogen Cycling Prior to the Oxygenation of the Oceans and Atmosphere*

458 Although our results suggest that nitrogen fixation was an important process on the early  
459 Earth, microbial metabolisms making use of more oxidized forms of nitrogen, particularly  
460 through the process of denitrification downstream from nitrite, do not appear to have arisen and  
461 spread across the tree of life until much later. Some early steps in the nitrogen cycle, such as  
462 nitrate reduction to nitrite via *nasA*, *narG* or *napA*, appear to have arisen relatively early (in the  
463 late Archean or early Proterozoic), consistent with geochemical record of denitrification at that  
464 time (Godfrey & Falkowski, 2009; Koehler *et al.*, 2019). However, we did not identify many  
465 horizontal gene transfer events early in the evolutionary history of these genes, and their  
466 proliferation across the tree of life only began in earnest much later, approximately 1.5 Ga. Our  
467 results therefore suggest that nitrate availability was restricted in space and/or time. Indeed,  
468 thermodynamic constraints and environmentally resolved geochemical datasets show that the  
469 anoxic deep ocean of the Precambrian contained ammonium while nitrate was restricted to  
470 surface waters (Stüeken *et al.*, 2016a; Yang *et al.*, 2019). It is therefore likely that the nitrate-

471 reducing genes appeared in locally oxygenated regions of the Archean surface ocean, which have  
472 been inferred from isotopic studies back to 3.0 Ga (Olson *et al.*, 2013; Planavsky *et al.*, 2014). In  
473 such oxygen oases, oxygen concentrations may have reached micromolar concentrations (Olson  
474 *et al.*, 2013), which is high enough for the complete oxidation of ammonium to nitrite and nitrate  
475 (Lipschultz *et al.*, 1990). Alternatively, it a small flux of nitrogen oxides from lightning and  
476 volcanism may have existed (Navarro-González *et al.*, 2001; Mather *et al.*, 2004) and maintained  
477 populations of nitrate-reducing denitrifiers. Denitrification is a highly energy-yielding  
478 metabolism (Schoepp-Cothenet *et al.*, 2013), and therefore even a small source flux of nitrate to  
479 the early ocean would probably have been exploited. However, we stress that denitrification left  
480 its geochemical mark in only a few Archean basins (Garvin *et al.*, 2009b; Godfrey & Falkowski,  
481 2009; Koehler *et al.*, 2019), while other localities show no geochemical evidence of nitrate  
482 reduction (Ossa Ossa *et al.*, 2019) . This observation may argue against a significant contribution  
483 of lightning-derived nitrogen oxides, which we would expect to have been more uniformly  
484 distributed.

485 Our results suggest that genes for nitrite-metabolizing enzymes were not frequently  
486 transferred during the early Archean, which may imply that nitrite-metabolizing genes were not  
487 widespread in Archean ecosystems. It is possible that only specific taxa were responsible for the  
488 conversion of nitrite into nitrate or ammonium. Alternatively, the conversion of nitrite to  
489 ammonium may have happened abiotically. Ferrous iron ( $\text{Fe}^{2+}$ ), which is thought to have been  
490 abundant in the early anoxic ocean, may have readily reduced nitrite to ammonium or nitrogen  
491 gas without biological intervention (Summers & Chang, 1993; Canfield *et al.*, 2010). Nitrite  
492 levels during this time period were therefore likely too low to cause substantial proliferation of  
493 genes for enzymes which take nitrite as a substrate, while nitrate and ammonium concentration  
494 were high enough for selection to favor biological metabolism of these molecules by diverse  
495 microorganisms.

496

#### 497 *Effects of Increased Oxygen Levels on the Nitrogen Cycle*

498 Multiple lines of evidence point to increasing oxygenation of surface environments from  
499 2.75 Ga onwards, culminating in the Great Oxidation Event (GOE) at 2.3 Ga (Noffke *et al.*,  
500 2007; Crowe *et al.*, 2013; Lyons *et al.*, 2014; Planavsky *et al.*, 2014). Our data suggest that the  
501 genes *nrfA* and *nirB*, which reduce a variety of oxidized forms of nitrogen to ammonium through

502 the DNRA pathway, arose in the Neoproterozoic or Paleoproterozoic, but the relative number of  
503 HGT events for this gene began to rise approximately around the time of the GOE. Unlike  
504 denitrification to N<sub>2</sub> gas, DNRA retains the reduced nitrogen product in the system as aqueous  
505 NH<sub>4</sub><sup>+</sup>, which may have prevented a potential ‘nitrogen crisis’ during the wake of the GOE  
506 (Falkowski & Godfrey, 2008). The isotopic fingerprint of DNRA can so far not be distinguished  
507 from denitrification in the geochemical record, and thus our results provide the first indication  
508 that this metabolism may have been of greater ecological importance than previously proposed.  
509 DNRA rather than denitrification may therefore explain geochemical evidence of biological  
510 nitrate reduction in the Neoproterozoic and early Proterozoic (Garvin *et al.*, 2009b; Godfrey &  
511 Falkowski, 2009; Zerkle *et al.*, 2017b; Kipp *et al.*, 2018), i.e. long before our observed radiation  
512 in denitrification genes. This observation may suggest that these early nitrate-reducing  
513 ecosystems were primarily performing DNRA, consistent with iron-rich conditions in the  
514 Archean and Paleoproterozoic ocean (Michiels *et al.*, 2017).

515         After approximately 1.5 Ga, the relative number of HGT events for enzymes involved in  
516 the modern denitrification pathway began to rise. Additionally, our data suggest that the gene  
517 *nxr*, which oxidizes nitrite into nitrate, arose relatively early (approx. 2.8 Ga) but did not begin to  
518 spread across the tree of life until ~1.5 Ga. One possibility is that increased copper availability  
519 facilitated the spread of nitrification/denitrification, which require enzymes that rely on copper  
520 cofactors (Moore *et al.*, 2017). However, geochemical evidence of increasing copper  
521 concentrations in seawater at 1.5 Ga is so far lacking. Another possibility is that the expansion of  
522 these metabolisms is linked to a Mesoproterozoic rise in oxygen, which has recently been  
523 proposed in several geochemical studies (Cox *et al.*, 2016; Canfield *et al.*, 2018; Zhang *et al.*,  
524 2018; Shang *et al.*, 2019) Higher oxygen levels would have led to an expansion of the marine  
525 nitrate reservoir, which may in turn have been critical for the rise of eukaryotes around this time  
526 (Anbar & Knoll, 2002; Knoll & Nowak, 2017).

527         The primary substrate for many of the enzymes that demonstrated this late rise in the  
528 number of HGT events is nitrite, suggesting that nitrite levels may have increased at this time,  
529 such that selection favored the spread of nitrite-metabolizing enzymes across the tree of life.  
530 Nitrite is thermodynamically unstable in oxic conditions, but it occurs transiently in chemoclines  
531 in the modern ocean because it is abundantly produced as an intermediate in nitrification and  
532 denitrification pathways (Wada & Hatton, 1971). A more vigorous aerobic nitrogen cycle in the

533 Proterozoic may thus be linked to the establishment of a more permanent dynamic nitrite  
534 reservoir. Abiotic reduction of nitrite by  $\text{Fe}^{2+}$ , which was perhaps dominant during the Archean  
535 (see above), may have slowed down with the deepening of the chemocline after the GOE.

536 Several caveats must be kept in mind while interpreting these results. As mentioned  
537 above, the accuracy of molecular clocks is constrained by the models used to infer dates and the  
538 accuracy of the fossil-based time points used for clock calibration. We sought to minimize the  
539 influence of these parameters by using both liberal and conservative time points and by  
540 employing two different clock models, but nevertheless these limitations must be taken into  
541 consideration, and thus we emphasize the relative rather than the absolute timing of the events  
542 identified here. Importantly, the results generated through the use of liberal calibration points are  
543 not intended to be taken as an older bound for these gene proliferations, but rather as a test of the  
544 sensitivity of our results to the specifications of the molecular clock. Moreover, the methods used  
545 to identify genes used in the analysis were designed to be conservative so as to reduce the  
546 possibility that spurious genes were included in the analysis, but these methods are inherently  
547 limited by the quality of the databases used for annotation. These conservative methods  
548 precluded the inclusion of *hao* and *amo*, which are involved in the oxidation of ammonia to  
549 nitrite and nitrogen gas, in our analysis. Others have observed that archaeal ammonia oxidizers  
550 most likely originated during the GOE and began to spread through the shallow ocean  
551 approximately 800 Mya (Ren *et al.*, 2019). As new genes and genomes continue to be sequenced  
552 and analyzed for gene function, the quality of such analyses will improve over time.

553

## 554 **Conclusion**

555 Our results show that biological nitrogen fixation appears to have arisen and proliferated  
556 early in the Archean, and that genes in the denitrification pathway and genes related to the  
557 consumption of nitrite and its downstream products began to proliferate across the tree of life  
558 following the oxygenation of Earth's atmosphere and oceans. Moreover, our results support the  
559 hypothesis that the molybdenum-based variety of nitrogenase diversified much earlier than  
560 alternative nitrogenases, which may only have become important with the increasing nitrogen  
561 demand of algae in the Neoproterozoic, implying that molybdenum was not a limiting resource  
562 in the Archean ocean. Furthermore, our data provide the first indirect evidence for a small source  
563 of nitrate to the early ocean, possibly as a result of lightning and volcanism or from localized

564 oxygen oases. Some of this nitrate appears to have been used for nitrate reduction to ammonium  
565 (DNRA), which may have helped overcome nitrogen limitation by retaining fixed nitrogen in the  
566 system. DNRA rather than denitrification may explain some of the isotopic records of biological  
567 nitrate utilization in the Archean and early Proterozoic. We cannot confirm the hypothesized  
568 suppression of N<sub>2</sub>O-metabolizing enzymes in the mid-Proterozoic, but our results are consistent  
569 with vigorous nitrification and denitrification after the GOE, in particular from 1.5 Ga onwards,  
570 which may have led to leakage of N<sub>2</sub>O into the atmosphere and the stabilization of global  
571 climate. The proliferation of key nitrogen-metabolizing genes across the tree of life at different  
572 points in Earth's redox history provides important insights into the evolution and radiation of  
573 microbial metabolisms on the early Earth in response to major environmental transitions and  
574 supports the notion that increasing nitrate levels in the mid-Proterozoic may have contributed to  
575 the rise of eukaryotic life.

576 **Acknowledgements**

577 We thank three anonymous reviewers for extremely detailed and helpful comments that greatly  
578 improved the manuscript. We would like to thank Rou-Jia Sung for assistance with structural  
579 predictions, as well as Casey Bryce, Colin Goldblatt, Ben Johnson, John Baross, Victoria  
580 Meadows, Jaclyn Saunders, and Cara Magnabosco for support and useful discussions. This work  
581 was performed as part of NASA's Virtual Planetary Laboratory, supported by the NASA  
582 Astrobiology Program under grant 80NSSC18K0829 as part of the Nexus for Exoplanet System  
583 Science (NExSS) research coordination network. CWP received a Towsley Fellowship from  
584 Carleton College, CR was supported by the Virtual Planetary Laboratory, KM was supported by  
585 a Student Research Partnership grant from Carleton College, and REA was supported in part by a  
586 NASA Postdoctoral Fellowship from the NASA Astrobiology Institute.  
587

588 **References**

- 589 Altschul SF, Gish W, Miller W, Myers EW, Lipman DJ (1990) Basic local alignment search  
590 tool. *Journal of Molecular Biology* **215**, 403–410.
- 591 Anbar AD, Knoll AH (2002) Proterozoic ocean chemistry and evolution: A bioinorganic bridge?  
592 *Science* **297**, 1137–1142.
- 593 Andreani NA, Hesse E, Vos M (2017) Prokaryote genome fluidity is dependent on effective  
594 population size. *The ISME Journal* **11**, 1719–1721.
- 595 Aramaki T, Blanc-Mathieu R, Endo H, Ohkubo K, Kanehisa M, Goto S, Ogata H (2019)  
596 KofamKOALA: KEGG ortholog assignment based on profile HMM and adaptive score  
597 threshold. *Bioinformatics*.
- 598 Avice G, Marty B, Burgess R, Hofmann A, Philippot P, Zahnle K, Zakharov D (2018) Evolution  
599 of atmospheric xenon and other noble gases inferred from Archean to Paleoproterozoic rocks.  
600 *Geochimica et Cosmochimica Acta* **232**, 82–100.
- 601 Ayala FJ (1999) Molecular clock mirages. *BioEssays* **21**, 71–75.
- 602 Beiko RG, Harlow TJ, Ragan MA (2005) Highways of gene sharing in prokaryotes. *Proceedings*  
603 *of the National Academy of Sciences of the United States of America* **102**, 14332–7.
- 604 Bekker A, Holland HD, Wang P-L, Rumble D, Stein HJ, Hannah JL, Coetzee LL, Beukes NJ  
605 (2004) Dating the rise of atmospheric oxygen. *Nature* **427**, 117–120.
- 606 Berkemer SJ, McGlynn SE (2020) A New Analysis of Archaea–Bacteria Domain Separation:  
607 Variable Phylogenetic Distance and the Tempo of Early Evolution. *Molecular Biology and*  
608 *Evolution*.
- 609 Boyd ES, Anbar AD, Miller S, Hamilton TL, Lavin M, Peters JW (2011a) A late methanogen



- 610 origin for molybdenum-dependent nitrogenase. *Geobiology* **9**, 221–32.
- 611 Boyd ES, Hamilton TL, Peters JW (2011b) An alternative path for the evolution of biological  
612 nitrogen fixation. *Frontiers in Microbiology* **2**, 1–11.
- 613 Boyd ES, Peters JW (2013) New insights into the evolutionary history of biological nitrogen  
614 fixation. *Frontiers in microbiology* **4**, 201.
- 615 Brandes JA, Boctor NZ, Cody GD, Cooper BA, Hazen RM, Yoder HS (1998) Abiotic nitrogen  
616 reduction on the early Earth. *Nature* **395**, 365–367.
- 617 Brauer VS, Stomp M, Rosso C, Beusekom SA van, Emmerich B, Stal LJ, Huisman J (2013) Low  
618 temperature delays timing and enhances the cost of nitrogen fixation in the unicellular  
619 cyanobacterium *Cyanothece*. *The ISME Journal* **7**, 2105–2115.
- 620 Brigle KE, Weiss MC, Newton WE, Dean DR (1987) Products of the iron-molybdenum  
621 cofactor-specific biosynthetic genes, *nifE* and *nifN*, are structurally homologous to the products  
622 of the nitrogenase molybdenum-iron protein genes, *nifD* and *nifK*. *Journal of bacteriology* **169**,  
623 1547–53.
- 624 Brocks JJ, Jarrett AJM, Sirantoine E, Hallmann C, Hoshino Y, Liyanage T (2017) The rise of  
625 algae in Cryogenian oceans and the emergence of animals. *Nature* **548**, 578–581.
- 626 Bromham L, Duchêne S, Hua X, Ritchie AM, Duchêne DA, Ho SYW (2018) Bayesian  
627 molecular dating: Opening up the black box. *Biological Reviews*.
- 628 Buick R (2007) Did the Proterozoic “Canfield Ocean” cause a laughing gas greenhouse?  
629 *Geobiology* **5**, 97–100.
- 630 Burke C, Steinberg P, Rusch D, Kjelleberg S, Thomas T (2011) Bacterial community assembly  
631 based on functional genes rather than species. *Proceedings of the National Academy of Sciences*  
632 *of the United States of America* **108**, 14288–14293.
- 633 Canfield D, Kristensen E, Thamdrup B (2005) *Aquatic Geomicrobiology, Volume 48*.
- 634 Canfield DE, Glazer AN, Falkowski PG (2010) The evolution and future of Earth’s nitrogen  
635 cycle. *Science* **330**, 192–6.
- 636 Canfield DE, Zhang S, Frank AB, Wang X, Wang H, Su J, Ye Y, Frei R (2018) Highly  
637 fractionated chromium isotopes in Mesoproterozoic-aged shales and atmospheric oxygen. *Nature*  
638 *Communications* **9**, 2871.
- 639 Capella-Gutierrez S, Silla-Martinez JM, Gabaldon T (2009) trimAl: a tool for automated  
640 alignment trimming in large-scale phylogenetic analyses. *Bioinformatics* **25**, 1972–1973.



- 641 Coleman ML, Chisholm SW (2010) Ecosystem-specific selection pressures revealed through  
642 comparative population genomics. *Proceedings of the National Academy of Sciences of the*  
643 *United States of America* **107**, 18634–9.
- 644 Cox GM, Jarrett A, Edwards D, Crockford PW, Halverson GP, Collins AS, Poirier A, Li Z-X  
645 (2016) Basin redox and primary productivity within the Mesoproterozoic Roper Seaway.  
646 *Chemical Geology* **440**, 101–114.
- 647 Crowe SA, Døssing LN, Beukes NJ, Bau M, Kruger SJ, Frei R, Canfield DE (2013)  
648 Atmospheric oxygenation three billion years ago. *Nature* **501**, 535–538.
- 649 Czaja AD, Johnson CM, Beard BL, Roden EE, Li W, Moorbath S (2013) Biological Fe oxidation  
650 controlled deposition of banded iron formation in the ca. 3770 Ma Isua Supracrustal Belt (West  
651 Greenland). *Earth and Planetary Science Letters* **363**, 192–203.
- 652 Darling AE, Jospin G, Lowe E, Matsen FA, Bik HM, Eisen JA (2014) PhyloSift: phylogenetic  
653 analysis of genomes and metagenomes. *PeerJ* **2**, e243.
- 654 Daubin V, Ochman H (2004) Bacterial Genomes as New Gene Homes: The Genealogy of  
655 ORFans in *E. coli*. *Genome Research* **14**, 1036–1042.
- 656 David LA, Alm EJ (2011) Rapid evolutionary innovation during an Archaean genetic expansion.  
657 *Nature* **469**, 93–6.
- 658 Delmont TO, Quince C, Shaiber A, Esen ÖC, Lee ST, Rappé MS, MacLellan SL, Lückner S, Eren  
659 AM (2018) Nitrogen-fixing populations of Planctomycetes and Proteobacteria are abundant in  
660 surface ocean metagenomes. *Nature Microbiology* **3**, 804–813.
- 661 Drummond AJ, Ho SYW, Phillips MJ, Rambaut A (2006) Relaxed Phylogenetics and Dating  
662 with Confidence. *PLoS Biology* **4**, e88.
- 663 Edgar RC (2004) MUSCLE: multiple sequence alignment with high accuracy and high  
664 throughput. *Nucleic Acids Research* **32**, 1792–1797.
- 665 Eigenbrode JL, Freeman KH (2006) Late Archean rise of aerobic microbial ecosystems.  
666 *Proceedings of the National Academy of Sciences of the United States of America* **103**, 15759–  
667 15764.
- 668 Falkowski PG, Godfrey L V (2008) Electrons, life and the evolution of Earth's oxygen cycle.  
669 *Philosophical Transactions of the Royal Society B: Biological Sciences* **363**, 2705–2716.
- 670 Fani R, Gallo R, Liò P (2000) Molecular Evolution of Nitrogen Fixation: The Evolutionary  
671 History of the *nifD*, *nifK*, *nifE*, and *nifN* Genes. *Journal of Molecular Evolution* **51**, 1–11.

- 672 Fournier GP, Gogarten JP (2010) Rooting the ribosomal tree of life. *Molecular biology and*  
673 *evolution* **27**, 1792–801.
- 674 Gaby JC, Buckley DH (2014) A comprehensive aligned nifH gene database: a multipurpose tool  
675 for studies of nitrogen-fixing bacteria. *Database* □: *the journal of biological databases and*  
676 *curation* **2014**, bau001.
- 677 Gallon JR (1981) The oxygen sensitivity of nitrogenase: a problem for biochemists and micro-  
678 organisms. *Trends in Biochemical Sciences* **6**, 19–23.
- 679 Garcia AK, McShea H, Kolaczowski B, Kaçar B (2020) Reconstructing the evolutionary  
680 history of nitrogenases: Evidence for ancestral molybdenum □ cofactor utilization. *Geobiology*  
681 gbi.12381.
- 682 Garvin J, Buick R, Anbar AD, Arnold GL, Kaufman AJ (2009a) Isotopic Evidence for an  
683 Aerobic Nitrogen Cycle in the Latest Archean. *Science* **323**, 1045–1048.
- 684 Garvin J, Buick R, Anbar AD, Arnold GL, Kaufman AJ (2009b) Isotopic evidence for an aerobic  
685 nitrogen cycle in the latest Archean. *Science* **323**, 1045–8.
- 686 Giblin A., Tobias CR, Song B, Weston N, Banta GT, Rivera-Monroy VH (2013) The importance  
687 of dissimilatory nitrate reduction to ammonium (DNRA) in the nitrogen cycle of coastal  
688 ecosystems. *Oceanography* **26**, 124–131.
- 689 Gibson TM, Shih PM, Cumming VM, Fischer WW, Crockford PW, Hodskiss MSW, Worndle S,  
690 Creaser RA, Rainbird RH, Skulski TM, Halverson GP (2018) Precise age of Bangiomorpha  
691 pubescens dates the origin of eukaryotic photosynthesis. *Geology* **46**, 135–138.
- 692 Godfrey L V., Falkowski PG (2009) The cycling and redox state of nitrogen in the Archaean  
693 ocean. *Nature Geoscience* **2**, 725–729.
- 694 Gogarten JP, Townsend JP (2005) Horizontal gene transfer, genome innovation and evolution.  
695 *Nature reviews. Microbiology* **3**, 679–87.
- 696 Hoffman PF, Abbot DS, Ashkenazy Y, Benn DI, Brocks JJ, Cohen PA, Cox GM, Creveling JR,  
697 Donnadiou Y, Erwin DH, Fairchild IJ, Ferreira D, Goodman JC, Halverson GP, Jansen MF, Hir  
698 G Le, Love GD, Macdonald FA, Maloof AC, Partin CA, Ramstein G, Rose BEJ, Rose C V.,  
699 Sadler PM, Tziperman E, Voigt A, Warren SG (2017) Snowball Earth climate dynamics and  
700 Cryogenian geology-geobiology. *Science Advances* **3**, e1600983.
- 701 Howard JB, Kechris KJ, Rees DC, Glazer AN (2013) Multiple amino acid sequence alignment  
702 nitrogenase component 1: insights into phylogenetics and structure-function relationships. *PloS*

- 703 *one* **8**, e72751.
- 704 Hug LA, Baker BJ, Anantharaman K, Brown CT, Probst AJ, Castelle CJ, Butterfield CN,  
705 Hermsdorf AW, Amano Y, Ise K, Suzuki Y, Dudek N, Relman DA, Finstad KM, Amundson R,  
706 Thomas BC, Banfield JF (2016) A new view of the tree of life. *Nature Microbiology* **1**, 16048.
- 707 Hyatt D, Chen G-L, LoCascio PF, Land ML, Larimer FW, Hauser LJ (2010) Prodigal:  
708 prokaryotic gene recognition and translation initiation site identification. *BMC Bioinformatics*  
709 **11**, 119.
- 710 Isson TT, Love GD, Dupont CL, Reinhard CT, Zumberge AJ, Asael D, Gueguen B, McCrow J,  
711 Gill BC, Owens J, Rainbird RH, Rooney AD, Zhao M-Y, Stueeken EE, Konhauser KO, John  
712 SG, Lyons TW, Planavsky NJ (2018) Tracking the rise of eukaryotes to ecological dominance  
713 with zinc isotopes. *Geobiology* **16**, 341–352.
- 714 Joerger RD, Bishop PE, Evans HJ (1988) Bacterial Alternative Nitrogen Fixation Systems. *CRC*  
715 *Critical Reviews in Microbiology* **16**, 1–14.
- 716 Johnson BW, Goldblatt C (2018) EarthN: A new earth system nitrogen model. *Geochemistry,*  
717 *Geophysics, Geosystems.*
- 718 Jones CM, Stres BB, Rosenquist M, Hallin S (2008) Phylogenetic analysis of nitrite, nitric oxide,  
719 and nitrous oxide respiratory enzymes reveal a complex evolutionary history for denitrification.  
720 *Molecular Biology and Evolution* **25**, 1955–1966.
- 721 Kaiser JT, Hu Y, Wiig JA, Rees DC, Ribbe MW (2011) Structure of precursor bound NifEN: a  
722 nitrogenase FeMo cofactor maturase/insertase. *Science (New York, N.Y.)* **331**, 91.
- 723 Kalyaanamoorthy S, Minh BQ, Wong TKF, Haeseler A von, Jermiin LS (2017) ModelFinder:  
724 fast model selection for accurate phylogenetic estimates. *Nature Methods* **14**, 587–589.
- 725 Keable SM, Vertemara J, Zadovnyy OA, Eilers BJ, Danyal K, Rasmussen AJ, Gioia L De,  
726 Zampella G, Seefeldt LC, Peters JW (2018) Structural characterization of the nitrogenase  
727 molybdenum-iron protein with the substrate acetylene trapped near the active site. *Journal of*  
728 *Inorganic Biochemistry* **180**, 129–134.
- 729 Kechris KJ, Lin JC, Bickel PJ, Glazer AN (2006) Quantitative exploration of the occurrence of  
730 lateral gene transfer by using nitrogen fixation genes as a case study. *Proceedings of the National*  
731 *Academy of Sciences of the United States of America* **103**, 9584–9.
- 732 Kipp MAMA, Stueeken EEEE, Yun M, Bekker A, Buick R (2018) Pervasive aerobic nitrogen  
733 cycling in the surface ocean across the Paleoproterozoic Era. *Earth and Planetary Science*

- 734 *Letters* **500**, 117–126.
- 735 Kitts PA, Church DM, Thibaud-Nissen F, Choi J, Hem V, Sapojnikov V, Smith RG, Tatusova T,  
736 Xiang C, Zherikov A, DiCuccio M, Murphy TD, Pruitt KD, Kimchi A (2016) Assembly: a  
737 resource for assembled genomes at NCBI. *Nucleic acids research* **44**, D73–80.
- 738 Knoll AH, Nowak MA (2017) The timetable of evolution. *Science Advances* **3**, e1603076.
- 739 Koehler MC, Buick R, Barley ME (2019) Nitrogen isotope evidence for anoxic deep marine  
740 environments from the Mesoarchean Mosquito Creek Formation, Australia. *Precambrian*  
741 *Research* **320**, 281–290.
- 742 Koehler MC, Buick R, Kipp MA, Stüeken EE, Zaloumis J (2018) Transient surface ocean  
743 oxygenation recorded in the ~2.66-Ga Jeerinah Formation, Australia. *Proceedings of the*  
744 *National Academy of Sciences of the United States of America* **115**, 7711–7716.
- 745 Koonin E V., Makarova KS, Aravind L (2001) Horizontal gene transfer in prokaryotes:  
746 Quantification and classification. *Annual Review of Microbiology* **55**, 709–742.
- 747 Kozlov AM, Darriba D, Flouri T, Morel B, Stamatakis A (2019) RAxML-NG: a fast, scalable  
748 and user-friendly tool for maximum likelihood phylogenetic inference. *Bioinformatics* **35**, 4453–  
749 4455.
- 750 Kuypers MMM, Marchant HK, Kartal B (2018) The microbial nitrogen-cycling network. *Nature*  
751 *reviews. Microbiology* **16**, 263–276.
- 752 Lartillot N, Lepage T, Blanquart S (2009) PhyloBayes 3: A Bayesian software package for  
753 phylogenetic reconstruction and molecular dating. *Bioinformatics* **25**, 2286–2288.
- 754 Lee CC, Hu Y, Ribbe MW (2010) Vanadium nitrogenase reduces CO. *Science (New York, N.Y.)*  
755 **329**, 642.
- 756 Lepage T, Bryant D, Philippe H, Lartillot N (2007) A general comparison of relaxed molecular  
757 clock models. *Molecular biology and evolution* **24**, 2669–80.
- 758 Lipschultz F, Wofsy SC, Ward BB, Codispoti LA, Friedrich G, Elkins JW (1990) Bacterial  
759 transformations of inorganic nitrogen in the oxygen-deficient waters of the Eastern Tropical  
760 South Pacific Ocean. *Deep Sea Research Part A. Oceanographic Research Papers* **37**, 1513–  
761 1541.
- 762 Löscher CR, Kock A, Könneke M, LaRoche J, Bange HW, Schmitz RA (2012) Production of  
763 oceanic nitrous oxide by ammonia-oxidizing archaea. *Biogeosciences* **9**, 2419–2429.
- 764 Luo G, Junium CK, Izon G, Ono S, Beukes NJ, Algeo TJ, Cui Y, Xie S, Summons RE (2018)

- 765 Nitrogen fixation sustained productivity in the wake of the Palaeoproterozoic Great Oxygenation  
766 Event. *Nature Communications* **9**, 978.
- 767 Lyons TW, Reinhard CT, Planavsky NJ (2014) The rise of oxygen in Earth's early ocean and  
768 atmosphere. *Nature* **506**, 307–315.
- 769 Magnabosco C, Moore KR, Wolfe JM, Fournier GP (2018) Dating phototrophic microbial  
770 lineages with reticulate gene histories. *Geobiology* **16**, 179–189.
- 771 Marty B, Zimmermann L, Pujol M, Burgess R, Philippot P (2013) Nitrogen isotopic composition  
772 and density of the Archean atmosphere. *Science* **342**, 101–104.
- 773 Mather TA, Pyle DM, Allen AG (2004) Volcanic source for fixed nitrogen in the early Earth's  
774 atmosphere. *Geology* **32**, 905.
- 775 McGlynn SE, Boyd ES, Peters JW, Orphan VJ (2012) Classifying the metal dependence of  
776 uncharacterized nitrogenases. *Frontiers in microbiology* **3**, 419.
- 777 McInerney JO, McNally A, O'Connell MJ (2017) Why prokaryotes have pangenomes. *Nature*  
778 *Microbiology* **2**, 17040.
- 779 Mendler K, Chen H, Parks DH, Lobb B, Hug LA, Doxey AC (2019) AnnoTree: visualization  
780 and exploration of a functionally annotated microbial tree of life. *Nucleic Acids Research* **47**,  
781 4442–4448.
- 782 Michiels CC, Darchambeau F, Roland FAE, Morana C, Llíros M, García-Armisen T, Thamdrup  
783 B, Borges A V., Canfield DE, Servais P, Descy J-P, Crowe SA (2017) Iron-dependent nitrogen  
784 cycling in a ferruginous lake and the nutrient status of Proterozoic oceans. *Nature Geoscience*  
785 **10**, 217–221.
- 786 Miller RW, Eady RR (1988) Molybdenum and vanadium nitrogenases of *Azotobacter*  
787 *chroococcum*. Low temperature favours N<sub>2</sub> reduction by vanadium nitrogenase. *Biochemical*  
788 *Journal* **256**, 429–432.
- 789 Mirkin BG, Fenner TI, Galperin MY, Koonin E V (2003) Algorithms for computing  
790 parsimonious evolutionary scenarios for genome evolution, the last universal common ancestor  
791 and dominance of horizontal gene transfer in the evolution of prokaryotes. *BMC Evolutionary*  
792 *Biology* **3**, 2.
- 793 Mojzsis SJ, Arrhenius G, McKeegan KD, Harrison TM, Nutman AP, Friend CRL (1996)  
794 Evidence for life on Earth before 3,800 million years ago. *Nature* **384**, 55–59.
- 795 Moore EK, Hao J, Spielman SJ, Yee N (2020) The evolving redox chemistry and bioavailability

- 796 of vanadium in deep time. *Geobiology* **18**, 127–138.
- 797 Moore EK, Jelen BI, Giovannelli D, Raanan H, Falkowski PG (2017) Metal availability and the  
798 expanding network of microbial metabolisms in the Archaean eon. *Nature Geoscience* **10**, 629–  
799 636.
- 800 Moulana A, Anderson RE, Fortunato CS, Huber JA (2020) Selection is a significant driver of  
801 gene gain and loss in the pangenome of the bacterial genus *Sulfurovum* in geographically distinct  
802 deep-sea hydrothermal vents. *mSystems*.
- 803 Mus F, Alleman AB, Pence N, Seefeldt LC, Peters JW (2018) Exploring the alternatives of  
804 biological nitrogen fixation. *Metallomics* **10**, 523–538.
- 805 Mus F, Colman DR, Peters JW, Boyd ES (2019) Geobiological feedbacks, oxygen, and the  
806 evolution of nitrogenase. *Free Radical Biology and Medicine*.
- 807 Navarro-González R, McKay CP, Mvondo DN (2001) A possible nitrogen crisis for Archaean  
808 life due to reduced nitrogen fixation by lightning. *Nature* **412**, 61–64.
- 809 Noffke N, Beukes N, Bower D, Hazen RM, Swift DJP (2007) An actualistic perspective into  
810 Archean worlds - (cyano-)bacterially induced sedimentary structures in the siliciclastic Nhlazatse  
811 Section, 2.9 Ga Pongola Supergroup, South Africa. *Geobiology* **6**, 5–20.
- 812 Nutman AP, Bennett VC, Friend CRL, Kranendonk MJ Van, Chivas AR (2016) Rapid  
813 emergence of life shown by discovery of 3,700-million-year-old microbial structures. *Nature*  
814 **537**, 535–538.
- 815 Ogata H, Goto S, Sato K, Fujibuchi W, Bono H, Kanehisa M (1999) KEGG: Kyoto  
816 Encyclopedia of Genes and Genomes. *Nucleic Acids Research* **27**, 29–34.
- 817 Olson SL, Kump LR, Kasting JF (2013) Quantifying the areal extent and dissolved oxygen  
818 concentrations of Archean oxygen oases. *Chemical Geology* **362**, 35–43.
- 819 Ossa Ossa F, Hofmann A, Spangenberg JE, Poulton SW, Stüeken EE, Schoenberg R, Eickmann  
820 B, Wille M, Butler M, Bekker A (2019) Limited oxygen production in the Mesoarchean ocean.  
821 *Proceedings of the National Academy of Sciences of the United States of America* **116**, 6647–  
822 6652.
- 823 Pang K, Tang Q, Chen L, Wan B, Niu C, Yuan X, Xiao S (2018) Nitrogen-Fixing Heterocystous  
824 Cyanobacteria in the Tonian Period. *Current Biology* **28**, 616–622.
- 825 Pang K, Tang Q, Schiffbauer JD, Yao J, Yuan X, Wan B, Chen L, Ou Z, Xiao S (2013) The  
826 nature and origin of nucleus-like intracellular inclusions in Paleoproterozoic eukaryote



- 827 microfossils. *Geobiology* **11**, 499–510.
- 828 Planavsky NJ, Asael D, Hofmann A, Reinhard CT, Lalonde S V, Knudsen A, Wang X, Ossa  
829 Ossa F, Pecoits E, Smith AJB, Beukes NJ, Bekker A, Johnson TM, Konhauser KO, Lyons TW,  
830 Rouxel OJ (2014) Evidence for oxygenic photosynthesis half a billion years before the Great  
831 Oxidation Event. *Nature Geoscience* **7**, 283–286.
- 832 Polz MF, Alm EJ, Hanage WP (2013) Horizontal gene transfer and the evolution of bacterial and  
833 archaeal population structure. *Trends in Genetics* **29**, 170–5.
- 834 Popa O, Hazkani-Covo E, Landan G, Martin W, Dagan T (2011) Directed networks reveal  
835 genomic barriers and DNA repair bypasses to lateral gene transfer among prokaryotes. *Genome*  
836 *research* **21**, 599–609.
- 837 Raymond J, Siefert JL, Staples CR, Blankenship RE (2004) The natural history of nitrogen  
838 fixation. *Molecular Biology and Evolution* **21**, 541–54.
- 839 Reinhard CT, Planavsky NJ, Robbins LJ, Partin CA, Gill BC, Lalonde S V., Bekker A,  
840 Konhauser KO, Lyons TW (2013) Proterozoic ocean redox and biogeochemical stasis.  
841 *Proceedings of the National Academy of Sciences* **110**, 5357–5362.
- 842 Ren M, Feng X, Huang Y, Wang H, Hu Z, Clingenpeel S, Swan BK, Fonseca MM, Posada D,  
843 Stepanauskas R, Hollibaugh JT, Foster PG, Woyke T, Luo H (2019) Phylogenomics suggests  
844 oxygen availability as a driving force in Thaumarchaeota evolution. *The ISME Journal* **13**,  
845 2150–2161.
- 846 Revell LJ (2012) phytools: an R package for phylogenetic comparative biology (and other  
847 things). *Methods in Ecology and Evolution* **3**, 217–223.
- 848 Roberson AL, Roadt J, Halevy I, Kasting JF (2011) Greenhouse warming by nitrous oxide and  
849 methane in the Proterozoic Eon. *Geobiology* **9**, 313–320.
- 850 Rosing MT (1999)  $^{13}\text{C}$ -Depleted carbon microparticles in  $\sim 3700$ -Ma sea-floor sedimentary  
851 rocks from west greenland. *Science (New York, N.Y.)* **283**, 674–6.
- 852 Sánchez-Baracaldo P, Ridgwell A, Raven JA (2014) A neoproterozoic transition in the marine  
853 nitrogen cycle. *Current Biology* **24**, 652–657.
- 854 Santos PC Dos, Fang Z, Mason SW, Setubal JC, Dixon R (2012) Distribution of nitrogen  
855 fixation and nitrogenase-like sequences amongst microbial genomes. *BMC Genomics* **13**, 162.
- 856 Schidlowski M (1988) A 3,800-million-year isotopic record of life from carbon in sedimentary  
857 rocks. *Nature* **333**, 313–318.



- 858 Schidlowski M, Hayes JM, Kaplan IR (1983) Isotopic inferences of ancient biochemistries:  
859 Carbon, sulfur, hydrogen, and nitrogen. In: *Earth's Earliest Biosphere, Its Origin and Evolution*  
860 (ed. Schopf JW). Princeton University Press, Princeton, N.J., pp. 149–186.
- 861 Schoepp-Cothenet B, Lis R van, Atteia A, Baymann F, Capowicz L, Ducluzeau A-L, Duval S,  
862 Brink F ten, Russell MJ, Nitschke W (2013) On the universal core of bioenergetics. *Biochimica*  
863 *et Biophysica Acta (BBA) - Bioenergetics* **1827**, 79–93.
- 864 Schwartz JH, Maresca B (2006) Do Molecular Clocks Run at All? A Critique of Molecular  
865 Systematics. *Biological Theory* **1**, 357–371.
- 866 Scott C, Lyons TW, Bekker A, Shen Y, Poulton SW, Chu X, Anbar AD (2008) Tracing the  
867 stepwise oxygenation of the Proterozoic ocean. *Nature* **452**, 456–459.
- 868 Shang M, Tang D, Shi X, Zhou L, Zhou X, Song H, Jiang G (2019) A pulse of oxygen increase  
869 in the early Mesoproterozoic ocean at ca. 1.57–1.56 Ga. *Earth and Planetary Science Letters*  
870 **527**, 115797.
- 871 Som SM, Buick R, Hagadorn JW, Blake TS, Perreault JM, Harnmeijer JP, Catling DC (2016)  
872 Earth's air pressure 2.7 billion years ago constrained to less than half of modern levels. *Nature*  
873 *Geoscience* **9**, 448–451.
- 874 Stamatakis A (2014) RAxML version 8: a tool for phylogenetic analysis and post-analysis of  
875 large phylogenies. *Bioinformatics* **30**, 1312–1313.
- 876 Stanton CL, Reinhard CT, Kasting JF, Ostrom NE, Haslun JA, Lyons TW, Glass JB (2018)  
877 Nitrous oxide from chemodenitrification □: A possible missing link in the Proterozoic  
878 greenhouse and the evolution of aerobic respiration 1–13.
- 879 Stein LY, Klotz MG (2016) The nitrogen cycle. *Current Biology* **26**, R94–R98.
- 880 Stolz JF, Basu P (2002) Evolution of Nitrate Reductase: Molecular and Structural Variations on  
881 a Common Function. *ChemBioChem* **3**, 198–206.
- 882 Stüeken EE, Buick R, Guy BM, Koehler MC (2015) Isotopic evidence for biological nitrogen  
883 fixation by molybdenum-nitrogenase from 3.2 Gyr. *Nature*.
- 884 Stüeken EE, Catling DC, Buick R (2012) Contributions to late Archaean sulphur cycling by life  
885 on land. *Nature Geoscience* **5**, 722–725.
- 886 Stüeken EE, Kipp MA, Koehler MC, Buick R (2016a) The evolution of Earth's biogeochemical  
887 nitrogen cycle. *Earth-Science Reviews* **160**, 220–239.
- 888 Stüeken EE, Kipp MA, Koehler MC, Schwieterman EW, Johnson B, Buick R (2016b) Modeling

- 889  $p N_2$  through Geological Time: Implications for Planetary Climates and Atmospheric  
890 Biosignatures. *Astrobiology* **16**, 949–963.
- 891 Summers DP, Chang S (1993) Prebiotic ammonia from reduction of nitrite by iron (II) on the  
892 early Earth. *Nature* **365**, 630–633.
- 893 The Uniprot Consortium (2017) UniProt: the universal protein knowledgebase. *Nucleic Acids*  
894 *Research* **45**, D158–D169.
- 895 Voss M, Bange HW, Dippner JW, Middelburg JJ, Montoya JP, Ward B (2013) The marine  
896 nitrogen cycle: recent discoveries, uncertainties and the potential relevance of climate change.  
897 *Philosophical Transactions of the Royal Society B: Biological Sciences* **368**, 20130121–  
898 20130121.
- 899 Wada E, Hatton A (1971) Nitrite metabolism in the euphotic layer of the central North Pacific  
900 Ocean. *Limnology and Oceanography* **16**, 766–772.
- 901 Waterhouse AM, Procter JB, Martin DMA, Clamp M, Barton GJ (2009) Jalview Version 2--a  
902 multiple sequence alignment editor and analysis workbench. *Bioinformatics* **25**, 1189–1191.
- 903 Weiss MC, Sousa FL, Mrnjavac N, Neukirchen S, Roettger M, Nelson-Sathi S, Martin WF  
904 (2016) The physiology and habitat of the last universal common ancestor. *Nature Microbiology*  
905 **1**, 16116.
- 906 Yang J, Junium CK, Grassineau N V., Nisbet EG, Izon G, Mettam C, Martin A, Zerkle AL  
907 (2019) Ammonium availability in the Late Archaean nitrogen cycle. *Nature Geoscience* **12**, 553–  
908 557.
- 909 Zaremba-Niedzwiedzka K, Caceres EF, Saw JH, Bäckström D, Juzokaite L, Vancaester E, Seitz  
910 KW, Anantharaman K, Starnawski P, Kjeldsen KU, Stott MB, Nunoura T, Banfield JF,  
911 Schramm A, Baker BJ, Spang A, Ettema TJG (2017) Asgard archaea illuminate the origin of  
912 eukaryotic cellular complexity. *Nature* **541**, 353–358.
- 913 Zerkle AL, Mikhail S (2017) The geobiological nitrogen cycle: From microbes to the mantle.  
914 *Geobiology*.
- 915 Zerkle AL, Poulton SW, Newton RJ, Mettam C, Claire MW, Bekker A, Junium CK (2017a)  
916 Onset of the aerobic nitrogen cycle during the Great Oxidation Event. *Nature* **542**, 465–467.
- 917 Zerkle AL, Poulton SW, Newton RJ, Mettam C, Claire MW, Bekker A, Junium CK (2017b)  
918 Onset of the aerobic nitrogen cycle during the Great Oxidation Event. *Nature* **542**, 465–467.
- 919 Zhang K, Zhu X, Wood RA, Shi Y, Gao Z, Poulton SW (2018) Oxygenation of the

920 Mesoproterozoic ocean and the evolution of complex eukaryotes. *Nature Geoscience* **11**, 345–  
921 350.  
922  
923  
924

925 **Tables**

| Calibration Event                                                | Date (Mya)     | Refs                                                                                                                                                     |
|------------------------------------------------------------------|----------------|----------------------------------------------------------------------------------------------------------------------------------------------------------|
| LUCA (set as root prior)                                         | 3800, 200 S.D. | Schidlowski <i>et al.</i> , 1983; Schidlowski, 1988; Mojzsis <i>et al.</i> , 1996; Rosing, 1999; Czaja <i>et al.</i> , 2013; Nutman <i>et al.</i> , 2016 |
| Origin of Methanogenesis                                         | >2700          | Eigenbrode & Freeman, 2006                                                                                                                               |
| Origin of Cyanobacteria                                          | >2450          | Bekker <i>et al.</i> , 2004                                                                                                                              |
| Origin of Eukaryotes                                             | >1700          | Pang <i>et al.</i> , 2013                                                                                                                                |
| Origin of plastids/Rhodophytes diverge                           | >1050          | Gibson <i>et al.</i> , 2018                                                                                                                              |
| Akinetes diverge from cyanobacteria lacking cell differentiation | >1000          | Pang <i>et al.</i> , 2018                                                                                                                                |

926 **Table 1.** Fossil calibration points used in Phylobayes runs. Calibration points were set as the  
 927 hard constraint indicating the latest date by which a specific clade split. The selected time points  
 928 reflect the dates for which there is the most consensus.

| Gene        | Number of genes identified |
|-------------|----------------------------|
| <i>amo</i>  | 4                          |
| <i>anfD</i> | 11                         |
| <i>anfK</i> | 10                         |
| <i>hao</i>  | 0                          |
| <i>napA</i> | 37                         |
| <i>narG</i> | 34                         |
| <i>nasA</i> | 28                         |
| <i>nifD</i> | 165                        |
| <i>nifK</i> | 92                         |
| <i>nifH</i> | 233                        |
| <i>nirB</i> | 39                         |
| <i>nirK</i> | 10                         |
| <i>nirS</i> | 16                         |
| <i>norB</i> | 36                         |
| <i>nosZ</i> | 21                         |
| <i>nrfA</i> | 48                         |
| <i>nxrA</i> | 34                         |
| <i>vnfD</i> | 6                          |
| <i>vnfK</i> | 6                          |

929 **Table 2.** Number of nitrogen-cycling genes identified within 254 bacterial and archaeal genomes  
 930 that were included in the analysis. All genes were identified from ORFs using blastp with an e-  
 931 value cutoff of 1e-12, then filtered using the Kofam Koala tool. Nitrogenases were further  
 932 refined by identifying key residues (see Methods).  
 933  
 934

| Gene        | CIR Clock Model |            |      |             | UGAM Clock Model |            |      |             |
|-------------|-----------------|------------|------|-------------|------------------|------------|------|-------------|
|             | HGT             | Speciation | Loss | Duplication | HGT              | Speciation | Loss | Duplication |
| <i>anfD</i> | 7               | 7          | 4    | 0           | 7                | 7          | 4    | 0           |
| <i>anfK</i> | 6               | 7          | 4    | 0           | 6                | 7          | 4    | 0           |
| <i>napA</i> | 13              | 46         | 23   | 0           | 12               | 50         | 26   | 0           |
| <i>narG</i> | 15              | 29         | 15   | 4           | 14               | 32         | 17   | 4           |
| <i>nasA</i> | 5               | 27         | 6    | 1           | 5                | 27         | 6    | 1           |
| <i>nifD</i> | 48              | 176        | 60   | 0           | 51               | 169        | 56   | 0           |
| <i>nifK</i> | 35              | 103        | 48   | 1           | 34               | 107        | 51   | 1           |
| <i>nifH</i> | 68              | 224        | 72   | 12          | 74               | 202        | 56   | 12          |
| <i>nirB</i> | 14              | 34         | 13   | 3           | 13               | 38         | 16   | 3           |
| <i>nirK</i> | 4               | 9          | 5    | 1           | 4                | 9          | 5    | 1           |
| <i>nirS</i> | 7               | 13         | 6    | 1           | 7                | 13         | 6    | 1           |
| <i>norB</i> | 26              | 13         | 5    | 2           | 25               | 13         | 5    | 2           |
| <i>nosZ</i> | 13              | 5          | 0    | 2           | 13               | 5          | 0    | 2           |
| <i>nfA</i>  | 24              | 34         | 13   | 2           | 23               | 37         | 15   | 2           |
| <i>nxA</i>  | 13              | 34         | 18   | 4           | 13               | 34         | 18   | 4           |
| <i>vnfD</i> | 3               | 3          | 1    | 0           | 3                | 3          | 1    | 0           |
| <i>vnfK</i> | 3               | 3          | 1    | 0           | 3                | 3          | 1    | 0           |

935  
936  
937  
938

**Table 3.** Frequencies of events inferred by AnGST for each gene as derived from both the CIR and UGAM clock models.

| Gene        | Upper node date | 95% confidence interval | Lower node date | 95% confidence interval | Midpoint between nodes | Geologic era     |
|-------------|-----------------|-------------------------|-----------------|-------------------------|------------------------|------------------|
| <i>vnfD</i> | 1445.24         | 1052.37, 1735.83        | 482.23          | 210.11, 778.444         | <b>963.73</b>          | Neoproterozoic   |
| <i>vnfK</i> | 1445.24         | 1052.37, 1735.83        | 482.23          | 210.11, 778.444         | <b>963.73</b>          | Neoproterozoic   |
| <i>nosZ</i> | 1325.57         | 1048.93, 1588.52        | 1139.65         | 851.174, 1408.81        | <b>1232.61</b>         | Mesoproterozoic  |
| <i>nirK</i> | 1452.66         | 1193.07, 1706.53        | 1343.08         | 1094.21, 1585.92        | <b>1397.87</b>         | Mesoproterozoic  |
| <i>nirS</i> | 1913.87         | 1694.13, 2144.31        | 1423.17         | 1153.32, 1677.23        | <b>1668.52</b>         | Paleoproterozoic |
| <i>norB</i> | 1913.87         | 1694.13, 2144.31        | 1423.17         | 1153.32, 1677.23        | <b>1668.52</b>         | Paleoproterozoic |
| <i>anfD</i> | 2349.58         | 2153.39, 2583.93        | 1745.53         | 1498.39, 1999.54        | <b>2047.55</b>         | Paleoproterozoic |
| <i>anfK</i> | 2349.58         | 2153.39, 2583.93        | 1745.53         | 1498.39, 1999.54        | <b>2047.55</b>         | Paleoproterozoic |

|             |         |                     |         |                     |                |                         |
|-------------|---------|---------------------|---------|---------------------|----------------|-------------------------|
| <b>nasA</b> | 2540.50 | 2351.4,<br>2778.03  | 2063.23 | 1848.31,<br>2293.91 | <b>2301.87</b> | <b>Paleoproterozoic</b> |
| <b>nrfA</b> | 2454.68 | 2178.51,<br>2737.37 | 2267.54 | 1918.96,<br>2574.71 | <b>2361.11</b> | <b>Paleoproterozoic</b> |
| <b>nirB</b> | 2748.37 | 2545.88,<br>2989.62 | 2603.25 | 2384.99,<br>2850.17 | <b>2675.81</b> | <b>Neoproterozoic</b>   |
| <b>nifK</b> | 2926.54 | 2734.92,<br>3180.11 | 2629.22 | 2415.05,<br>2877.89 | <b>2777.88</b> | <b>Neoproterozoic</b>   |
| <b>nxrA</b> | 2816.89 | 2630.27,<br>3063.26 | 2787.46 | 2603.09,<br>3029.43 | <b>2802.17</b> | <b>Mesoproterozoic</b>  |
| <b>napA</b> | 2816.89 | 2630.27,<br>3063.26 | 2787.46 | 2603.09,<br>3029.43 | <b>2802.17</b> | <b>Mesoproterozoic</b>  |
| <b>narG</b> | 2816.89 | 2630.27,<br>3063.26 | 2787.46 | 2603.09,<br>3029.43 | <b>2802.17</b> | <b>Mesoproterozoic</b>  |
| <b>nifD</b> | 2934.72 | 2744.91,<br>3187.67 | 2869.82 | 2682.33,<br>3118.74 | <b>2902.27</b> | <b>Mesoproterozoic</b>  |
| <b>nifH</b> | 3060.98 | 2863.64,<br>3325.02 | 3026.38 | 2832.29,<br>3286.79 | <b>3043.68</b> | <b>Mesoproterozoic</b>  |

939 **Table 4.** Inferred birth dates for nitrogen-cycling genes based on the chronogram generated  
 940 using the CIR clock model with conservative calibration points. All gene birth events are  
 941 inferred to occur between nodes on the species chronogram, and therefore our methods do not  
 942 allow us to infer specific dates for gene birth events. Here we list the inferred timing for the  
 943 earliest possible timing (upper node) and latest possible timing (lower node) with 95%  
 944 confidence intervals as reported by PhyloBayes, as well as the calculated midpoint between the  
 945 two node times. Times are reported in millions of years ago. The geological era reported in the  
 946 right column corresponds to the midpoint between the upper and lower node. Given the  
 947 uncertainty inherent in the estimation of node timings and inference in events, these are provided  
 948 for geological reference and should not be taken as definitive timings. The equivalent table,  
 949 generated using the UGAM clock model, is depicted as Supplementary Table 2.

950  
 951 **Figure Captions**

952  
 953 **Figure 1. Schematic of the biological nitrogen cycle.** Arrows are labelled with the pathway to  
 954 which they belong. All genes examined in this study are labeled next to the step they catalyze.  
 955 Genes without sufficient data for subsequent analysis are labeled in grey. Adapted from Canfield  
 956 et al. (2010).

957  
 958 **Figure 2. Species tree used for phylogenetic analysis.** Maximum likelihood phylogeny based  
 959 on an alignment of concatenated single-copy universal proteins from 308 genomes. Well-  
 960 represented bacterial and archaeal phyla are labelled in black text. Bacterial clades are labeled in



961 alternating colors of blue, archaea in green, eukaryotes in red. Bootstrap values (from 100  
962 bootstraps) greater than 50 are shown as transparent gray circles, with larger circles representing  
963 higher bootstrap values.

964

965 **Figure 3. Histograms and density plots of all speciation, loss, duplication and horizontal**  
966 **gene transfer (HGT) events.** All events are shown in blue, HGT events alone are shown in  
967 green. Events were inferred by reconciling phylogenetic trees of nitrogen-cycling genes with a  
968 chronogram generated using a CIR clock model and conservative calibration points. Y-axis  
969 represents proportion of all events (blue) or HGT events only (green). Borders around graphs  
970 indicate the metabolic process that the gene is involved in. Histograms are ordered according to  
971 the earliest time point at which a speciation, loss, duplication, or HGT event occurred. An  
972 equivalent figure with dates inferred from the UGAM clock model is shown in Supplementary  
973 Figure 3.

974

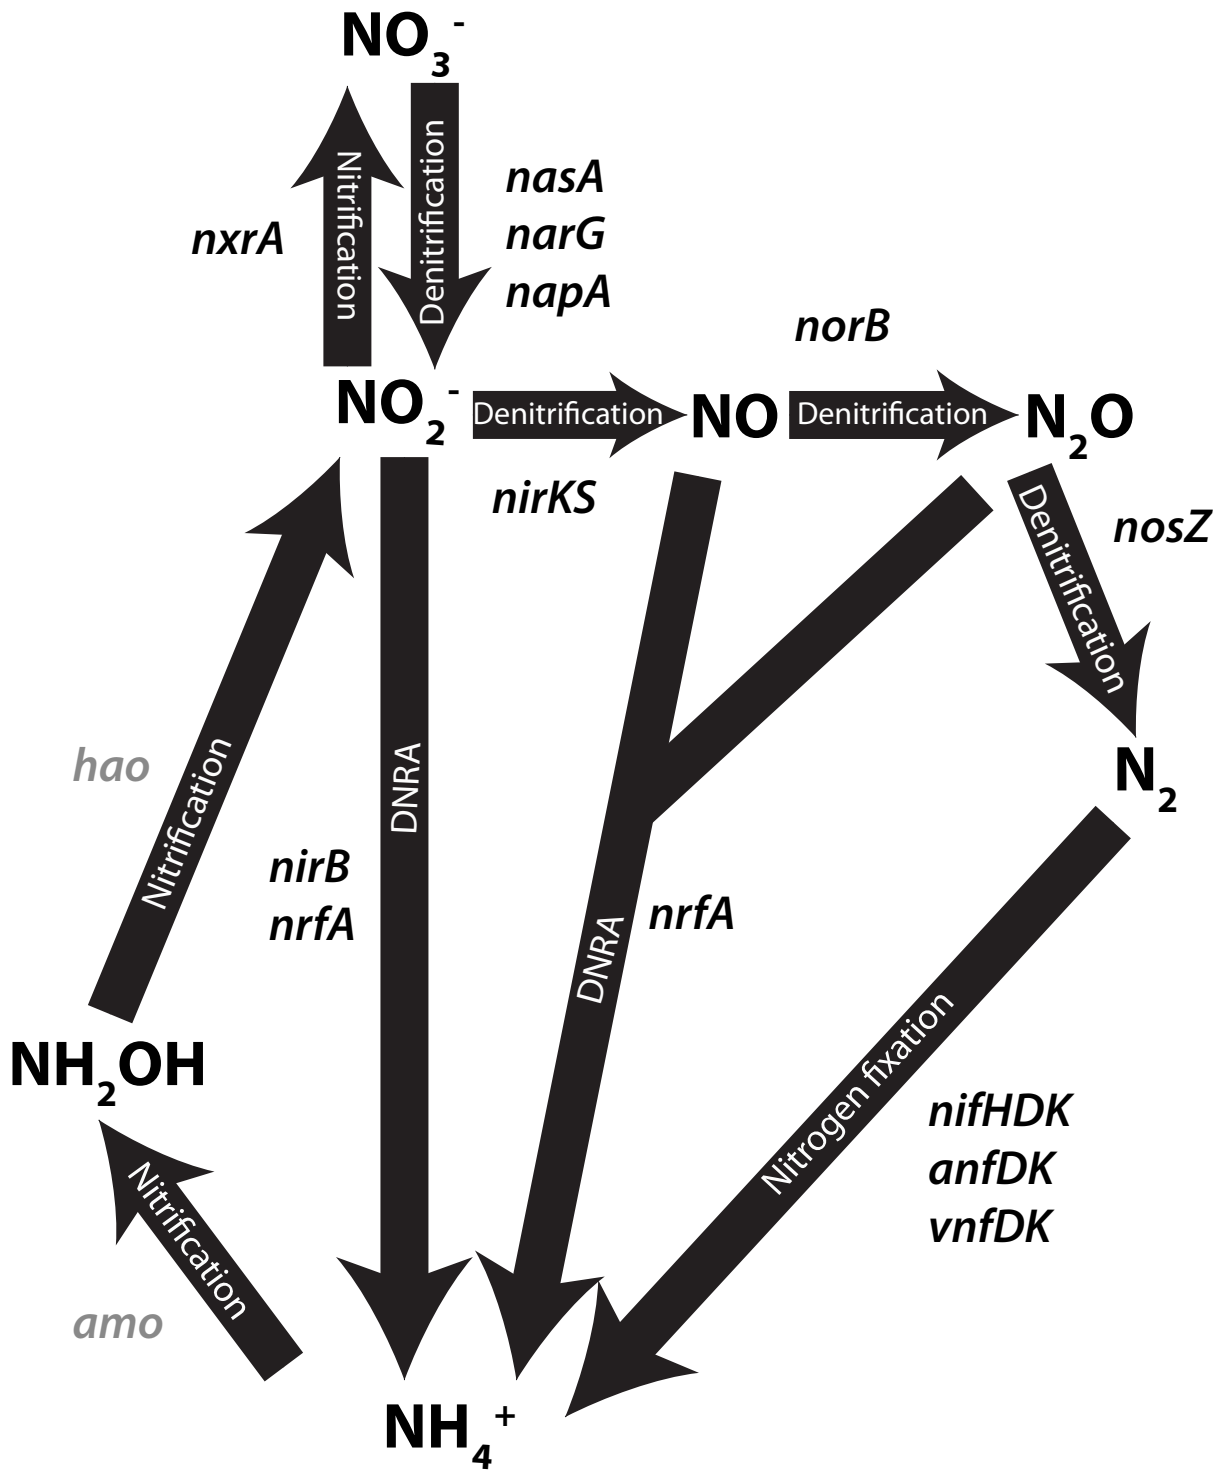

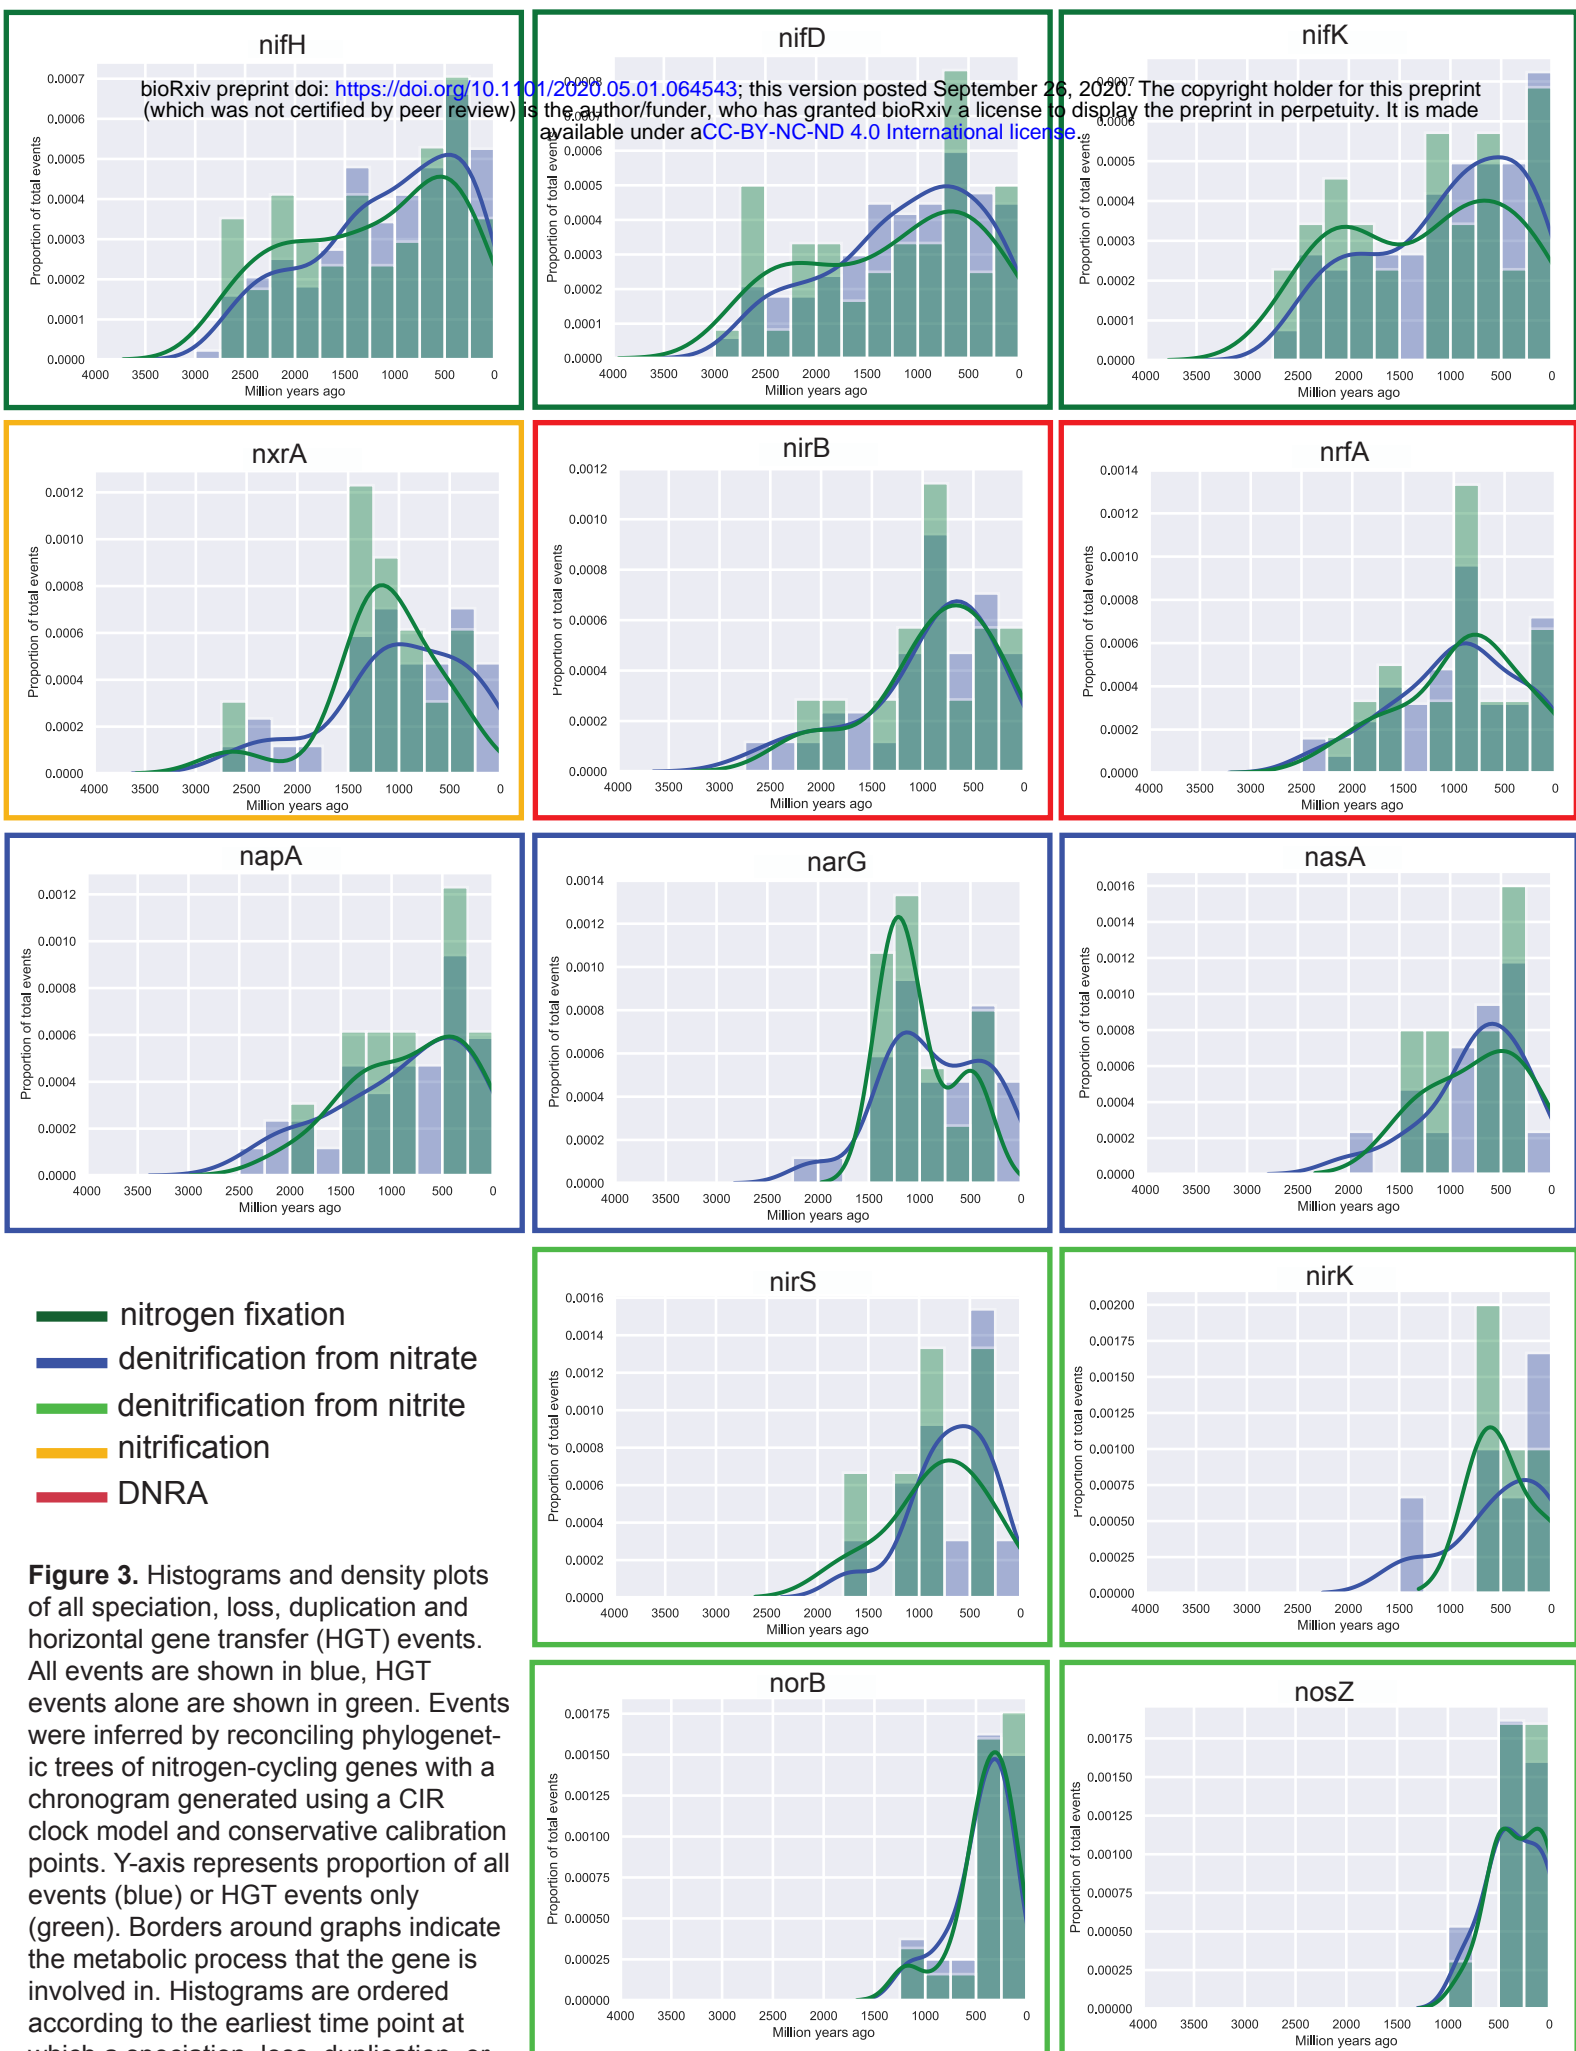



Tree scale: 1

**Archaea**

Methanomicrobia

**Eukarya**

Methanococci

Methanobacteria

bioRxiv preprint doi: <https://doi.org/10.1101/2020.05.01.064543>; this version posted September 26, 2020. The copyright holder for this preprint (which was not certified by peer review) is the author/funder, who has granted bioRxiv a license to display the preprint in perpetuity. It is made available under aCC-BY-NC-ND 4.0 International license.

Asgard Archaea

**Gammaproteobacteria**

**Cyanobacteria**

**Betaproteobacteria**

**Candidate Phyla Radiation**

**Alphaproteobacteria**

**Firmicutes**

**Epsilonproteobacteria**

**Tenericutes**

**Bacteria**

**Deltaproteobacteria**

**Spirochaetes**

**Elusimicrobia**

**PVC superphylum + Omnitrophica**

**Chlorobi**

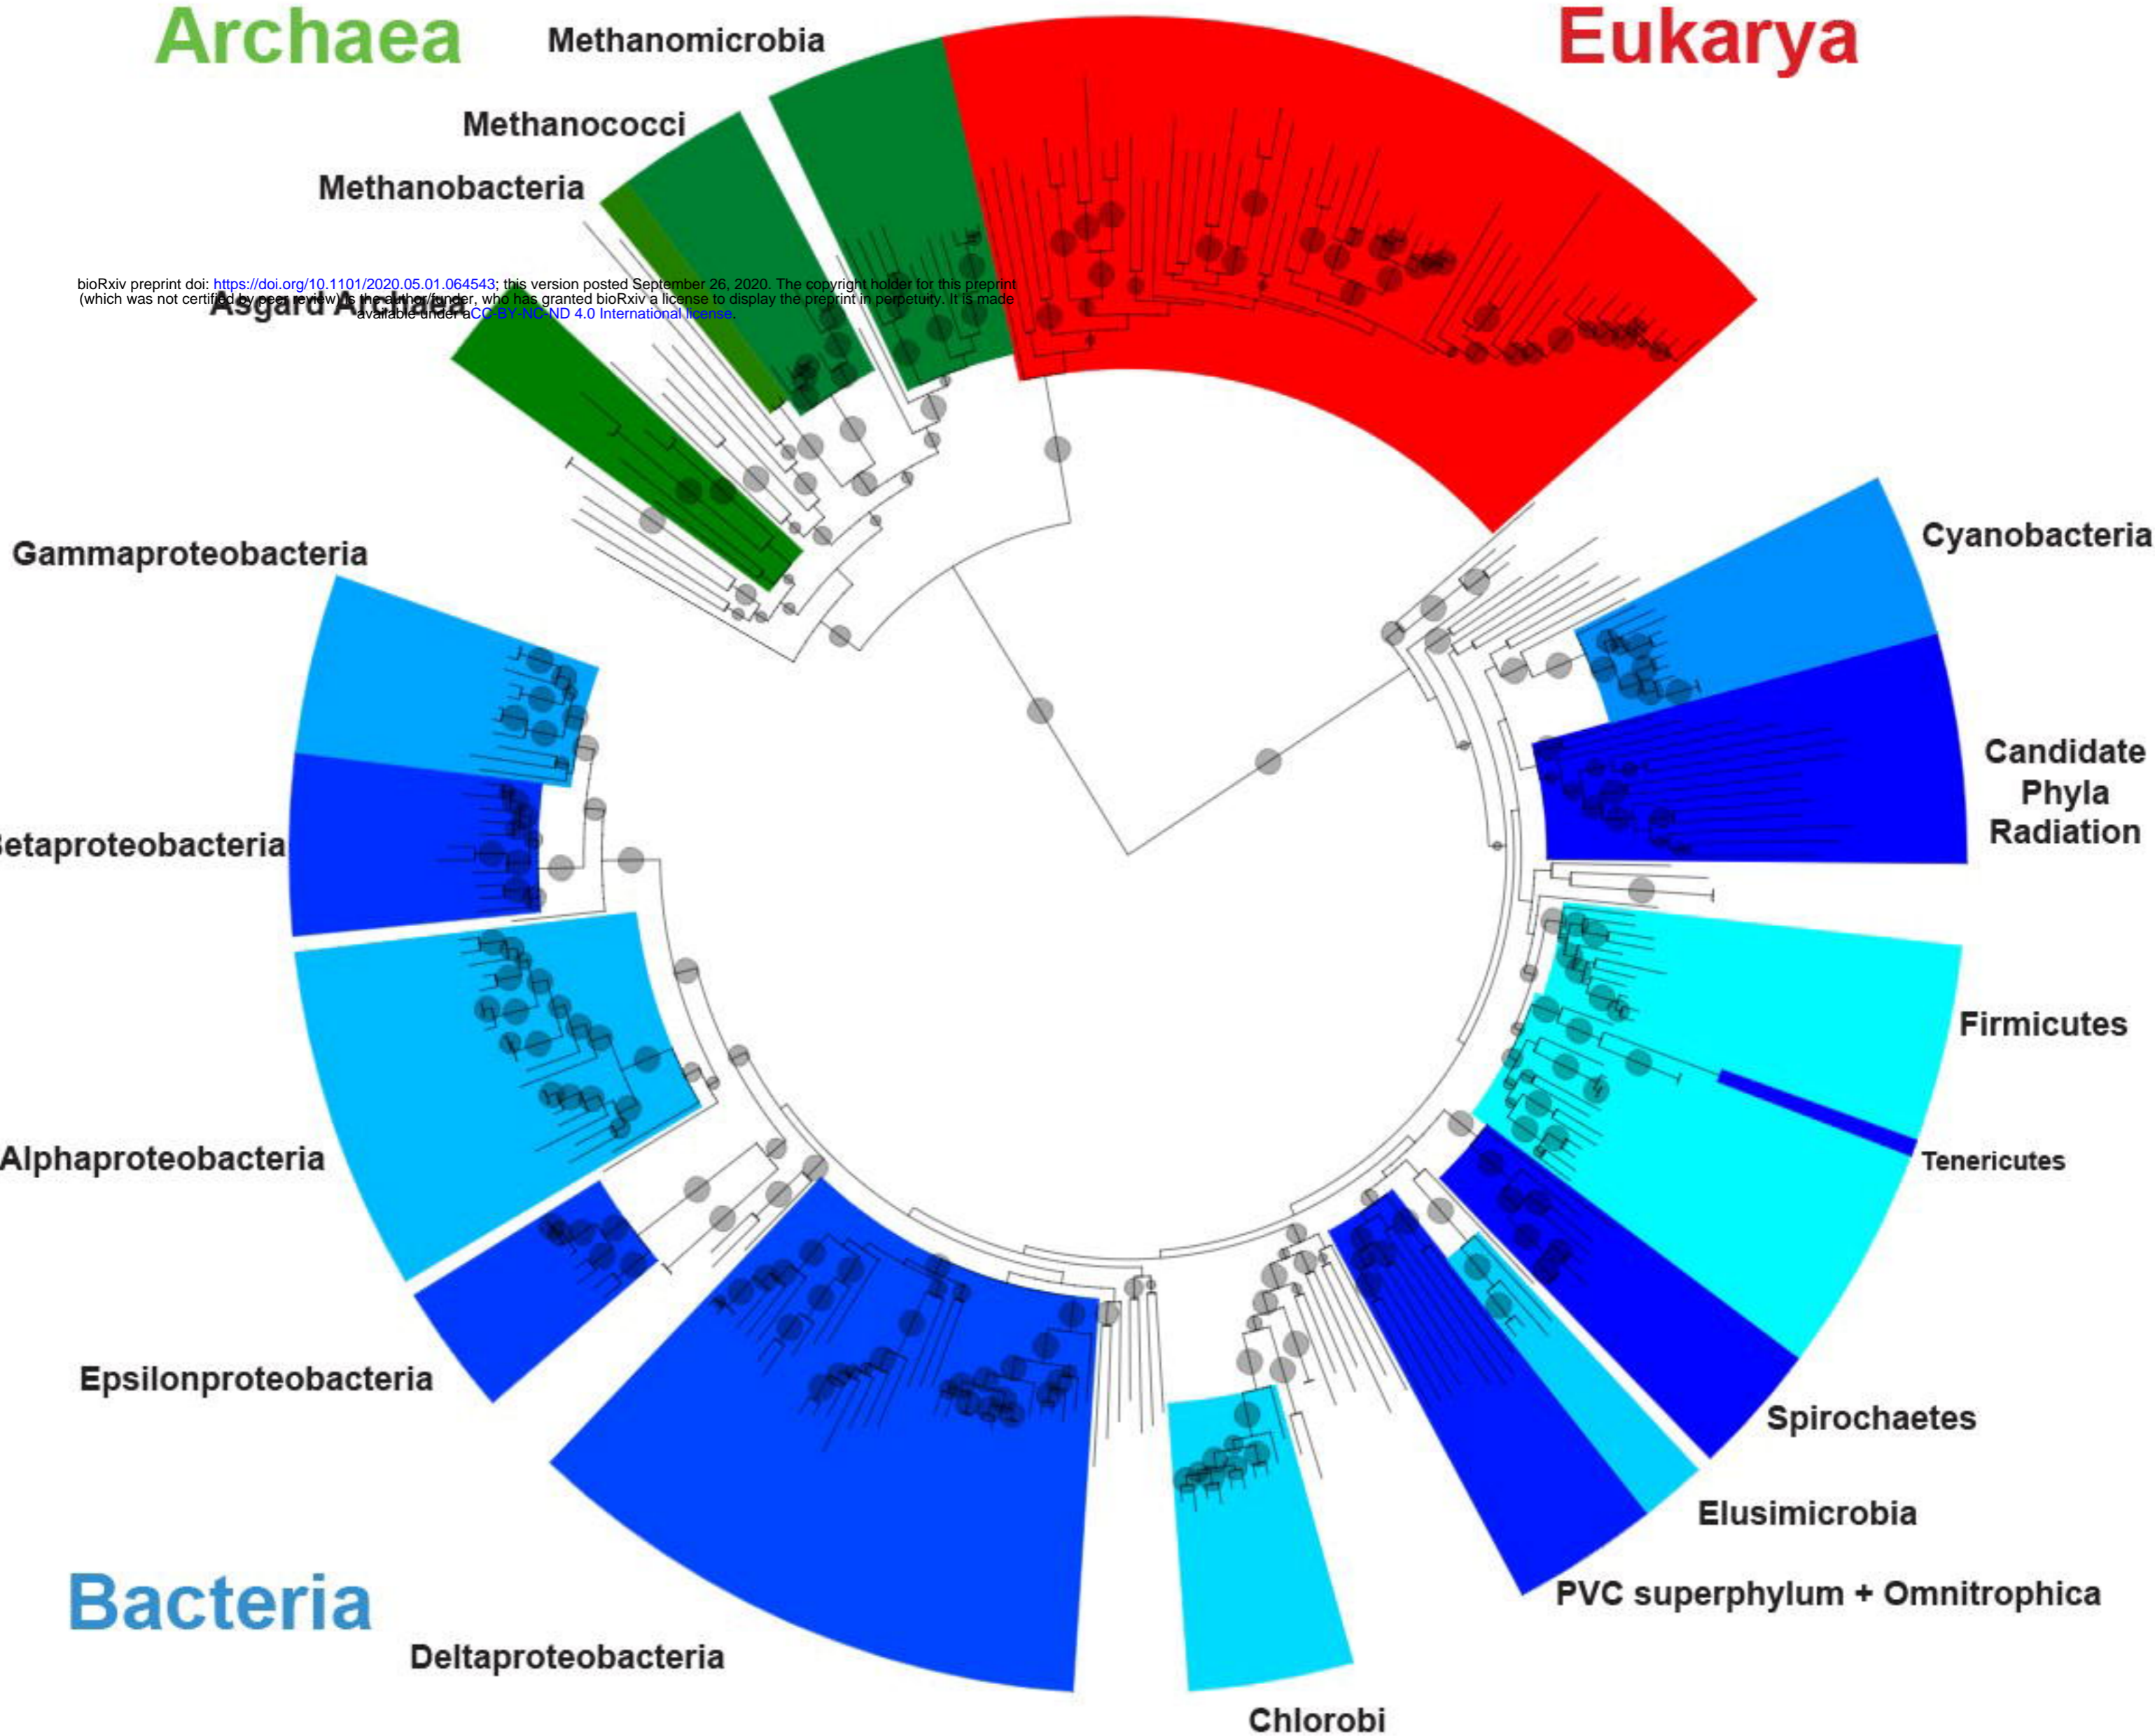

Source: https://www.biorxiv.org/content/10.1101/2020.05.01.064543v3.full.pdf
