# Radiation of nitrogen-metabolizing enzymes across the tree of life tracks environmental transitions in Earth history

Chris Parsons<sup>1,2</sup>, Eva Stüeken<sup>3,4</sup>, Caleb Rosen<sup>1</sup>, Katherine Mateos<sup>1</sup> and Rika Anderson<sup>1,4</sup>

<sup>1</sup> Carleton College, Northfield, MN, USA

<sup>2</sup> Massachusetts Institute of Technology, Cambridge, MA, USA

<sup>3</sup> University of St. Andrews, St. Andrews, Scotland, UK

<sup>4</sup> NASA NExSS Virtual Planetary Laboratory, University of Washington, Box 351580, Seattle, USA

## Abstract

Nitrogen is an essential element to life and exerts a strong control on global biological productivity. The rise and spread of nitrogen-utilizing microbial metabolisms profoundly shaped the biosphere on the early Earth. Here we reconciled gene and species trees to identify birth and horizontal gene transfer events for key nitrogen-cycling genes, dated with a time-calibrated tree of life, in order to examine the timing of the proliferation of these metabolisms across the tree of life. Our results provide new insights into the evolution of the early nitrogen cycle that expand on geochemical reconstructions. We observed widespread horizontal gene transfer of molybdenum-based nitrogenase back to the Archean, minor horizontal transfer of genes for nitrate reduction in the Archean, and an increase in the proliferation of genes metabolizing nitrite around the time of the Mesoproterozoic (~1.5 Ga). The latter coincides with recent geochemical evidence for a mid-Proterozoic rise in oxygen levels. Geochemical evidence of biological nitrate utilization in the Archean and early Proterozoic may reflect at least some contribution of dissimilatory nitrate reduction to ammonium (DNRA) rather than pure denitrification to N<sub>2</sub>. Our results thus help unravel the relative dominance of two metabolic pathways that are not distinguishable with current geochemical tools. Overall, our findings thus provide novel constraints for understanding the evolution of the nitrogen cycle over time and provide insights into the bioavailability of various nitrogen sources in the early Earth with possible implications for the emergence of eukaryotic life.

**Keywords:** nitrogen cycle; horizontal gene transfer; denitrification; microbial evolution; nitrogenase



## Introduction

Nitrogen is a critical element to life on Earth, important as an essential building block in the synthesis of biological molecules, and for its role in redox reactions for microbial energy metabolism. It is often a limiting nutrient in marine and terrestrial environments and likely had a significant influence on the evolutionary trajectory of the biosphere over Earth's history. The nitrogen cycle is largely controlled by a variety of microorganisms that enzymatically catalyze the reduction and oxidation of nitrogen at various redox states (Figure 1). Reconstructing the genetic proliferation of these enzymes across the tree of life through gene birth, duplication, loss, and horizontal gene transfer can therefore provide novel insights into the evolution of the biosphere and its productivity over time.

The most important steps in Earth's nitrogen cycle are largely catalyzed by microbes, including the first crucial step of reducing molecular nitrogen to bioavailable forms (Zerkle & Mikhail, 2017; Kuypers *et al.*, 2018). Nitrogen fixation is catalyzed by nitrogenase, of which there are three varieties, distinguished by the metals in their associated active site cofactors: Nif (Fe-Mo), Vnf (Fe-V), and Anf (Fe-Fe) (Joerger *et al.*, 1988; Miller & Eady, 1988) (Figure 1). The ability to fix nitrogen is spread across a wide range of archaeal and bacterial lineages, but does not occur in eukaryotes (Dos Santos *et al.*, 2012; Gaby & Buckley, 2014). Importantly, nitrogenase is strongly inhibited by oxygen, forcing nitrogen fixers to develop various means to reduce their intracellular oxygen concentrations or to confine themselves to suboxic environments (Gallon, 1981). Ammonium produced from nitrogen fixation or ammonification is converted to organic forms of fixed nitrogen by a variety of enzymes or, in the presence of oxygen, oxidized to nitrite ( $\text{NO}_2^-$ ) or nitrate ( $\text{NO}_3^-$ ) through the chemoautotrophic nitrification pathway via the enzymes Amo and Hao (Figure 1). In environments with insufficient  $\text{O}_2$  concentrations to support aerobic respiration, nitrate and nitrite can be utilized as alternative terminal electron acceptors through the denitrification pathway; consequently, denitrification rates are highest in suboxic conditions, including swamps and marine oxygen minimum zones (Canfield *et al.*, 2005; Löscher *et al.*, 2012; Voss *et al.*, 2013). Reduction of nitrate to nitrite, nitric oxide (NO), nitrous oxide ( $\text{N}_2\text{O}$ ) and dinitrogen ( $\text{N}_2$ ) is catalyzed by the Nas, Nar, Nap, Nir, Nor, and Nos enzymes, respectively. Dissimilatory nitrate reduction to ammonium (DNRA) also reduces nitrate via the enzymes Nar, Nap, Nir and Nrf (Figure 1), but this pathway retains fixed nitrogen as ammonium and may therefore have been a critical metabolism in nutrient-

starved ecosystems. DNRA, while less understood than denitrification, has been shown to be a major nitrate sink in a variety of aquatic systems, especially warm intertidal zones (Giblin *et al.*, 2013) and it may be dominant under ferruginous conditions, as suggested by modern analogue studies (Michiels *et al.*, 2017).

Given the importance of nitrogen as a building block of life, as an energy source for microbes, and as the most abundant element in the Earth's atmosphere, better constraining the evolutionary history of the nitrogen cycle is important for understanding, among other things, variation in global primary productivity and atmospheric pressure over time. The bioavailability and cycling of important limiting nutrients through Earth's history, including nitrogen, would have been important for biological productivity and the rise of early eukaryotic algae (Anbar & Knoll, 2002; Sánchez-Baracaldo *et al.*, 2014; Isson *et al.*, 2018). The relative abundance of nitrogenous gases in the atmosphere could also have had important implications for atmospheric pressure as well as planetary climate during the Archean. Potential changes in atmospheric pressure during the Archean may have resulted from biological N<sub>2</sub> drawdown (Som *et al.*, 2016), whereas the greenhouse gas nitrous oxide (N<sub>2</sub>O), produced as part of the nitrogen cycle via nitrification/denitrification, may have contributed to planetary warming when the Sun was younger and fainter (Buick, 2007; Roberson *et al.*, 2011; Stanton *et al.*, 2018). Finally, one of the most important questions for the early evolution of life is understanding when fixed nitrogen first became widely available, and through what means. Experimental data suggest that fixed nitrogen can be produced during lightning reactions and under hydrothermal conditions (e.g., Brandes *et al.*, 1998; Navarro-González *et al.*, 2001), and either or both of these sources were likely pivotal for the origin of life. However, the invention of biological N<sub>2</sub> fixation would have made Earth's biosphere less dependent on abiotic reactions and likely spurred primary productivity.

The question of how these metabolisms unfolded over Earth's history has previously been addressed with both geochemical and phylogenetics-based approaches. Geochemical approaches, relying on the reconstruction of metabolisms based on the rock record, have suggested that biological nitrogen fixation emerged early (Stüeken *et al.*, 2016a; Koehler *et al.*, 2019; Ossa Ossa *et al.*, 2019) and that the nitrogen cycle expanded considerably during the Neoproterozoic (2.8-2.5 Ga) and Paleoproterozoic (2.5-1.8 Ga) (Garvin *et al.*, 2009a; Godfrey & Falkowski, 2009; Zerkle *et al.*, 2017a; Kipp *et al.*, 2018; Koehler *et al.*, 2018; Luo *et al.*, 2018). Phylogenetics studies, relying on sequence data, reconstruct the evolutionary history of genes of

interest (e.g. Jones *et al.*, 2008; Boyd *et al.*, 2011b; Garcia *et al.*, 2020), and some molecular clock studies have yielded conservative estimates for the approximate timing of an enzyme's origin (Raymond *et al.*, 2004; Boyd *et al.*, 2011b; Boyd & Peters, 2013). While each approach provides valuable insights, they both have weaknesses. Geochemical data cannot reliably distinguish between all enzymatic pathways, because the isotopic effects of some reactions (e.g., denitrification, DNRA and ANAMMOX) are too similar to each other. Furthermore, geochemical data, which are typically collected from bulk rock samples, only preserve evidence of the most dominant metabolisms and may therefore not capture the origin of new enzymes until they gain ecological significance. Conversely, the phylogenetic approach of dating the antiquity of enzymes does not show when these enzymes gained ecological dominance. Furthermore, most phylogenetic studies have so far focused on nitrogenase, leaving the evolutionary history of most nitrogen-cycling enzymes poorly constrained. Additional work is therefore needed to address key questions about the dynamics of the nitrogen cycle on the early Earth and its evolution over time. The proliferation of sequencing data over the past decade has made vast amounts of genomic data available, which can provide novel insights into the evolution of nitrogen cycling genes over time.

As a new approach to these questions, we track the timing of birth, speciation, duplication, loss, and horizontal gene transfer events for genes involved in each step of the nitrogen cycle, which can provide contextual information for the rise and spread of key nitrogen-cycling genes across the tree of life. We place particular focus on the acquisition of new genes via horizontal gene transfer (HGT), which is common in microbial lineages and is a crucial evolutionary mechanism by which a clade of organisms can develop new and useful phenotypes without the evolutionary cost associated with independently evolving genes (Beiko *et al.*, 2005; Gogarten & Townsend, 2005). Studies of gene gain and loss have revealed a history of widespread HGT throughout the microbial tree of life, which we have attempted to leverage as a means to attribute trends in microbial evolution to events in Earth history (Koonin *et al.*, 2001; Mirkin *et al.*, 2003). Many of the major genes in the nitrogen cycle have been shown to have experienced extensive HGT, presumably due to their modularity and their strong dependence on oxygen availability (Stolz & Basu, 2002; Kechris *et al.*, 2006; Jones *et al.*, 2008). We tracked birth, speciation, duplication, loss, and HGT of genes in the nitrogen cycle over time by comparing the phylogenies for specific nitrogen-metabolizing genes to a time-calibrated tree of

life to demonstrate when these genes first arose and then spread across the tree of life on the early Earth.

## Materials and Methods

### *Genome Selection and Compilation*

The construction of both the gene and species trees for this study was based upon the manual curation of a genome database containing 308 genomes (including 254 bacterial and archaeal genomes) that served as the basis for the species tree and was subsequently searched to find genes related to nitrogen metabolism. Assembled genomes were downloaded from ggKBase (Hug *et al.*, 2016) and the NCBI assembly database (Kitts *et al.*, 2016). Additionally, 6 genomes were collected from a recent study identifying novel nitrogen fixers (Delmont *et al.*, 2018). In constructing the tree, we included at least one genome from each bacterial or archaeal phylum represented in the most recent comprehensive tree of life (Hug *et al.*, 2016) in order to create a tree fully representative of our current understanding of microbial diversity. It also includes a set of genomes associated with a database of *nifH* genes (Gaby & Buckley, 2014). Some eukaryotic genes were included for construction of the tree, but for this study we focused only on archaeal and bacterial genomes for identification of nitrogen cycling genes. Relative to archaea and bacteria, eukaryotes play a more minor role in the nitrogen cycle—while some species of fungi and protists reduce nitrate or nitrite to more reduced forms of nitrogen, there are no known eukaryotes that mediate nitrogen fixation, nitrification, DNRA, or anammox (Stein & Klotz, 2016).

### *Species tree and chronogram construction*

To create the species tree, all bacterial and archaeal genomes in our database were mined for single copy ribosomal protein sequences L2, L3, L4, L5, L6, L14, L15, L16, L18, L22, L24, S3, S8, S10, S17, and S19 using Phylosift (Darling *et al.*, 2014), with the isolate and best hit command line flags. These sixteen ribosomal proteins represent the same proteins used to create a recent comprehensive tree of life (Hug *et al.*, 2016) and, in the case of eukaryotes, ribosomal sequences were directly drawn from their dataset. All genomes included in the dataset contained fewer than 50% gaps in the alignment. These 16 single-copy ribosomal proteins were

concatenated to create a final alignment of 2897 characters for phylogenetic reconstruction and molecular clock evaluation.

Alignments for the species trees were made using the Phylosift pipeline (Darling *et al.*, 2014) and curated to only include the target ribosomal proteins listed above. The phylogeny was constructed using RAxML v.8.2.9 with 100 rapid bootstraps (Stamatakis, 2014). The CAT model, which calculates site-specific evolutionary rates, was used with an LG substitution matrix to construct the species tree based on reference marker genes (the species tree). The root for the species tree was placed in the Bacterial domain (Fournier & Gogarten, 2010).

### *Chronogram Construction*

The species tree was converted into chronograms using PhyloBayes (Lartillot *et al.*, 2009) using different clock models and calibration points in order to test the sensitivity of our results to variation in Phylobayes parameters. The root age was set via a normally distributed gamma root prior according to the liberal or conservative calibration points set in Table 1 and Supplementary Table 1, with standard deviation set to 200 in accordance with previous studies (Magnabosco *et al.*, 2018). We tested two separate sets of calibration points, one liberal (which represents the earliest date for which there is any evidence of a given event based on the current scientific literature) and one conservative (which represents the earliest date for which there is the most consensus for a given event based on the current scientific literature), to test the sensitivity of methodology (Table 1 and Supplementary Table 1). For each set of internal calibration points, the ages in the calibration files were set as the hard lower bound for the analysis. The liberal calibration points shown in Supplementary Table 1 yielded unrealistic root ages (>4.5 Ga) and therefore were not used for further analyses.

We created chronograms using both the uncorrelated gamma (UGAM) model (Drummond *et al.*, 2006) and the autocorrelated CIR relaxed clock model (Lepage *et al.*, 2007) to compare the effects of clock model type on the results. Two chains were run in parallel for each set of parameters, so that the two concurrent runs could be compared to one another as a test of convergence. Convergence of the MCMC chains was checked visually by plotting the summary statistics, and quantitatively by comparing the posterior distributions of two parallel chains using the *tracecomp* and *bpcomp* programs in PhyloBayes. We required an effective size >100 and a maximum difference between chains of <0.3. Simultaneous chains were run for

approximately 36,000 cycles. Chronograms were generated using the *readdiv* function in Phylobayes 4.1, with approximately 20% of initial cycles discarded as burn-in. Chronograms were visualized using the phytools package in R (Revell, 2012). In order to test for the influence of the priors, we generated additional chronograms in the absence of sequence data using the -prior flag in Phylobayes. These chronograms displayed substantially different node timings, demonstrating that the priors did not overly influence the inferred dates and the sequence data informed the chronogram. Results from molecular clock analyses should be interpreted with caution, given the limitations associated with these analyses, including but not limited to changing generation times, the influence of natural selection, and variation in mutational rates across species (Ayala, 1999; Schwartz & Maresca, 2006; Bromham *et al.*, 2018). Here, we attempted to ameliorate some of these challenges by using methods allowing for variation of rates between and across lineages, and by comparing results produced by different clock models. Finally, our goal with this analysis was not to pinpoint exact dates for many of the transitions discussed here, but rather to compare the relative timing on broad evolutionary scales.

### *Identification of nitrogen-cycling genes and construction of gene trees*

Curated gene database queries for each of the nitrogen-cycling genes we investigated were generated based on KEGG orthologies (Ogata *et al.*, 1999) and downloaded from the UniProt database (The Uniprot Consortium, 2017). Nitrogen-cycling amino acid sequences for the gene trees were identified by conducting BLASTP (Altschul *et al.*, 1990) searches of the open reading frames (ORFs) of every genome from the collection of 254 genomes. All ORFs were identified using Prodigal (Hyatt *et al.*, 2010). The maximum e-value cutoff for BLAST hits was  $10^{-12}$  and matches were excluded if the length of the local alignment was less than 50% of the length of the query sequence. BLAST results were compared with results from AnnoTree (Mendler *et al.*, 2019) to verify gene distributions. Given that *nifK* and *nifD* have a shared evolutionary history (Fani *et al.*, 2000), an e-value cutoff of  $1e-30$  was selected based on close examination of blastp hit results and KEGG annotations, which was sufficient to distinguish these subunits. For nitrogenase subunits *nifH*, *vnfD*, *vnfK*, *anfD*, and *anfK* we manually curated alignments by identifying key residues that were crucial for enzyme structure and function, as determined through literature searches and visualization using PyMol (Brigle *et al.*, 1987; Kaiser *et al.*, 2011; McGlynn *et al.*, 2012; Howard *et al.*, 2013; Keable *et al.*, 2018). Jalview

(Waterhouse *et al.*, 2009) was used for visualization of key residues in alignments. All genes that did not include the key residues were removed from the alignment. Finally, to ensure that only the genes of interest were included in alignments and to verify annotations, all genes identified in the BLAST search were compared to the KEGG database using Kofam Koala (Aramaki *et al.*, 2019), which assigns KEGG Ortholog numbers to each gene by using a homology search against a database of profile hidden Markov models. Only genes verified to be the gene of interest according to Kofam Koala were retained for downstream analysis. It is important to note that gene identification is necessarily limited by the search tools and databases used for annotation, and the methods used here were chosen to be conservative so as to ensure the removal of non-target genes from the analysis.

Alignments for the gene trees were created using MUSCLE (Edgar, 2004) and trimmed with TrimAl (Capella-Gutierrez *et al.*, 2009) using the -automated1 option. The model of evolution was selected using Model Selection as implemented in IQTREE (Kalyaanamoorthy *et al.*, 2017) using the default parameters. Trees were generated with RAxML-NG (Kozlov *et al.*, 2019) using the model of evolution identified in IQ-TREE. Trees were run with at least 1000 bootstraps or until the diagnostic statistic based on the MRE-based bootstrapping test as implemented in RAxML-NG dropped below a cutoff of 0.03.

### *Gene Tree and Species Chronogram Reconciliation*

Gene trees were reconciled with species chronograms using the Analyzer of Gene and Species Trees (AnGST) (David & Alm, 2011). AnGST compares the topology of the gene tree with that of the species tree, rather than rely solely on presence and absence patterns, in order to identify gene birth, transfer, duplication, and loss events. Event penalties were set to hgt: 3, dup: 2, los: 1, and spc: 0. Ultrametric was set to True in order to constrain events temporally. Each run was conducted with 100 gene tree bootstraps in order to increase accuracy (David & Alm, 2011). Individual event timings were defined as the midpoint of the temporal region during which a given event could occur.

## **Results**

### *Generation of a species tree and fossil-calibrated chronogram*

We compared all gene trees to a species tree constructed from an alignment of concatenated sequences of 16 single-copy universal proteins from 308 organisms (Figure 2; genome list available as Supplemental Data). Monophyly was preserved for most major phyla, with three exceptions: (i) Tenericutes is contained within Firmicutes, (ii) the PVC superphylum contains Omnitrophica, and (iii) Lentisphaerae is nested within Verrucomicrobia. Additionally, in contrast to a recently published comprehensive tree of life (Hug *et al.*, 2016), our tree does not place the recently-discovered Candidate Phyla Radiation (CPR) bacteria as the deepest-rooted bacterial clade; however, the CPR is placed as a sister group to the Cyanobacteria and Melainabacteria, which is consistent with that phylogeny (Hug *et al.*, 2016). For the purposes of this study, placement of these groups should not greatly affect our results due to the high number of duplication/loss/transfer events we inferred overall across all groups. The species tree used for this analysis is a three-domain tree, in contrast to recent studies which have shown the addition of the Asgard Archaea to the tree of life to cause Eukaryotes to group within Archaea (Zaremba-Niedzwiedzka *et al.*, 2017). However, we are agnostic as to the placement of the Asgard superphylum and the eukaryotes on the tree of life, as this was not our focus; the relationship of the three domains to one another should not substantially affect the results shown here due to the relative infrequency of inter-domain HGT relative to interdomain HGT, and the exclusion of eukaryotic nitrogen-cycling genes.

We constructed four different chronograms from our species tree using two different clock models (UGAM and CIR) as well as liberal (representing the earliest date for which there is any evidence of a given event based on the current scientific literature) and conservative (representing the earliest date for which there is the most consensus for a given event based on the current scientific literature) fossil calibration points (see Methods). The liberal calibration points yielded an unreasonable root age (>4.5 Ga) and so were not further used for analysis. The UGAM clock model yielded a greater spread in estimated ages for node divergences, with an earlier root age (approximately 4044.68 +/- 143.093 Mya compared to 3982 +/- 131.218 Mya for the CIR clock model). The results shown in Figure 3 and Table 4 derive from the CIR clock model as this has been previously shown to outperform uncorrelated models (Lepage *et al.*, 2007), but the results from the UGAM clock model are shown in Supplementary Figure 3 and Supplementary Table 2. All genome lists, alignments, and Newick files have been deposited in FigShare at:

[https://figshare.com/projects/Radiation\\_of\\_nitrogen\\_cycling\\_genes\\_across\\_the\\_tree\\_of\\_life/87461](https://figshare.com/projects/Radiation_of_nitrogen_cycling_genes_across_the_tree_of_life/87461)

# *Identification of duplication, speciation, loss, and horizontal gene transfer events for nitrogen-cycling genes*

We identified 18 different nitrogen-cycling genes for analysis of horizontal gene transfer, speciation, duplication, and loss events (Table 2). This methodology is best suited to genes that have many representatives from a diverse suite of taxa. Very few genes from the *hao* and *amo* gene families were identified in these genomes or passed our stringent filtration tests, and thus they did not yield sufficient data for robust conclusions and were not included in further analyses. We generated maximum likelihood gene trees for each of the remaining genes (Supplementary Data) and compared these gene trees to the fossil-calibrated chronogram in order to identify and infer the timing of birth, duplication, loss, and horizontal gene transfer events for each of these genes. The number of speciation events inferred for each gene in this study was relatively high compared to the number of inferred loss and HGT events (Table 3), with very few duplication events observed. Inferred loss events generally skewed younger than inferred horizontal gene transfer and speciation events. Our results indicate that the iron-molybdenum nitrogenases (*nifH/nifD/nifK*) were among the oldest genes, originating during the Archean era and beginning to spread across the tree of life via horizontal gene transfer fairly early in Earth history (Fig. 3). In contrast, the alternative nitrogenases *anf* and *vnf* were inferred to have arisen and radiated across the tree of life much later (Table 4, Supplementary Table 2, Supplementary Figures 4 and 5), but very few *anf* and *vnf* genes were identified among our sample set and therefore these results should be treated with caution (Table 2). The denitrifying genes *norB*, *nosZ*, *nirK* and *nirS* were inferred to have arisen later in Earth history (Table 4) and began to proliferate across the tree of life much more recently, up to approximately 1.5 Ga (Figure 3). These genes encode enzymes that catalyze denitrification processes from nitrite to nitric oxide, nitrous oxide, and dinitrogen gas. The genes *nrfA* and *nirB*, which are involved in the DNRA process, are inferred to have arisen by approximately 2.7-2.2 Ga, and began to increasingly proliferate widely across the tree of life into the Mesoproterozoic. Genes involved in nitrate reduction, including *narG*, *nasA*, and *napA*, were inferred to have arisen relatively early (approximately 2.8 Ga for *narG* and *napA*; approximately 2.3 Ga for *nasA*) (Table 4) and we

inferred a few speciation and horizontal gene transfer events for these genes between 2-2.5 Ga, but we did not observe a rise in HGT events for these genes until much later, at approximately 1.5 Ga (Figure 3). We observed a similar trend for *nxrA*, a gene involved in nitrite oxidation, which was inferred to have arisen around 2.8 Ga but did not exhibit a rise in speciation, duplication, or transfer events until approximately 1.5 Ga (Figure 3, Table 4).

Taken together, we observed that genes related to the fixation of nitrogen from dinitrogen gas to ammonium arose early and proliferated across the tree of life relatively quickly, while genes related to nitrate reduction and nitrite oxidation also arose early but did not begin to proliferate across the tree of life until later. Genes related to denitrification, particularly downstream from nitrite, arose much later (Figure 3). Our results regarding the timing of the birth, duplication, speciation, loss and HGT events for specific nitrogen-cycling genes showed a few differences between the CIR (Figure 3, Table 4) and UGAM clock models (Supplementary Figure 3, Supplementary Table 2). However, the overall patterns in the relative timing for the birth and spread of specific genes in the nitrogen cycle were similar regardless of the type of clock models used.

## Discussion

We have focused here on tracking gene birth, duplication, speciation, and particularly horizontal gene transfer events across deep time. The acquisition of new functional genes is particularly important because it can allow clades of microbes to invade new ecological niches. The rate of horizontal gene transfer itself is likely to be related to variables like cell density, co-localization of donor and recipient, cell diversity, and the types of organisms involved (Gogarten & Townsend, 2005). Although some have argued for a neutral theory of gene transfer in which horizontally acquired genes are not adaptive (Gogarten & Townsend, 2005; Andreani *et al.*, 2017), studies indicating that horizontally transferred genes perform crucial cellular functions and enable adaptation to specific ecological niches suggest that horizontally acquired genes are generally adaptive (Daubin & Ochman, 2004; Coleman & Chisholm, 2010; Burke *et al.*, 2011; Popa *et al.*, 2011; Polz *et al.*, 2013; McInerney *et al.*, 2017; Moulana *et al.*, 2020). Moreover, genes providing selective advantages are more likely to be retained in the genome than genes acquired due to neutral transfer, which are more likely to be purged, thus strengthening the signal of adaptive HGT events in the genomic record. Therefore, any observations of a rise in the

relative number of successful horizontal gene transfers for a given gene are likely to give an indication of the relative availability or metabolic importance of a given substrate for that gene. As such, studying the history of HGT of specific genes can provide insights into the points at which possession of such genes provided substantial selective advantages, which can then be used as a metric for when a specific metabolism became feasible or energetically favorable, or when the substrates of specific enzymes became relatively abundant. A crucial caveat to this method, however, is that it cannot infer relative abundance or population sizes of the organisms carrying these genes. Thus, if a specific strain carrying a nitrogen metabolizing gene grows in abundance with no transfer of genes to other lineages, our method would observe low rates of transfer for genes involved in that metabolism. Additionally, a poor phylogeny caused by weak phylogenetic signal within the alignment would make it difficult to precisely identify such horizontal gene transfer events. Therefore, these results, while easily overinterpreted, should largely be interpreted in the context of other studies, especially those which use substantially different methodologies.

On the whole, our results provide support for geochemical data indicating that biological nitrogen fixation was an important source of fixed nitrogen in the Archaean (Stüeken *et al.*, 2015; Ossa Ossa *et al.*, 2019). These results also suggest that local sources of nitrate may have been exploited by denitrifying microbes, while denitrifiers using nitrite or downstream products would not have proliferated until much later in Earth history, until the mid-Proterozoic, well after the Great Oxidation Event. This finding is consistent with previous geochemical studies that documented isotopic evidence of denitrification in the Neoarchean (Garvin *et al.*, 2009b; Godfrey & Falkowski, 2009; Koehler *et al.*, 2019) and Paleoproterozoic (Zerkle *et al.*, 2017a; Kipp *et al.*, 2018; Luo *et al.*, 2018). Our results suggest that genes involved in nitrate reduction arose by approximately 2.8 Ga, indicating that nitrate was present and used as a metabolic substrate at that time. However, our data suggest that denitrification may not have been a reliable energy source until about 1.5 Ga, and therefore used by a smaller diversity of clades. From the mid-Proterozoic onwards, nitrate may have been sufficiently bioavailable to make it a more widely-used substrate. In the following, we discuss the implications of our results for the evolution of the nitrogen cycle and its relationship to the redox state of the Earth.

## Nitrogen Fixation

Our data indicate that nitrogen fixation through the use of molybdenum nitrogenase (Nif) is an ancient process, arising by approximately 3.1-2.7 Ga (Table 4). Our results are consistent with previous work from geochemical analyses suggesting that nitrogen fixation must have arisen early in order to support an expanding biosphere (Stüeken *et al.*, 2016a; Koehler *et al.*, 2019; Ossa Ossa *et al.*, 2019). In contrast, a previous analysis based on the evolutionary rate of nitrogenase genes suggested that functional Mo-nitrogenase arose relatively late (approx. 2.2-1.5 Ga) (Boyd *et al.*, 2011a), which may also be consistent with the hypothesis that modern planktonic nitrogen fixers did not become abundant in global oceans until the Neoproterozoic (Sánchez-Baracaldo *et al.*, 2014). Our results, which are based on reconciliation of gene trees with a chronogram inferred from universally conserved, single-copy genes, are instead consistent with recent nitrogen isotope evidence for biological nitrogen fixation back to at least 3.2 Ga (Stüeken *et al.*, 2015). It is also consistent with phylogenetics work suggesting that molybdenum nitrogenase arose early in the evolution of life on Earth (Raymond *et al.*, 2004). Similarly, phylogenetic reconstructions showing that Mo-nitrogenases arose before V- and Fe-nitrogenases are consistent with this conclusion (Garcia *et al.*, 2020). It has been argued that nitrogenase was present in LUCA (Weiss *et al.*, 2016), though that has been disputed (Boyd *et al.*, 2011a; Mus *et al.*, 2019; Berkemer & McGlynn, 2020) and our results do not resolve this issue. However, the identification of horizontal gene transfer events for nitrogenase subunits during the Archean (Figure 3) suggest that this metabolism may have been abundant and beneficial enough during this time period to have been successfully transferred and retained in microbial genomes.

Our results support the argument that abiotic sources of fixed nitrogen were unlikely to be significant enough to sustain the early biosphere (Raymond *et al.*, 2004; Canfield *et al.*, 2010). It has been proposed that early life received its nitrogen from the lightning-catalyzed reaction between N<sub>2</sub> and CO<sub>2</sub> as a source of NO<sub>x</sub>, and that a steady reduction in atmospheric CO<sub>2</sub> levels reduced this flux, eventually leading to a nitrogen crisis around 2.2 Ga that would have favored the rise and spread of biological nitrogen fixation (Navarro-González *et al.*, 2001). In contrast, several studies have concluded that abiotic nitrogen fixation on the early Earth would produce 50- to 5000-fold lower rates of fixed nitrogen than what is contained in the modern ocean, making nitrogen highly limiting to the early biosphere, even at higher CO<sub>2</sub> levels (Canfield *et al.*, 2010). Our data suggest that biological nitrogen fixation arose and proliferated early and that acquisition of the nitrogenase enzyme provided enough of a selective advantage to

be successfully transferred across lineages during the early Archean, supporting the notion that fixed nitrogen was not widely available.

Moreover, if the radiation of biological N<sub>2</sub> uptake dates back to the early Archean, it may have had a significant impact on atmospheric pressure. Today, nitrogen makes up approximately 78% of the Earth's modern atmosphere by volume, predominantly as N<sub>2</sub> gas. The atmosphere of the early Earth was probably also N<sub>2</sub>-rich, but while some models suggest a 2-4 times larger atmospheric N<sub>2</sub> reservoir in the Archean (Johnson & Goldblatt, 2018), proxy evidence ranges from near modern values (Marty *et al.*, 2013; Avice *et al.*, 2018) to less than half of today's reservoir (Som *et al.*, 2016). If atmospheric N<sub>2</sub> pressure changed over time, it is likely that biological activity would have played a major role in driving these changes by enhancing nitrogen burial in sediments and by accelerating oxidative weathering of nitrogen from continental crust (Stüeken *et al.*, 2016b; Zerkle & Mikhail, 2017). If nitrogen was fixed by nitrogenase early in the Archean, as indicated by our results, then biological nitrogen burial began long before the onset of oxidative weathering in the Neoproterozoic (Stüeken *et al.*, 2012) which makes it possible that atmospheric N<sub>2</sub> decreased over the course of the Archean. Although further paleobarometric proxies are needed to verify this trend, our results provide an important anchor point for the onset of biological N<sub>2</sub> drawdown.

Lastly, though we identified very few iron and vanadium nitrogenases (*anf* and *vnf*, respectively) in our datasets, our results tentatively suggest that these nitrogenases radiated across the tree of life later than the iron-molybdenum nitrogenases (*nif*), which supports conclusions from other phylogenetics studies (Garcia *et al.*, 2020). The early rise of Mo-dependent nitrogenase would have required a source of Mo to act as a cofactor for Mo-containing nitrogenases, implying that nanomolar levels of dissolved Mo (Scott *et al.*, 2008; Reinhard *et al.*, 2013), presumably derived from anoxic weathering or hydrothermal sources of molybdenum to the early ocean, were sufficient for the development of Nif and the proliferation of nitrogen fixers. Oxidative weathering was therefore evidently not required for the onset of biological nitrogen fixation (c.f. Boyd *et al.*, 2011b). We speculate that the evolutionary pressure for the diversification of alternative nitrogenases arose in the Neoproterozoic with the rise of eukaryotic algae (Brocks *et al.*, 2017), which may have substantially increased the nitrogen demand in the global ocean. Vanadium and iron-based nitrogenases are less efficient at fixing nitrogen than Nif (Mus *et al.*, 2018), which perhaps lowers the probability of successful gene

transfer for Vnf and Anf. However, when nitrogen-demand increased in the environment, it is conceivable that more of these genes were shared successfully. Another hypothesis to explain our data is that the gene transfer of alternative nitrogenases was affected by global climate. Vnf becomes more efficient than Nif at cold temperatures (Miller & Eady, 1988) and the activity of Nif-using cyanobacteria decreases at high latitudes (Brauer *et al.*, 2013). Thus, the cold climate of the Cryogenian 'Snowball Earth' period (720-635 Ma) (Hoffman *et al.*, 2017) may have increased the fitness of organisms possessing Vnf. However, these hypotheses remain speculative until more genomic data for Vnf and Anf has been acquired. In any case, it is important to keep in mind that the origin of alternative nitrogenases likely occurred long before the Neoproterozoic. Vanadium nitrogenase in *Azotobacter vinelandii* has been shown to reduce carbon monoxide (CO) to the hydrocarbons ethylene (C<sub>2</sub>H<sub>2</sub>), ethane (C<sub>2</sub>H<sub>6</sub>), and propane (C<sub>3</sub>H<sub>8</sub>) (Lee *et al.*, 2010), which supports the origin of V-nitrogenase in the Archean eon when CO was more abundant in the atmosphere (Anbar & Knoll, 2002). Additionally, V was bioavailable in Archean ocean waters under slightly acidic conditions (Moore *et al.*, 2020). The genomes of more V-nitrogenase and Fe-nitrogenase organisms must be sequenced to better understand the evolutionary history of these alternative nitrogenases.

#### *Nitrogen Cycling Prior to the Oxygenation of the Oceans and Atmosphere*

Although our results suggest that nitrogen fixation was an important process on the early Earth, microbial metabolisms making use of more oxidized forms of nitrogen, particularly through the process of denitrification downstream from nitrite, do not appear to have arisen and spread across the tree of life until much later. Some early steps in the nitrogen cycle, such as nitrate reduction to nitrite via *nasA*, *narG* or *napA*, appear to have arisen relatively early (in the late Archean or early Proterozoic), consistent with geochemical record of denitrification at that time (Godfrey & Falkowski, 2009; Koehler *et al.*, 2019). However, we did not identify many horizontal gene transfer events early in the evolutionary history of these genes, and their proliferation across the tree of life only began in earnest much later, approximately 1.5 Ga. Our results therefore suggest that nitrate availability was restricted in space and/or time. Indeed, thermodynamic constraints and environmentally resolved geochemical datasets show that the anoxic deep ocean of the Precambrian contained ammonium while nitrate was restricted to surface waters (Stüeken *et al.*, 2016a; Yang *et al.*, 2019). It is therefore likely that the nitrate-

reducing genes appeared in locally oxygenated regions of the Archean surface ocean, which have been inferred from isotopic studies back to 3.0 Ga (Olson *et al.*, 2013; Planavsky *et al.*, 2014). In such oxygen oases, oxygen concentrations may have reached micromolar concentrations (Olson *et al.*, 2013), which is high enough for the complete oxidation of ammonium to nitrite and nitrate (Lipschultz *et al.*, 1990). Alternatively, it a small flux of nitrogen oxides from lightning and volcanism may have existed (Navarro-González *et al.*, 2001; Mather *et al.*, 2004) and maintained populations of nitrate-reducing denitrifiers. Denitrification is a highly energy-yielding metabolism (Schoepp-Cothenet *et al.*, 2013), and therefore even a small source flux of nitrate to the early ocean would probably have been exploited. However, we stress that denitrification left its geochemical mark in only a few Archean basins (Garvin *et al.*, 2009b; Godfrey & Falkowski, 2009; Koehler *et al.*, 2019), while other localities show no geochemical evidence of nitrate reduction (Ossa Ossa *et al.*, 2019). This observation may argue against a significant contribution of lightning-derived nitrogen oxides, which we would expect to have been more uniformly distributed.

Our results suggest that genes for nitrite-metabolizing enzymes were not frequently transferred during the early Archean, which may imply that nitrite-metabolizing genes were not widespread in Archean ecosystems. It is possible that only specific taxa were responsible for the conversion of nitrite into nitrate or ammonium. Alternatively, the conversion of nitrite to ammonium may have happened abiotically. Ferrous iron ( $\text{Fe}^{2+}$ ), which is thought to have been abundant in the early anoxic ocean, may have readily reduced nitrite to ammonium or nitrogen gas without biological intervention (Summers & Chang, 1993; Canfield *et al.*, 2010). Nitrite levels during this time period were therefore likely too low to cause substantial proliferation of genes for enzymes which take nitrite as a substrate, while nitrate and ammonium concentration were high enough for selection to favor biological metabolism of these molecules by diverse microorganisms.

### *Effects of Increased Oxygen Levels on the Nitrogen Cycle*

Multiple lines of evidence point to increasing oxygenation of surface environments from 2.75 Ga onwards, culminating in the Great Oxidation Event (GOE) at 2.3 Ga (Noffke *et al.*, 2007; Crowe *et al.*, 2013; Lyons *et al.*, 2014; Planavsky *et al.*, 2014). Our data suggest that the genes *nrfA* and *nirB*, which reduce a variety of oxidized forms of nitrogen to ammonium through

the DNRA pathway, arose in the Neoproterozoic or Paleoproterozoic, but the relative number of HGT events for this gene began to rise approximately around the time of the GOE. Unlike denitrification to  $N_2$  gas, DNRA retains the reduced nitrogen product in the system as aqueous  $NH_4^+$ , which may have prevented a potential ‘nitrogen crisis’ during the wake of the GOE (Falkowski & Godfrey, 2008). The isotopic fingerprint of DNRA can so far not be distinguished from denitrification in the geochemical record, and thus our results provide the first indication that this metabolism may have been of greater ecological importance than previously proposed. DNRA rather than denitrification may therefore explain geochemical evidence of biological nitrate reduction in the Neoproterozoic and early Proterozoic (Garvin *et al.*, 2009b; Godfrey & Falkowski, 2009; Zerkle *et al.*, 2017b; Kipp *et al.*, 2018), i.e. long before our observed radiation in denitrification genes. This observation may suggest that these early nitrate-reducing ecosystems were primarily performing DNRA, consistent with iron-rich conditions in the Archean and Paleoproterozoic ocean (Michiels *et al.*, 2017).

After approximately 1.5 Ga, the relative number of HGT events for enzymes involved in the modern denitrification pathway began to rise. Additionally, our data suggest that the gene *nxr*, which oxidizes nitrite into nitrate, arose relatively early (approx. 2.8 Ga) but did not begin to spread across the tree of life until ~1.5 Ga. One possibility is that increased copper availability facilitated the spread of nitrification/denitrification, which require enzymes that rely on copper cofactors (Moore *et al.*, 2017). However, geochemical evidence of increasing copper concentrations in seawater at 1.5 Ga is so far lacking. Another possibility is that the expansion of these metabolisms is linked to a Mesoproterozoic rise in oxygen, which has recently been proposed in several geochemical studies (Cox *et al.*, 2016; Canfield *et al.*, 2018; Zhang *et al.*, 2018; Shang *et al.*, 2019). Higher oxygen levels would have led to an expansion of the marine nitrate reservoir, which may in turn have been critical for the rise of eukaryotes around this time (Anbar & Knoll, 2002; Knoll & Nowak, 2017).

The primary substrate for many of the enzymes that demonstrated this late rise in the number of HGT events is nitrite, suggesting that nitrite levels may have increased at this time, such that selection favored the spread of nitrite-metabolizing enzymes across the tree of life. Nitrite is thermodynamically unstable in oxic conditions, but it occurs transiently in chemoclines in the modern ocean because it is abundantly produced as an intermediate in nitrification and denitrification pathways (Wada & Hatton, 1971). A more vigorous aerobic nitrogen cycle in the

Proterozoic may thus be linked to the establishment of a more permanent dynamic nitrite reservoir. Abiotic reduction of nitrite by  $\text{Fe}^{2+}$ , which was perhaps dominant during the Archean (see above), may have slowed down with the deepening of the chemocline after the GOE.

Several caveats must be kept in mind while interpreting these results. As mentioned above, the accuracy of molecular clocks is constrained by the models used to infer dates and the accuracy of the fossil-based time points used for clock calibration. We sought to minimize the influence of these parameters by using both liberal and conservative time points and by employing two different clock models, but nevertheless these limitations must be taken into consideration, and thus we emphasize the relative rather than the absolute timing of the events identified here. Importantly, the results generated through the use of liberal calibration points are not intended to be taken as an older bound for these gene proliferations, but rather as a test of the sensitivity of our results to the specifications of the molecular clock. Moreover, the methods used to identify genes used in the analysis were designed to be conservative so as to reduce the possibility that spurious genes were included in the analysis, but these methods are inherently limited by the quality of the databases used for annotation. These conservative methods precluded the inclusion of *hao* and *amo*, which are involved in the oxidation of ammonia to nitrite and nitrogen gas, in our analysis. Others have observed that archaeal ammonia oxidizers most likely originated during the GOE and began to spread through the shallow ocean approximately 800 Mya (Ren *et al.*, 2019). As new genes and genomes continue to be sequenced and analyzed for gene function, the quality of such analyses will improve over time.

## Conclusion

Our results show that biological nitrogen fixation appears to have arisen and proliferated early in the Archean, and that genes in the denitrification pathway and genes related to the consumption of nitrite and its downstream products began to proliferate across the tree of life following the oxygenation of Earth's atmosphere and oceans. Moreover, our results support the hypothesis that the molybdenum-based variety of nitrogenase diversified much earlier than alternative nitrogenases, which may only have become important with the increasing nitrogen demand of algae in the Neoproterozoic, implying that molybdenum was not a limiting resource in the Archean ocean. Furthermore, our data provide the first indirect evidence for a small source of nitrate to the early ocean, possibly as a result of lightning and volcanism or from localized

oxygen oases. Some of this nitrate appears to have been used for nitrate reduction to ammonium (DNRA), which may have helped overcome nitrogen limitation by retaining fixed nitrogen in the system. DNRA rather than denitrification may explain some of the isotopic records of biological nitrate utilization in the Archean and early Proterozoic. We cannot confirm the hypothesized suppression of  $N_2O$ -metabolizing enzymes in the mid-Proterozoic, but our results are consistent with vigorous nitrification and denitrification after the GOE, in particular from 1.5 Ga onwards, which may have led to leakage of  $N_2O$  into the atmosphere and the stabilization of global climate. The proliferation of key nitrogen-metabolizing genes across the tree of life at different points in Earth's redox history provides important insights into the evolution and radiation of microbial metabolisms on the early Earth in response to major environmental transitions and supports the notion that increasing nitrate levels in the mid-Proterozoic may have contributed to the rise of eukaryotic life.

## Acknowledgements

We thank three anonymous reviewers for extremely detailed and helpful comments that greatly improved the manuscript. We would like to thank Rou-Jia Sung for assistance with structural predictions, as well as Casey Bryce, Colin Goldblatt, Ben Johnson, John Baross, Victoria Meadows, Jaclyn Saunders, and Cara Magnabosco for support and useful discussions. This work was performed as part of NASA's Virtual Planetary Laboratory, supported by the NASA Astrobiology Program under grant 80NSSC18K0829 as part of the Nexus for Exoplanet System Science (NExSS) research coordination network. CWP received a Towsley Fellowship from Carleton College, CR was supported by the Virtual Planetary Laboratory, KM was supported by a Student Research Partnership grant from Carleton College, and REA was supported in part by a NASA Postdoctoral Fellowship from the NASA Astrobiology Institute.

## References

- Altschul SF, Gish W, Miller W, Myers EW, Lipman DJ (1990) Basic local alignment search tool. *Journal of Molecular Biology* **215**, 403–410.
- Anbar AD, Knoll AH (2002) Proterozoic ocean chemistry and evolution: A bioinorganic bridge? *Science* **297**, 1137–1142.
- Andreani NA, Hesse E, Vos M (2017) Prokaryote genome fluidity is dependent on effective population size. *The ISME Journal* **11**, 1719–1721.
- Aramaki T, Blanc-Mathieu R, Endo H, Ohkubo K, Kanehisa M, Goto S, Ogata H (2019) KofamKOALA: KEGG ortholog assignment based on profile HMM and adaptive score threshold. *Bioinformatics*.
- Avice G, Marty B, Burgess R, Hofmann A, Philippot P, Zahnle K, Zakharov D (2018) Evolution of atmospheric xenon and other noble gases inferred from Archean to Paleoproterozoic rocks. *Geochimica et Cosmochimica Acta* **232**, 82–100.
- Ayala FJ (1999) Molecular clock mirages. *BioEssays* **21**, 71–75.
- Beiko RG, Harlow TJ, Ragan MA (2005) Highways of gene sharing in prokaryotes. *Proceedings of the National Academy of Sciences of the United States of America* **102**, 14332–7.
- Bekker A, Holland HD, Wang P-L, Rumble D, Stein HJ, Hannah JL, Coetzee LL, Beukes NJ (2004) Dating the rise of atmospheric oxygen. *Nature* **427**, 117–120.
- Berkemer SJ, McGlynn SE (2020) A New Analysis of Archaea–Bacteria Domain Separation: Variable Phylogenetic Distance and the Tempo of Early Evolution. *Molecular Biology and Evolution*.
- Boyd ES, Anbar AD, Miller S, Hamilton TL, Lavin M, Peters JW (2011a) A late methanogen

610 origin for molybdenum-dependent nitrogenase. *Geobiology* **9**, 221–32.

611 Boyd ES, Hamilton TL, Peters JW (2011b) An alternative path for the evolution of biological  
612 nitrogen fixation. *Frontiers in Microbiology* **2**, 1–11.

613 Boyd ES, Peters JW (2013) New insights into the evolutionary history of biological nitrogen  
614 fixation. *Frontiers in microbiology* **4**, 201.

615 Brandes JA, Boctor NZ, Cody GD, Cooper BA, Hazen RM, Yoder HS (1998) Abiotic nitrogen  
616 reduction on the early Earth. *Nature* **395**, 365–367.

617 Brauer VS, Stomp M, Rosso C, Beusekom SA van, Emmerich B, Stal LJ, Huisman J (2013) Low  
618 temperature delays timing and enhances the cost of nitrogen fixation in the unicellular  
619 cyanobacterium *Cyanothece*. *The ISME Journal* **7**, 2105–2115.

620 Brigle KE, Weiss MC, Newton WE, Dean DR (1987) Products of the iron-molybdenum  
621 cofactor-specific biosynthetic genes, *nifE* and *nifN*, are structurally homologous to the products  
622 of the nitrogenase molybdenum-iron protein genes, *nifD* and *nifK*. *Journal of bacteriology* **169**,  
623 1547–53.

624 Brocks JJ, Jarrett AJM, Sirantoine E, Hallmann C, Hoshino Y, Liyanage T (2017) The rise of  
625 algae in Cryogenian oceans and the emergence of animals. *Nature* **548**, 578–581.

626 Bromham L, Duchêne S, Hua X, Ritchie AM, Duchêne DA, Ho SYW (2018) Bayesian  
627 molecular dating: Opening up the black box. *Biological Reviews*.

628 Buick R (2007) Did the Proterozoic “Canfield Ocean” cause a laughing gas greenhouse?  
629 *Geobiology* **5**, 97–100.

630 Burke C, Steinberg P, Rusch D, Kjelleberg S, Thomas T (2011) Bacterial community assembly  
631 based on functional genes rather than species. *Proceedings of the National Academy of Sciences*  
632 *of the United States of America* **108**, 14288–14293.

633 Canfield D, Kristensen E, Thamdrup B (2005) *Aquatic Geomicrobiology, Volume 48*.

634 Canfield DE, Glazer AN, Falkowski PG (2010) The evolution and future of Earth’s nitrogen  
635 cycle. *Science* **330**, 192–6.

636 Canfield DE, Zhang S, Frank AB, Wang X, Wang H, Su J, Ye Y, Frei R (2018) Highly  
637 fractionated chromium isotopes in Mesoproterozoic-aged shales and atmospheric oxygen. *Nature*  
638 *Communications* **9**, 2871.

639 Capella-Gutierrez S, Silla-Martinez JM, Gabaldon T (2009) trimAl: a tool for automated  
640 alignment trimming in large-scale phylogenetic analyses. *Bioinformatics* **25**, 1972–1973.

641 Coleman ML, Chisholm SW (2010) Ecosystem-specific selection pressures revealed through  
642 comparative population genomics. *Proceedings of the National Academy of Sciences of the*  
643 *United States of America* **107**, 18634–9.

644 Cox GM, Jarrett A, Edwards D, Crockford PW, Halverson GP, Collins AS, Poirier A, Li Z-X  
645 (2016) Basin redox and primary productivity within the Mesoproterozoic Roper Seaway.  
646 *Chemical Geology* **440**, 101–114.

647 Crowe SA, Døssing LN, Beukes NJ, Bau M, Kruger SJ, Frei R, Canfield DE (2013)  
648 Atmospheric oxygenation three billion years ago. *Nature* **501**, 535–538.

649 Czaja AD, Johnson CM, Beard BL, Roden EE, Li W, Moorbath S (2013) Biological Fe oxidation  
650 controlled deposition of banded iron formation in the ca. 3770 Ma Isua Supracrustal Belt (West  
651 Greenland). *Earth and Planetary Science Letters* **363**, 192–203.

652 Darling AE, Jospin G, Lowe E, Matsen FA, Bik HM, Eisen JA (2014) PhyloSift: phylogenetic  
653 analysis of genomes and metagenomes. *PeerJ* **2**, e243.

654 Daubin V, Ochman H (2004) Bacterial Genomes as New Gene Homes: The Genealogy of  
655 ORFans in *E. coli*. *Genome Research* **14**, 1036–1042.

656 David LA, Alm EJ (2011) Rapid evolutionary innovation during an Archaean genetic expansion.  
657 *Nature* **469**, 93–6.

658 Delmont TO, Quince C, Shaiber A, Esen ÖC, Lee ST, Rappé MS, MacLellan SL, Lückner S, Eren  
659 AM (2018) Nitrogen-fixing populations of Planctomycetes and Proteobacteria are abundant in  
660 surface ocean metagenomes. *Nature Microbiology* **3**, 804–813.

661 Drummond AJ, Ho SYW, Phillips MJ, Rambaut A (2006) Relaxed Phylogenetics and Dating  
662 with Confidence. *PLoS Biology* **4**, e88.

663 Edgar RC (2004) MUSCLE: multiple sequence alignment with high accuracy and high  
664 throughput. *Nucleic Acids Research* **32**, 1792–1797.

665 Eigenbrode JL, Freeman KH (2006) Late Archean rise of aerobic microbial ecosystems.  
666 *Proceedings of the National Academy of Sciences of the United States of America* **103**, 15759–  
667 15764.

668 Falkowski PG, Godfrey L V (2008) Electrons, life and the evolution of Earth's oxygen cycle.  
669 *Philosophical Transactions of the Royal Society B: Biological Sciences* **363**, 2705–2716.

670 Fani R, Gallo R, Liò P (2000) Molecular Evolution of Nitrogen Fixation: The Evolutionary  
671 History of the *nifD*, *nifK*, *nifE*, and *nifN* Genes. *Journal of Molecular Evolution* **51**, 1–11.

- 672 Fournier GP, Gogarten JP (2010) Rooting the ribosomal tree of life. *Molecular biology and*  
673 *evolution* **27**, 1792–801.
- 674 Gaby JC, Buckley DH (2014) A comprehensive aligned nifH gene database: a multipurpose tool  
675 for studies of nitrogen-fixing bacteria. *Database* **2014**, bau001.
- 676
- 677 Gallon JR (1981) The oxygen sensitivity of nitrogenase: a problem for biochemists and micro-  
678 organisms. *Trends in Biochemical Sciences* **6**, 19–23.
- 679 Garcia AK, McShea H, Kolaczowski B, Kaçar B (2020) Reconstructing the evolutionary  
680 history of nitrogenases: Evidence for ancestral molybdenum cofactor utilization. *Geobiology*  
681 gbi.12381.
- 682 Garvin J, Buick R, Anbar AD, Arnold GL, Kaufman AJ (2009a) Isotopic Evidence for an  
683 Aerobic Nitrogen Cycle in the Latest Archean. *Science* **323**, 1045–1048.
- 684 Garvin J, Buick R, Anbar AD, Arnold GL, Kaufman AJ (2009b) Isotopic evidence for an aerobic  
685 nitrogen cycle in the latest Archean. *Science* **323**, 1045–8.
- 686 Giblin A., Tobias CR, Song B, Weston N, Banta GT, Rivera-Monroy VH (2013) The importance  
687 of dissimilatory nitrate reduction to ammonium (DNRA) in the nitrogen cycle of coastal  
688 ecosystems. *Oceanography* **26**, 124–131.
- 689 Gibson TM, Shih PM, Cumming VM, Fischer WW, Crockford PW, Hodskiss MSW, Worndle S,  
690 Creaser RA, Rainbird RH, Skulski TM, Halverson GP (2018) Precise age of Bangiomorpha  
691 pubescens dates the origin of eukaryotic photosynthesis. *Geology* **46**, 135–138.
- 692 Godfrey L V., Falkowski PG (2009) The cycling and redox state of nitrogen in the Archaean  
693 ocean. *Nature Geoscience* **2**, 725–729.
- 694 Gogarten JP, Townsend JP (2005) Horizontal gene transfer, genome innovation and evolution.  
695 *Nature reviews. Microbiology* **3**, 679–87.
- 696 Hoffman PF, Abbot DS, Ashkenazy Y, Benn DI, Brocks JJ, Cohen PA, Cox GM, Creveling JR,  
697 Donnadieu Y, Erwin DH, Fairchild IJ, Ferreira D, Goodman JC, Halverson GP, Jansen MF, Hir  
698 G Le, Love GD, Macdonald FA, Maloof AC, Partin CA, Ramstein G, Rose BEJ, Rose C V.,  
699 Sadler PM, Tziperman E, Voigt A, Warren SG (2017) Snowball Earth climate dynamics and  
700 Cryogenian geology-geobiology. *Science Advances* **3**, e1600983.
- 701 Howard JB, Kechris KJ, Rees DC, Glazer AN (2013) Multiple amino acid sequence alignment  
702 nitrogenase component 1: insights into phylogenetics and structure-function relationships. *PloS*

703 *one* **8**, e72751.

704 Hug LA, Baker BJ, Anantharaman K, Brown CT, Probst AJ, Castelle CJ, Butterfield CN,  
705 Hernsdorf AW, Amano Y, Ise K, Suzuki Y, Dudek N, Relman DA, Finstad KM, Amundson R,  
706 Thomas BC, Banfield JF (2016) A new view of the tree of life. *Nature Microbiology* **1**, 16048.

707 Hyatt D, Chen G-L, LoCascio PF, Land ML, Larimer FW, Hauser LJ (2010) Prodigal:  
708 prokaryotic gene recognition and translation initiation site identification. *BMC Bioinformatics*  
709 **11**, 119.

710 Isson TT, Love GD, Dupont CL, Reinhard CT, Zumberge AJ, Asael D, Gueguen B, McCrow J,  
711 Gill BC, Owens J, Rainbird RH, Rooney AD, Zhao M-Y, Stueeken EE, Konhauser KO, John  
712 SG, Lyons TW, Planavsky NJ (2018) Tracking the rise of eukaryotes to ecological dominance  
713 with zinc isotopes. *Geobiology* **16**, 341–352.

714 Joerger RD, Bishop PE, Evans HJ (1988) Bacterial Alternative Nitrogen Fixation Systems. *CRC*  
715 *Critical Reviews in Microbiology* **16**, 1–14.

716 Johnson BW, Goldblatt C (2018) EarthN: A new earth system nitrogen model. *Geochemistry*,  
717 *Geophysics, Geosystems*.

718 Jones CM, Stres BB, Rosenquist M, Hallin S (2008) Phylogenetic analysis of nitrite, nitric oxide,  
719 and nitrous oxide respiratory enzymes reveal a complex evolutionary history for denitrification.  
720 *Molecular Biology and Evolution* **25**, 1955–1966.

721 Kaiser JT, Hu Y, Wiig JA, Rees DC, Ribbe MW (2011) Structure of precursor bound NifEN: a  
722 nitrogenase FeMo cofactor maturase/insertase. *Science (New York, N.Y.)* **331**, 91.

723 Kalyaanamoorthy S, Minh BQ, Wong TKF, Haeseler A von, Jermiin LS (2017) ModelFinder:  
724 fast model selection for accurate phylogenetic estimates. *Nature Methods* **14**, 587–589.

725 Keable SM, Vertemara J, Zadovnyy OA, Eilers BJ, Danyal K, Rasmussen AJ, Gioia L De,  
726 Zampella G, Seefeldt LC, Peters JW (2018) Structural characterization of the nitrogenase  
727 molybdenum-iron protein with the substrate acetylene trapped near the active site. *Journal of*  
728 *Inorganic Biochemistry* **180**, 129–134.

729 Kechris KJ, Lin JC, Bickel PJ, Glazer AN (2006) Quantitative exploration of the occurrence of  
730 lateral gene transfer by using nitrogen fixation genes as a case study. *Proceedings of the National*  
731 *Academy of Sciences of the United States of America* **103**, 9584–9.

732 Kipp MAMA, Stueken EEEE, Yun M, Bekker A, Buick R (2018) Pervasive aerobic nitrogen  
733 cycling in the surface ocean across the Paleoproterozoic Era. *Earth and Planetary Science*

- 734 *Letters* **500**, 117–126.
- 735 Kitts PA, Church DM, Thibaud-Nissen F, Choi J, Hem V, Sapojnikov V, Smith RG, Tatusova T,
- 736 Xiang C, Zherikov A, DiCuccio M, Murphy TD, Pruitt KD, Kimchi A (2016) Assembly: a
- 737 resource for assembled genomes at NCBI. *Nucleic acids research* **44**, D73–80.
- 738 Knoll AH, Nowak MA (2017) The timetable of evolution. *Science Advances* **3**, e1603076.
- 739 Koehler MC, Buick R, Barley ME (2019) Nitrogen isotope evidence for anoxic deep marine
- 740 environments from the Mesoarchean Mosquito Creek Formation, Australia. *Precambrian*
- 741 *Research* **320**, 281–290.
- 742 Koehler MC, Buick R, Kipp MA, Stüeken EE, Zaloumis J (2018) Transient surface ocean
- 743 oxygenation recorded in the ~2.66-Ga Jeerinah Formation, Australia. *Proceedings of the*
- 744 *National Academy of Sciences of the United States of America* **115**, 7711–7716.
- 745 Koonin E V., Makarova KS, Aravind L (2001) Horizontal gene transfer in prokaryotes:
- 746 Quantification and classification. *Annual Review of Microbiology* **55**, 709–742.
- 747 Kozlov AM, Darriba D, Flouri T, Morel B, Stamatakis A (2019) RAxML-NG: a fast, scalable
- 748 and user-friendly tool for maximum likelihood phylogenetic inference. *Bioinformatics* **35**, 4453–
- 749 4455.
- 750 Kuypers MMM, Marchant HK, Kartal B (2018) The microbial nitrogen-cycling network. *Nature*
- 751 *reviews. Microbiology* **16**, 263–276.
- 752 Lartillot N, Lepage T, Blanquart S (2009) PhyloBayes 3: A Bayesian software package for
- 753 phylogenetic reconstruction and molecular dating. *Bioinformatics* **25**, 2286–2288.
- 754 Lee CC, Hu Y, Ribbe MW (2010) Vanadium nitrogenase reduces CO. *Science (New York, N.Y.)*
- 755 **329**, 642.
- 756 Lepage T, Bryant D, Philippe H, Lartillot N (2007) A general comparison of relaxed molecular
- 757 clock models. *Molecular biology and evolution* **24**, 2669–80.
- 758 Lipschultz F, Wofsy SC, Ward BB, Codispoti LA, Friedrich G, Elkins JW (1990) Bacterial
- 759 transformations of inorganic nitrogen in the oxygen-deficient waters of the Eastern Tropical
- 760 South Pacific Ocean. *Deep Sea Research Part A. Oceanographic Research Papers* **37**, 1513–
- 761 1541.
- 762 Löscher CR, Kock A, Könneke M, LaRoche J, Bange HW, Schmitz RA (2012) Production of
- 763 oceanic nitrous oxide by ammonia-oxidizing archaea. *Biogeosciences* **9**, 2419–2429.
- 764 Luo G, Junium CK, Izon G, Ono S, Beukes NJ, Algeo TJ, Cui Y, Xie S, Summons RE (2018)

765 Nitrogen fixation sustained productivity in the wake of the Palaeoproterozoic Great Oxygenation  
766 Event. *Nature Communications* **9**, 978.

767 Lyons TW, Reinhard CT, Planavsky NJ (2014) The rise of oxygen in Earth's early ocean and  
768 atmosphere. *Nature* **506**, 307–315.

769 Magnabosco C, Moore KR, Wolfe JM, Fournier GP (2018) Dating phototrophic microbial  
770 lineages with reticulate gene histories. *Geobiology* **16**, 179–189.

771 Marty B, Zimmermann L, Pujol M, Burgess R, Philippot P (2013) Nitrogen isotopic composition  
772 and density of the Archean atmosphere. *Science* **342**, 101–104.

773 Mather TA, Pyle DM, Allen AG (2004) Volcanic source for fixed nitrogen in the early Earth's  
774 atmosphere. *Geology* **32**, 905.

775 McGlynn SE, Boyd ES, Peters JW, Orphan VJ (2012) Classifying the metal dependence of  
776 uncharacterized nitrogenases. *Frontiers in microbiology* **3**, 419.

777 McInerney JO, McNally A, O'Connell MJ (2017) Why prokaryotes have pangenomes. *Nature*  
778 *Microbiology* **2**, 17040.

779 Mendler K, Chen H, Parks DH, Lobb B, Hug LA, Doxey AC (2019) AnnoTree: visualization  
780 and exploration of a functionally annotated microbial tree of life. *Nucleic Acids Research* **47**,  
781 4442–4448.

782 Michiels CC, Darchambeau F, Roland FAE, Morana C, Llíros M, García-Armisen T, Thamdrup  
783 B, Borges A V., Canfield DE, Servais P, Descy J-P, Crowe SA (2017) Iron-dependent nitrogen  
784 cycling in a ferruginous lake and the nutrient status of Proterozoic oceans. *Nature Geoscience*  
785 **10**, 217–221.

786 Miller RW, Eady RR (1988) Molybdenum and vanadium nitrogenases of *Azotobacter*  
787 *chroococcum*. Low temperature favours N<sub>2</sub> reduction by vanadium nitrogenase. *Biochemical*  
788 *Journal* **256**, 429–432.

789 Mirkin BG, Fenner TI, Galperin MY, Koonin E V (2003) Algorithms for computing  
790 parsimonious evolutionary scenarios for genome evolution, the last universal common ancestor  
791 and dominance of horizontal gene transfer in the evolution of prokaryotes. *BMC Evolutionary*  
792 *Biology* **3**, 2.

793 Mojzsis SJ, Arrhenius G, McKeegan KD, Harrison TM, Nutman AP, Friend CRL (1996)  
794 Evidence for life on Earth before 3,800 million years ago. *Nature* **384**, 55–59.

795 Moore EK, Hao J, Spielman SJ, Yee N (2020) The evolving redox chemistry and bioavailability

of vanadium in deep time. *Geobiology* **18**, 127–138.

Moore EK, Jelen BI, Giovannelli D, Raanan H, Falkowski PG (2017) Metal availability and the expanding network of microbial metabolisms in the Archaean eon. *Nature Geoscience* **10**, 629–636.

Moulana A, Anderson RE, Fortunato CS, Huber JA (2020) Selection is a significant driver of gene gain and loss in the pangenome of the bacterial genus *Sulfurovum* in geographically distinct deep-sea hydrothermal vents. *mSystems*.

Mus F, Alleman AB, Pence N, Seefeldt LC, Peters JW (2018) Exploring the alternatives of biological nitrogen fixation. *Metallomics* **10**, 523–538.

Mus F, Colman DR, Peters JW, Boyd ES (2019) Geobiological feedbacks, oxygen, and the evolution of nitrogenase. *Free Radical Biology and Medicine*.

Navarro-González R, McKay CP, Mvondo DN (2001) A possible nitrogen crisis for Archaean life due to reduced nitrogen fixation by lightning. *Nature* **412**, 61–64.

Noffke N, Beukes N, Bower D, Hazen RM, Swift DJP (2007) An actualistic perspective into Archean worlds - (cyano-)bacterially induced sedimentary structures in the siliciclastic Nhlazatse Section, 2.9 Ga Pongola Supergroup, South Africa. *Geobiology* **6**, 5–20.

Nutman AP, Bennett VC, Friend CRL, Kranendonk MJ Van, Chivas AR (2016) Rapid emergence of life shown by discovery of 3,700-million-year-old microbial structures. *Nature* **537**, 535–538.

Ogata H, Goto S, Sato K, Fujibuchi W, Bono H, Kanehisa M (1999) KEGG: Kyoto Encyclopedia of Genes and Genomes. *Nucleic Acids Research* **27**, 29–34.

Olson SL, Kump LR, Kasting JF (2013) Quantifying the areal extent and dissolved oxygen concentrations of Archean oxygen oases. *Chemical Geology* **362**, 35–43.

Ossa Ossa F, Hofmann A, Spangenberg JE, Poulton SW, Stüeken EE, Schoenberg R, Eickmann B, Wille M, Butler M, Bekker A (2019) Limited oxygen production in the Mesoarchean ocean. *Proceedings of the National Academy of Sciences of the United States of America* **116**, 6647–6652.

Pang K, Tang Q, Chen L, Wan B, Niu C, Yuan X, Xiao S (2018) Nitrogen-Fixing Heterocystous Cyanobacteria in the Tonian Period. *Current Biology* **28**, 616–622.

Pang K, Tang Q, Schiffbauer JD, Yao J, Yuan X, Wan B, Chen L, Ou Z, Xiao S (2013) The nature and origin of nucleus-like intracellular inclusions in Paleoproterozoic eukaryote

827 microfossils. *Geobiology* **11**, 499–510.

828 Planavsky NJ, Asael D, Hofmann A, Reinhard CT, Lalonde S V, Knudsen A, Wang X, Ossa  
829 Ossa F, Pecoits E, Smith AJB, Beukes NJ, Bekker A, Johnson TM, Konhauser KO, Lyons TW,  
830 Rouxel OJ (2014) Evidence for oxygenic photosynthesis half a billion years before the Great  
831 Oxidation Event. *Nature Geoscience* **7**, 283–286.

832 Polz MF, Alm EJ, Hanage WP (2013) Horizontal gene transfer and the evolution of bacterial and  
833 archaeal population structure. *Trends in Genetics* **29**, 170–5.

834 Popa O, Hazkani-Covo E, Landan G, Martin W, Dagan T (2011) Directed networks reveal  
835 genomic barriers and DNA repair bypasses to lateral gene transfer among prokaryotes. *Genome*  
836 *research* **21**, 599–609.

837 Raymond J, Siefert JL, Staples CR, Blankenship RE (2004) The natural history of nitrogen  
838 fixation. *Molecular Biology and Evolution* **21**, 541–54.

839 Reinhard CT, Planavsky NJ, Robbins LJ, Partin CA, Gill BC, Lalonde S V., Bekker A,  
840 Konhauser KO, Lyons TW (2013) Proterozoic ocean redox and biogeochemical stasis.  
841 *Proceedings of the National Academy of Sciences* **110**, 5357–5362.

842 Ren M, Feng X, Huang Y, Wang H, Hu Z, Clingenpeel S, Swan BK, Fonseca MM, Posada D,  
843 Stepanauskas R, Hollibaugh JT, Foster PG, Woyke T, Luo H (2019) Phylogenomics suggests  
844 oxygen availability as a driving force in Thaumarchaeota evolution. *The ISME Journal* **13**,  
845 2150–2161.

846 Revell LJ (2012) phytools: an R package for phylogenetic comparative biology (and other  
847 things). *Methods in Ecology and Evolution* **3**, 217–223.

848 Roberson AL, Roadt J, Halevy I, Kasting JF (2011) Greenhouse warming by nitrous oxide and  
849 methane in the Proterozoic Eon. *Geobiology* **9**, 313–320.

850 Rosing MT (1999) <sup>13</sup>C-Depleted carbon microparticles in >3700-Ma sea-floor sedimentary  
851 rocks from west greenland. *Science (New York, N.Y.)* **283**, 674–6.

852 Sánchez-Baracaldo P, Ridgwell A, Raven JA (2014) A neoproterozoic transition in the marine  
853 nitrogen cycle. *Current Biology* **24**, 652–657.

854 Santos PC Dos, Fang Z, Mason SW, Setubal JC, Dixon R (2012) Distribution of nitrogen  
855 fixation and nitrogenase-like sequences amongst microbial genomes. *BMC Genomics* **13**, 162.

856 Schidlowski M (1988) A 3,800-million-year isotopic record of life from carbon in sedimentary  
857 rocks. *Nature* **333**, 313–318.

- 858 Schidlowski M, Hayes JM, Kaplan IR (1983) Isotopic inferences of ancient biochemistries:  
859 Carbon, sulfur, hydrogen, and nitrogen. In: *Earth's Earliest Biosphere, Its Origin and Evolution*  
860 (ed. Schopf JW). Princeton University Press, Princeton, N.J., pp. 149–186.
- 861 Schoepp-Cothenet B, Lis R van, Atteia A, Baymann F, Capowicz L, Ducluzeau A-L, Duval S,  
862 Brink F ten, Russell MJ, Nitschke W (2013) On the universal core of bioenergetics. *Biochimica*  
863 *et Biophysica Acta (BBA) - Bioenergetics* **1827**, 79–93.
- 864 Schwartz JH, Maresca B (2006) Do Molecular Clocks Run at All? A Critique of Molecular  
865 Systematics. *Biological Theory* **1**, 357–371.
- 866 Scott C, Lyons TW, Bekker A, Shen Y, Poulton SW, Chu X, Anbar AD (2008) Tracing the  
867 stepwise oxygenation of the Proterozoic ocean. *Nature* **452**, 456–459.
- 868 Shang M, Tang D, Shi X, Zhou L, Zhou X, Song H, Jiang G (2019) A pulse of oxygen increase  
869 in the early Mesoproterozoic ocean at ca. 1.57–1.56 Ga. *Earth and Planetary Science Letters*  
870 **527**, 115797.
- 871 Som SM, Buick R, Hagadorn JW, Blake TS, Perreault JM, Harnmeijer JP, Catling DC (2016)  
872 Earth's air pressure 2.7 billion years ago constrained to less than half of modern levels. *Nature*  
873 *Geoscience* **9**, 448–451.
- 874 Stamatakis A (2014) RAxML version 8: a tool for phylogenetic analysis and post-analysis of  
875 large phylogenies. *Bioinformatics* **30**, 1312–1313.
- 876 Stanton CL, Reinhard CT, Kasting JF, Ostrom NE, Haslun JA, Lyons TW, Glass JB (2018)  
877 Nitrous oxide from chemodenitrification□: A possible missing link in the Proterozoic  
878 greenhouse and the evolution of aerobic respiration 1–13.
- 879 Stein LY, Klotz MG (2016) The nitrogen cycle. *Current Biology* **26**, R94–R98.
- 880 Stolz JF, Basu P (2002) Evolution of Nitrate Reductase: Molecular and Structural Variations on  
881 a Common Function. *ChemBioChem* **3**, 198–206.
- 882 Stüeken EE, Buick R, Guy BM, Koehler MC (2015) Isotopic evidence for biological nitrogen  
883 fixation by molybdenum-nitrogenase from 3.2 Gyr. *Nature*.
- 884 Stüeken EE, Catling DC, Buick R (2012) Contributions to late Archaean sulphur cycling by life  
885 on land. *Nature Geoscience* **5**, 722–725.
- 886 Stüeken EE, Kipp MA, Koehler MC, Buick R (2016a) The evolution of Earth's biogeochemical  
887 nitrogen cycle. *Earth-Science Reviews* **160**, 220–239.
- 888 Stüeken EE, Kipp MA, Koehler MC, Schwieterman EW, Johnson B, Buick R (2016b) Modeling

889  $p N_2$  through Geological Time: Implications for Planetary Climates and Atmospheric  
890 Biosignatures. *Astrobiology* **16**, 949–963.

891 Summers DP, Chang S (1993) Prebiotic ammonia from reduction of nitrite by iron (II) on the  
892 early Earth. *Nature* **365**, 630–633.

893 The Uniprot Consortium (2017) UniProt: the universal protein knowledgebase. *Nucleic Acids*  
894 *Research* **45**, D158–D169.

895 Voss M, Bange HW, Dippner JW, Middelburg JJ, Montoya JP, Ward B (2013) The marine  
896 nitrogen cycle: recent discoveries, uncertainties and the potential relevance of climate change.  
897 *Philosophical Transactions of the Royal Society B: Biological Sciences* **368**, 20130121–  
898 20130121.

899 Wada E, Hatton A (1971) Nitrite metabolism in the euphotic layer of the central North Pacific  
900 Ocean. *Limnology and Oceanography* **16**, 766–772.

901 Waterhouse AM, Procter JB, Martin DMA, Clamp M, Barton GJ (2009) Jalview Version 2--a  
902 multiple sequence alignment editor and analysis workbench. *Bioinformatics* **25**, 1189–1191.

903 Weiss MC, Sousa FL, Mrnjavac N, Neukirchen S, Roettger M, Nelson-Sathi S, Martin WF  
904 (2016) The physiology and habitat of the last universal common ancestor. *Nature Microbiology*  
905 **1**, 16116.

906 Yang J, Junium CK, Grassineau N V., Nisbet EG, Izon G, Mettam C, Martin A, Zerkle AL  
907 (2019) Ammonium availability in the Late Archaean nitrogen cycle. *Nature Geoscience* **12**, 553–  
908 557.

909 Zaremba-Niedzwiedzka K, Caceres EF, Saw JH, Bäckström D, Juzokaite L, Vancaester E, Seitz  
910 KW, Anantharaman K, Starnawski P, Kjeldsen KU, Stott MB, Nunoura T, Banfield JF,  
911 Schramm A, Baker BJ, Spang A, Ettema TJG (2017) Asgard archaea illuminate the origin of  
912 eukaryotic cellular complexity. *Nature* **541**, 353–358.

913 Zerkle AL, Mikhail S (2017) The geobiological nitrogen cycle: From microbes to the mantle.  
914 *Geobiology*.

915 Zerkle AL, Poulton SW, Newton RJ, Mettam C, Claire MW, Bekker A, Junium CK (2017a)  
916 Onset of the aerobic nitrogen cycle during the Great Oxidation Event. *Nature* **542**, 465–467.

917 Zerkle AL, Poulton SW, Newton RJ, Mettam C, Claire MW, Bekker A, Junium CK (2017b)  
918 Onset of the aerobic nitrogen cycle during the Great Oxidation Event. *Nature* **542**, 465–467.

919 Zhang K, Zhu X, Wood RA, Shi Y, Gao Z, Poulton SW (2018) Oxygenation of the

920 Mesoproterozoic ocean and the evolution of complex eukaryotes. *Nature Geoscience* **11**, 345–  
921 350.  
922  
923  
924

## Tables

| Calibration Event                                                | Date (Mya)     | Refs                                                                                                                                                     |
|------------------------------------------------------------------|----------------|----------------------------------------------------------------------------------------------------------------------------------------------------------|
| LUCA (set as root prior)                                         | 3800, 200 S.D. | Schidlowski <i>et al.</i> , 1983; Schidlowski, 1988; Mojzsis <i>et al.</i> , 1996; Rosing, 1999; Czaja <i>et al.</i> , 2013; Nutman <i>et al.</i> , 2016 |
| Origin of Methanogenesis                                         | >2700          | Eigenbrode & Freeman, 2006                                                                                                                               |
| Origin of Cyanobacteria                                          | >2450          | Bekker <i>et al.</i> , 2004                                                                                                                              |
| Origin of Eukaryotes                                             | >1700          | Pang <i>et al.</i> , 2013                                                                                                                                |
| Origin of plastids/Rhodophytes diverge                           | >1050          | Gibson <i>et al.</i> , 2018                                                                                                                              |
| Akinetes diverge from cyanobacteria lacking cell differentiation | >1000          | Pang <i>et al.</i> , 2018                                                                                                                                |

**Table 1.** Fossil calibration points used in Phylobayes runs. Calibration points were set as the hard constraint indicating the latest date by which a specific clade split. The selected time points reflect the dates for which there is the most consensus.

| Gene        | Number of genes identified |
|-------------|----------------------------|
| <i>amo</i>  | 4                          |
| <i>anfD</i> | 11                         |
| <i>anfK</i> | 10                         |
| <i>hao</i>  | 0                          |
| <i>napA</i> | 37                         |
| <i>narG</i> | 34                         |
| <i>nasA</i> | 28                         |
| <i>nifD</i> | 165                        |
| <i>nifK</i> | 92                         |
| <i>nifH</i> | 233                        |
| <i>nirB</i> | 39                         |
| <i>nirK</i> | 10                         |
| <i>nirS</i> | 16                         |
| <i>norB</i> | 36                         |
| <i>nosZ</i> | 21                         |
| <i>nrfA</i> | 48                         |
| <i>nxrA</i> | 34                         |
| <i>vnfD</i> | 6                          |
| <i>vnfK</i> | 6                          |

**Table 2.** Number of nitrogen-cycling genes identified within 254 bacterial and archaeal genomes that were included in the analysis. All genes were identified from ORFs using blastp with an e-value cutoff of 1e-12, then filtered using the Kofam Koala tool. Nitrogenases were further refined by identifying key residues (see Methods).

|             | CIR Clock Model |            |      |             | UGAM Clock Model |            |      |             |
|-------------|-----------------|------------|------|-------------|------------------|------------|------|-------------|
| Gene        | HGT             | Speciation | Loss | Duplication | HGT              | Speciation | Loss | Duplication |
| <i>anfD</i> | 7               | 7          | 4    | 0           | 7                | 7          | 4    | 0           |
| <i>anfK</i> | 6               | 7          | 4    | 0           | 6                | 7          | 4    | 0           |
| <i>napA</i> | 13              | 46         | 23   | 0           | 12               | 50         | 26   | 0           |
| <i>narG</i> | 15              | 29         | 15   | 4           | 14               | 32         | 17   | 4           |
| <i>nasA</i> | 5               | 27         | 6    | 1           | 5                | 27         | 6    | 1           |
| <i>nifD</i> | 48              | 176        | 60   | 0           | 51               | 169        | 56   | 0           |
| <i>nifK</i> | 35              | 103        | 48   | 1           | 34               | 107        | 51   | 1           |
| <i>nifH</i> | 68              | 224        | 72   | 12          | 74               | 202        | 56   | 12          |
| <i>nirB</i> | 14              | 34         | 13   | 3           | 13               | 38         | 16   | 3           |
| <i>nirK</i> | 4               | 9          | 5    | 1           | 4                | 9          | 5    | 1           |
| <i>nirS</i> | 7               | 13         | 6    | 1           | 7                | 13         | 6    | 1           |
| <i>norB</i> | 26              | 13         | 5    | 2           | 25               | 13         | 5    | 2           |
| <i>nosZ</i> | 13              | 5          | 0    | 2           | 13               | 5          | 0    | 2           |
| <i>nrfA</i> | 24              | 34         | 13   | 2           | 23               | 37         | 15   | 2           |
| <i>nrxA</i> | 13              | 34         | 18   | 4           | 13               | 34         | 18   | 4           |
| <i>vnfD</i> | 3               | 3          | 1    | 0           | 3                | 3          | 1    | 0           |
| <i>vnfK</i> | 3               | 3          | 1    | 0           | 3                | 3          | 1    | 0           |

**Table 3.** Frequencies of events inferred by AnGST for each gene as derived from both the CIR and UGAM clock models.

| Gene        | Upper node date | 95% confidence interval | Lower node date | 95% confidence interval | Midpoint between nodes | Geologic era     |
|-------------|-----------------|-------------------------|-----------------|-------------------------|------------------------|------------------|
| <i>vnfD</i> | 1445.24         | 1052.37, 1735.83        | 482.23          | 210.11, 778.444         | <b>963.73</b>          | Neoproterozoic   |
| <i>vnfK</i> | 1445.24         | 1052.37, 1735.83        | 482.23          | 210.11, 778.444         | <b>963.73</b>          | Neoproterozoic   |
| <i>nosZ</i> | 1325.57         | 1048.93, 1588.52        | 1139.65         | 851.174, 1408.81        | <b>1232.61</b>         | Mesoproterozoic  |
| <i>nirK</i> | 1452.66         | 1193.07, 1706.53        | 1343.08         | 1094.21, 1585.92        | <b>1397.87</b>         | Mesoproterozoic  |
| <i>nirS</i> | 1913.87         | 1694.13, 2144.31        | 1423.17         | 1153.32, 1677.23        | <b>1668.52</b>         | Paleoproterozoic |
| <i>norB</i> | 1913.87         | 1694.13, 2144.31        | 1423.17         | 1153.32, 1677.23        | <b>1668.52</b>         | Paleoproterozoic |
| <i>anfD</i> | 2349.58         | 2153.39, 2583.93        | 1745.53         | 1498.39, 1999.54        | <b>2047.55</b>         | Paleoproterozoic |
| <i>anfK</i> | 2349.58         | 2153.39, 2583.93        | 1745.53         | 1498.39, 1999.54        | <b>2047.55</b>         | Paleoproterozoic |

|             |         |                     |         |                     |                |                         |
|-------------|---------|---------------------|---------|---------------------|----------------|-------------------------|
| <b>nasA</b> | 2540.50 | 2351.4,<br>2778.03  | 2063.23 | 1848.31,<br>2293.91 | <b>2301.87</b> | <b>Paleoproterozoic</b> |
| <b>nrfA</b> | 2454.68 | 2178.51,<br>2737.37 | 2267.54 | 1918.96,<br>2574.71 | <b>2361.11</b> | <b>Paleoproterozoic</b> |
| <b>nirB</b> | 2748.37 | 2545.88,<br>2989.62 | 2603.25 | 2384.99,<br>2850.17 | <b>2675.81</b> | <b>Neoarchean</b>       |
| <b>nifK</b> | 2926.54 | 2734.92,<br>3180.11 | 2629.22 | 2415.05,<br>2877.89 | <b>2777.88</b> | <b>Neoarchean</b>       |
| <b>nxrA</b> | 2816.89 | 2630.27,<br>3063.26 | 2787.46 | 2603.09,<br>3029.43 | <b>2802.17</b> | <b>Mesoarchean</b>      |
| <b>napA</b> | 2816.89 | 2630.27,<br>3063.26 | 2787.46 | 2603.09,<br>3029.43 | <b>2802.17</b> | <b>Mesoarchean</b>      |
| <b>narG</b> | 2816.89 | 2630.27,<br>3063.26 | 2787.46 | 2603.09,<br>3029.43 | <b>2802.17</b> | <b>Mesoarchean</b>      |
| <b>nifD</b> | 2934.72 | 2744.91,<br>3187.67 | 2869.82 | 2682.33,<br>3118.74 | <b>2902.27</b> | <b>Mesoarchean</b>      |
| <b>nifH</b> | 3060.98 | 2863.64,<br>3325.02 | 3026.38 | 2832.29,<br>3286.79 | <b>3043.68</b> | <b>Mesoarchean</b>      |

**Table 4.** Inferred birth dates for nitrogen-cycling genes based on the chronogram generated using the CIR clock model with conservative calibration points. All gene birth events are inferred to occur between nodes on the species chronogram, and therefore our methods do not allow us to infer specific dates for gene birth events. Here we list the inferred timing for the earliest possible timing (upper node) and latest possible timing (lower node) with 95% confidence intervals as reported by PhyloBayes, as well as the calculated midpoint between the two node times. Times are reported in millions of years ago. The geological era reported in the right column corresponds to the midpoint between the upper and lower node. Given the uncertainty inherent in the estimation of node timings and inference in events, these are provided for geological reference and should not be taken as definitive timings. The equivalent table, generated using the UGAM clock model, is depicted as Supplementary Table 2.

## Figure Captions

**Figure 1. Schematic of the biological nitrogen cycle.** Arrows are labelled with the pathway to which they belong. All genes examined in this study are labeled next to the step they catalyze. Genes without sufficient data for subsequent analysis are labeled in grey. Adapted from Canfield et al. (2010).

**Figure 2. Species tree used for phylogenetic analysis.** Maximum likelihood phylogeny based on an alignment of concatenated single-copy universal proteins from 308 genomes. Well-represented bacterial and archaeal phyla are labelled in black text. Bacterial clades are labeled in

alternating colors of blue, archaea in green, eukaryotes in red. Bootstrap values (from 100 bootstraps) greater than 50 are shown as transparent gray circles, with larger circles representing higher bootstrap values.

**Figure 3. Histograms and density plots of all speciation, loss, duplication and horizontal gene transfer (HGT) events.** All events are shown in blue, HGT events alone are shown in green. Events were inferred by reconciling phylogenetic trees of nitrogen-cycling genes with a chronogram generated using a CIR clock model and conservative calibration points. Y-axis represents proportion of all events (blue) or HGT events only (green). Borders around graphs indicate the metabolic process that the gene is involved in. Histograms are ordered according to the earliest time point at which a speciation, loss, duplication, or HGT event occurred. An equivalent figure with dates inferred from the UGAM clock model is shown in Supplementary Figure 3.

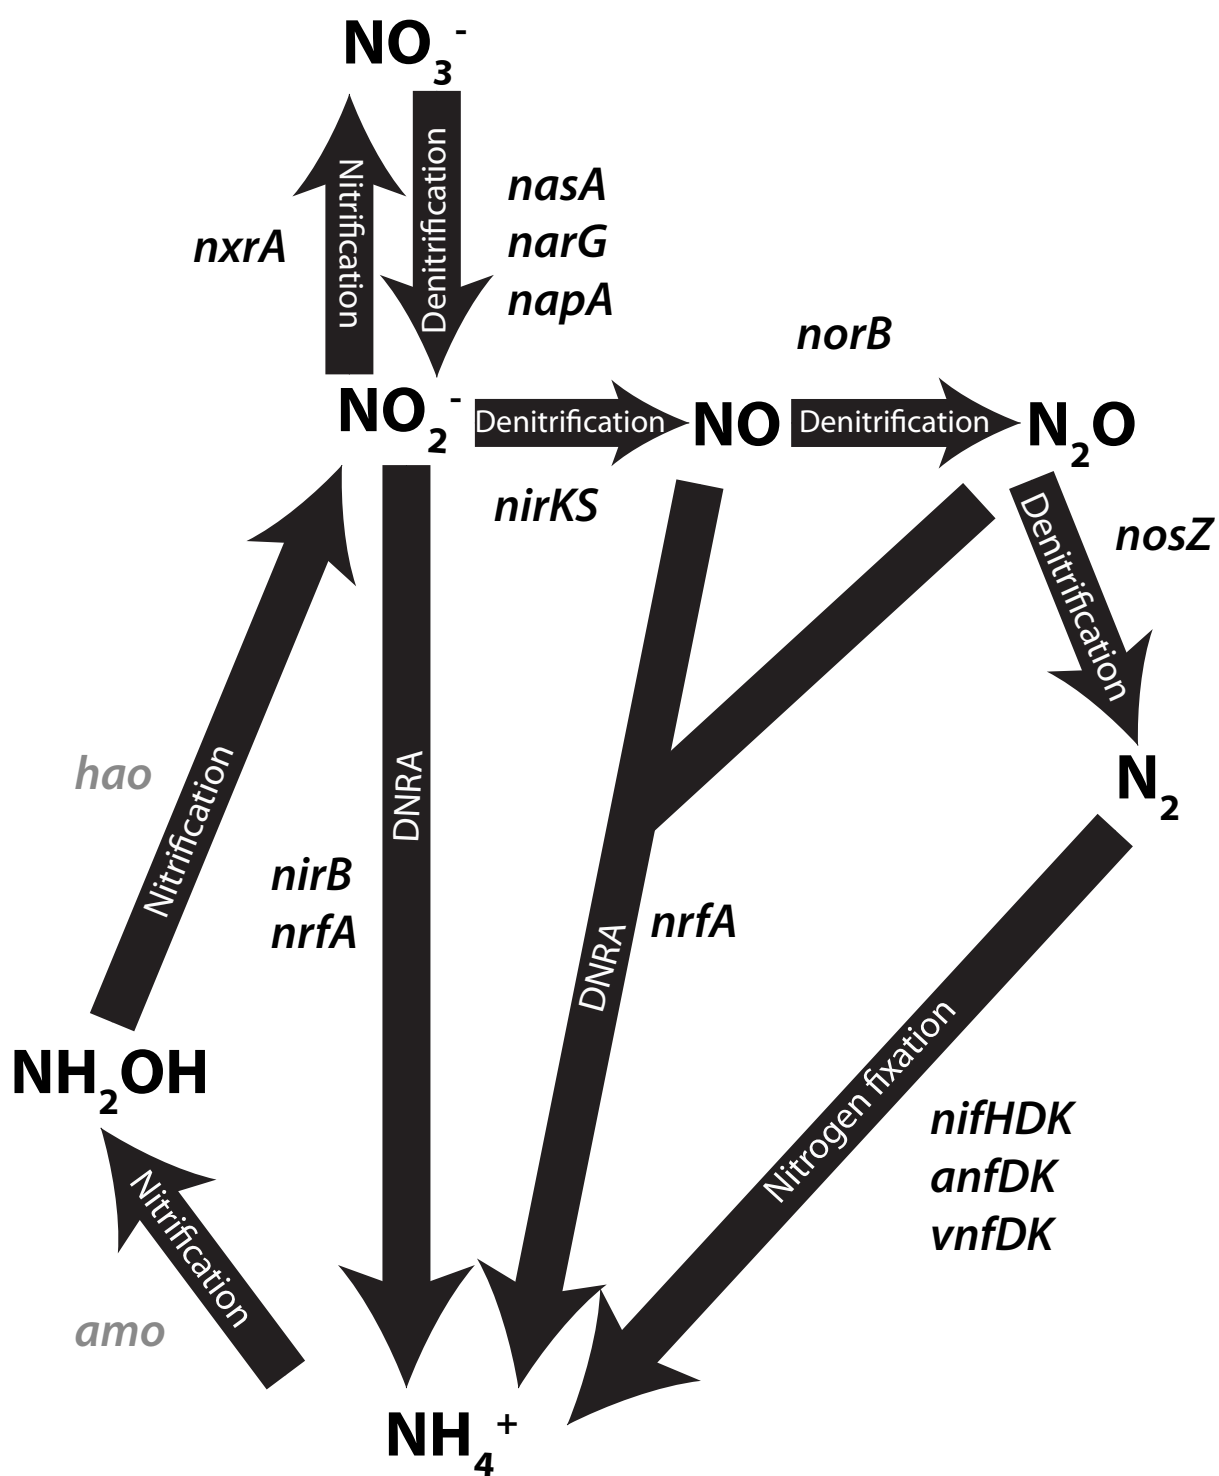

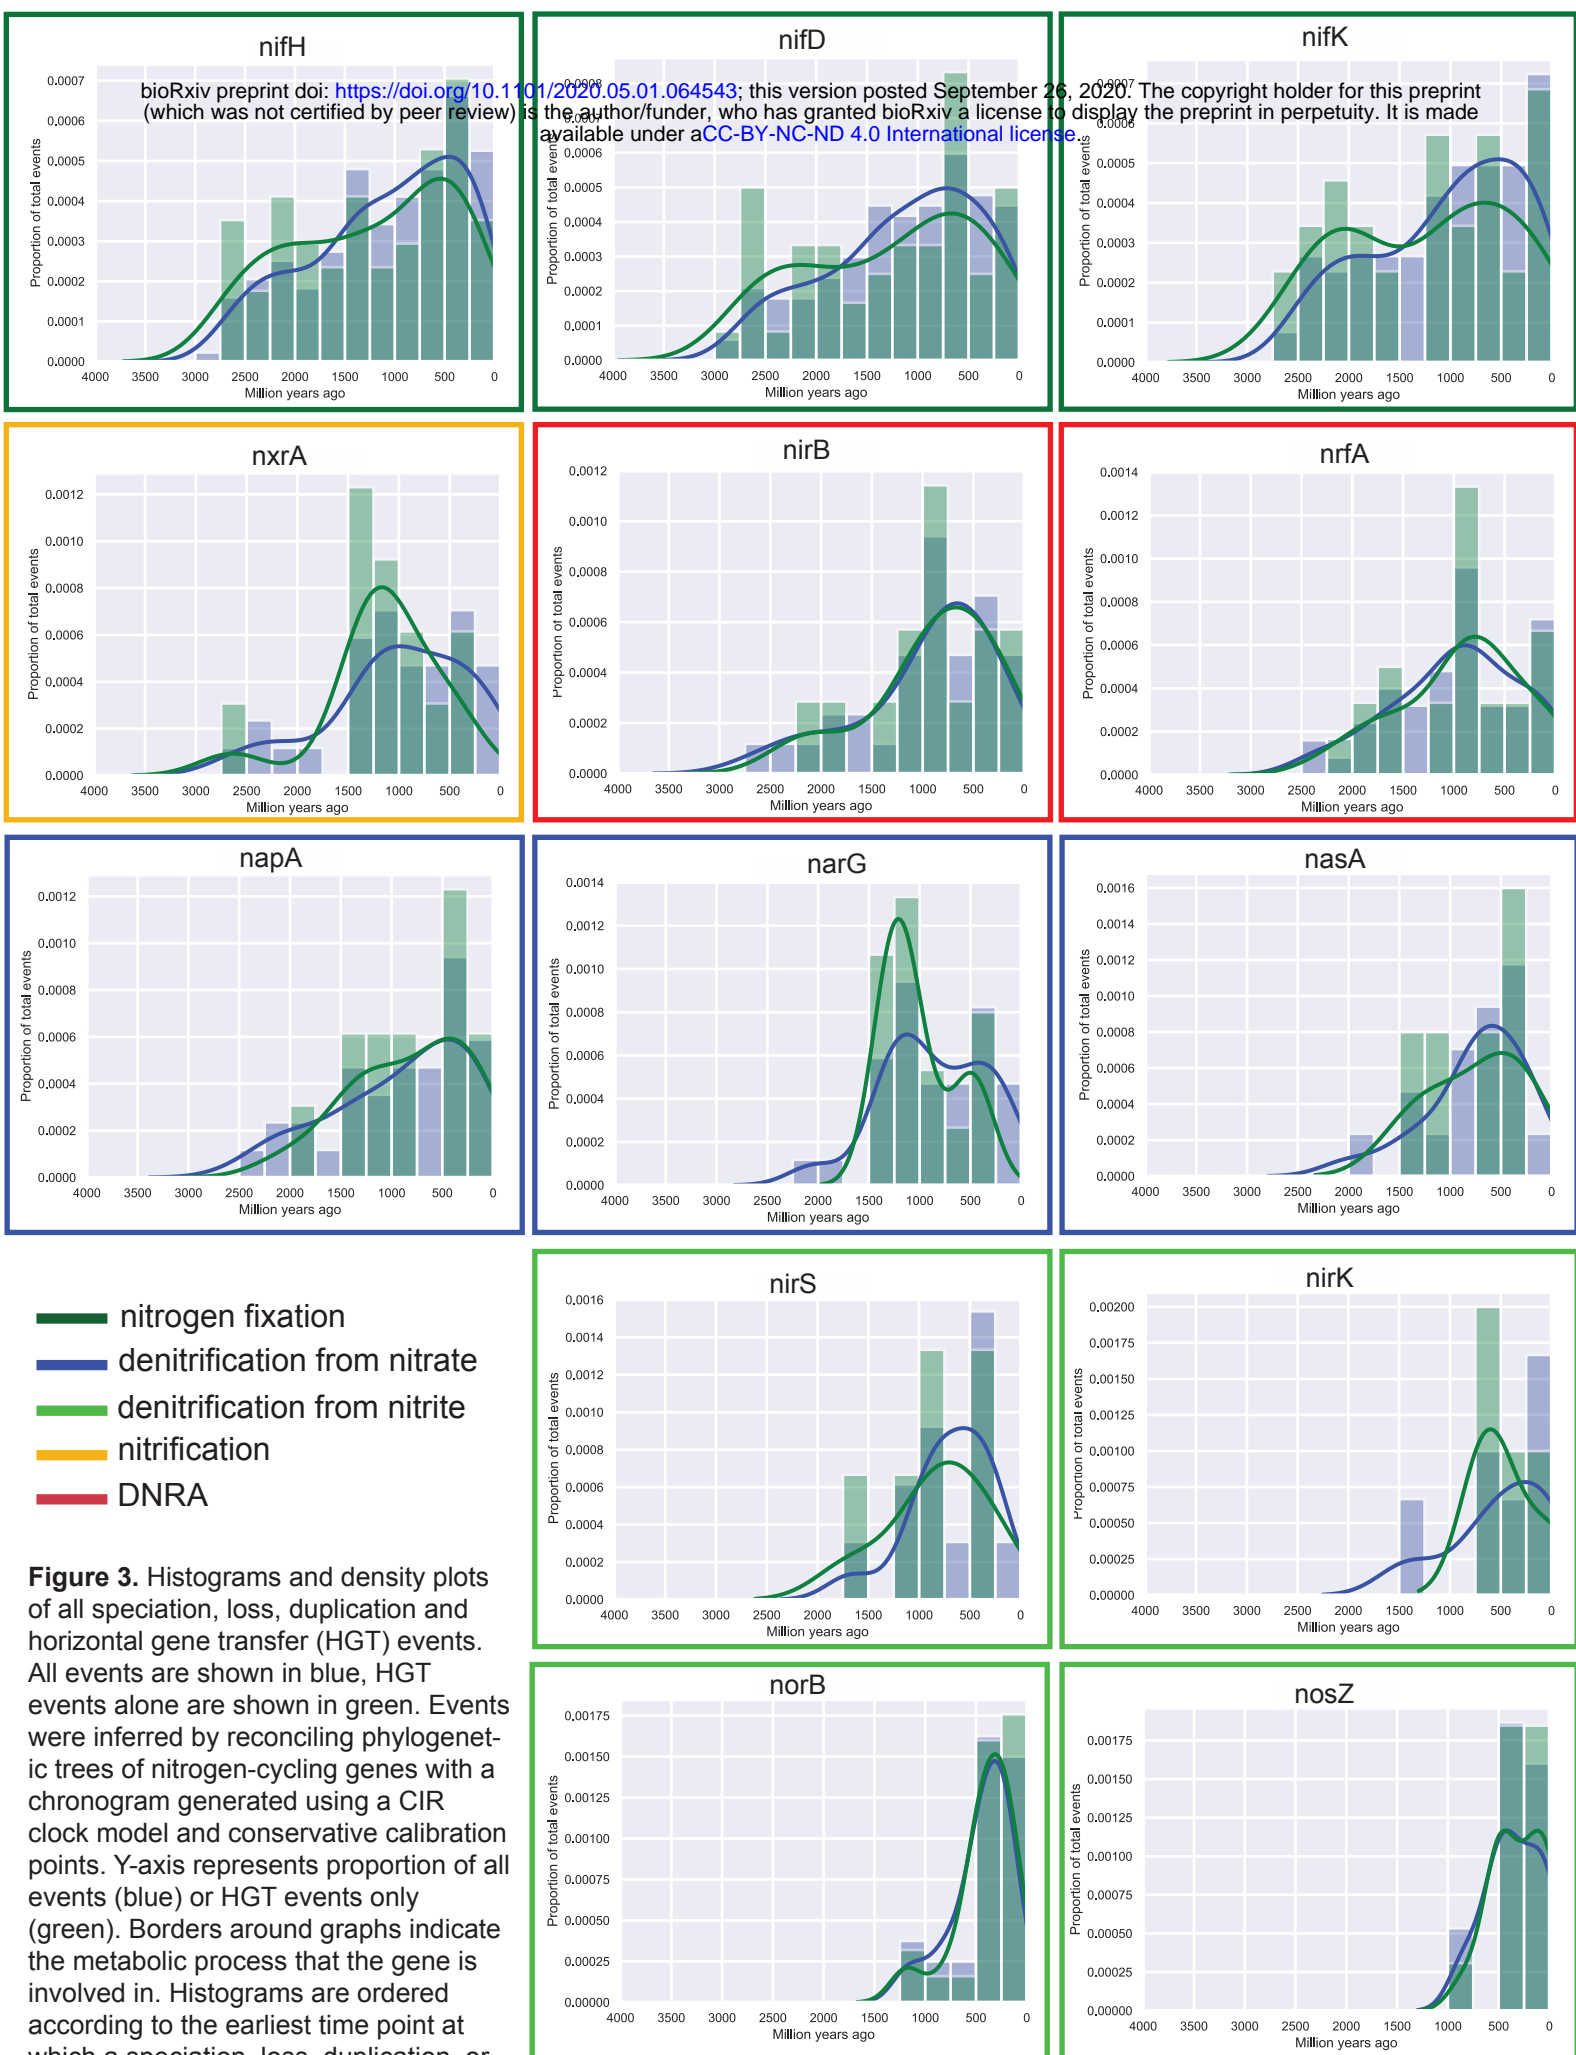

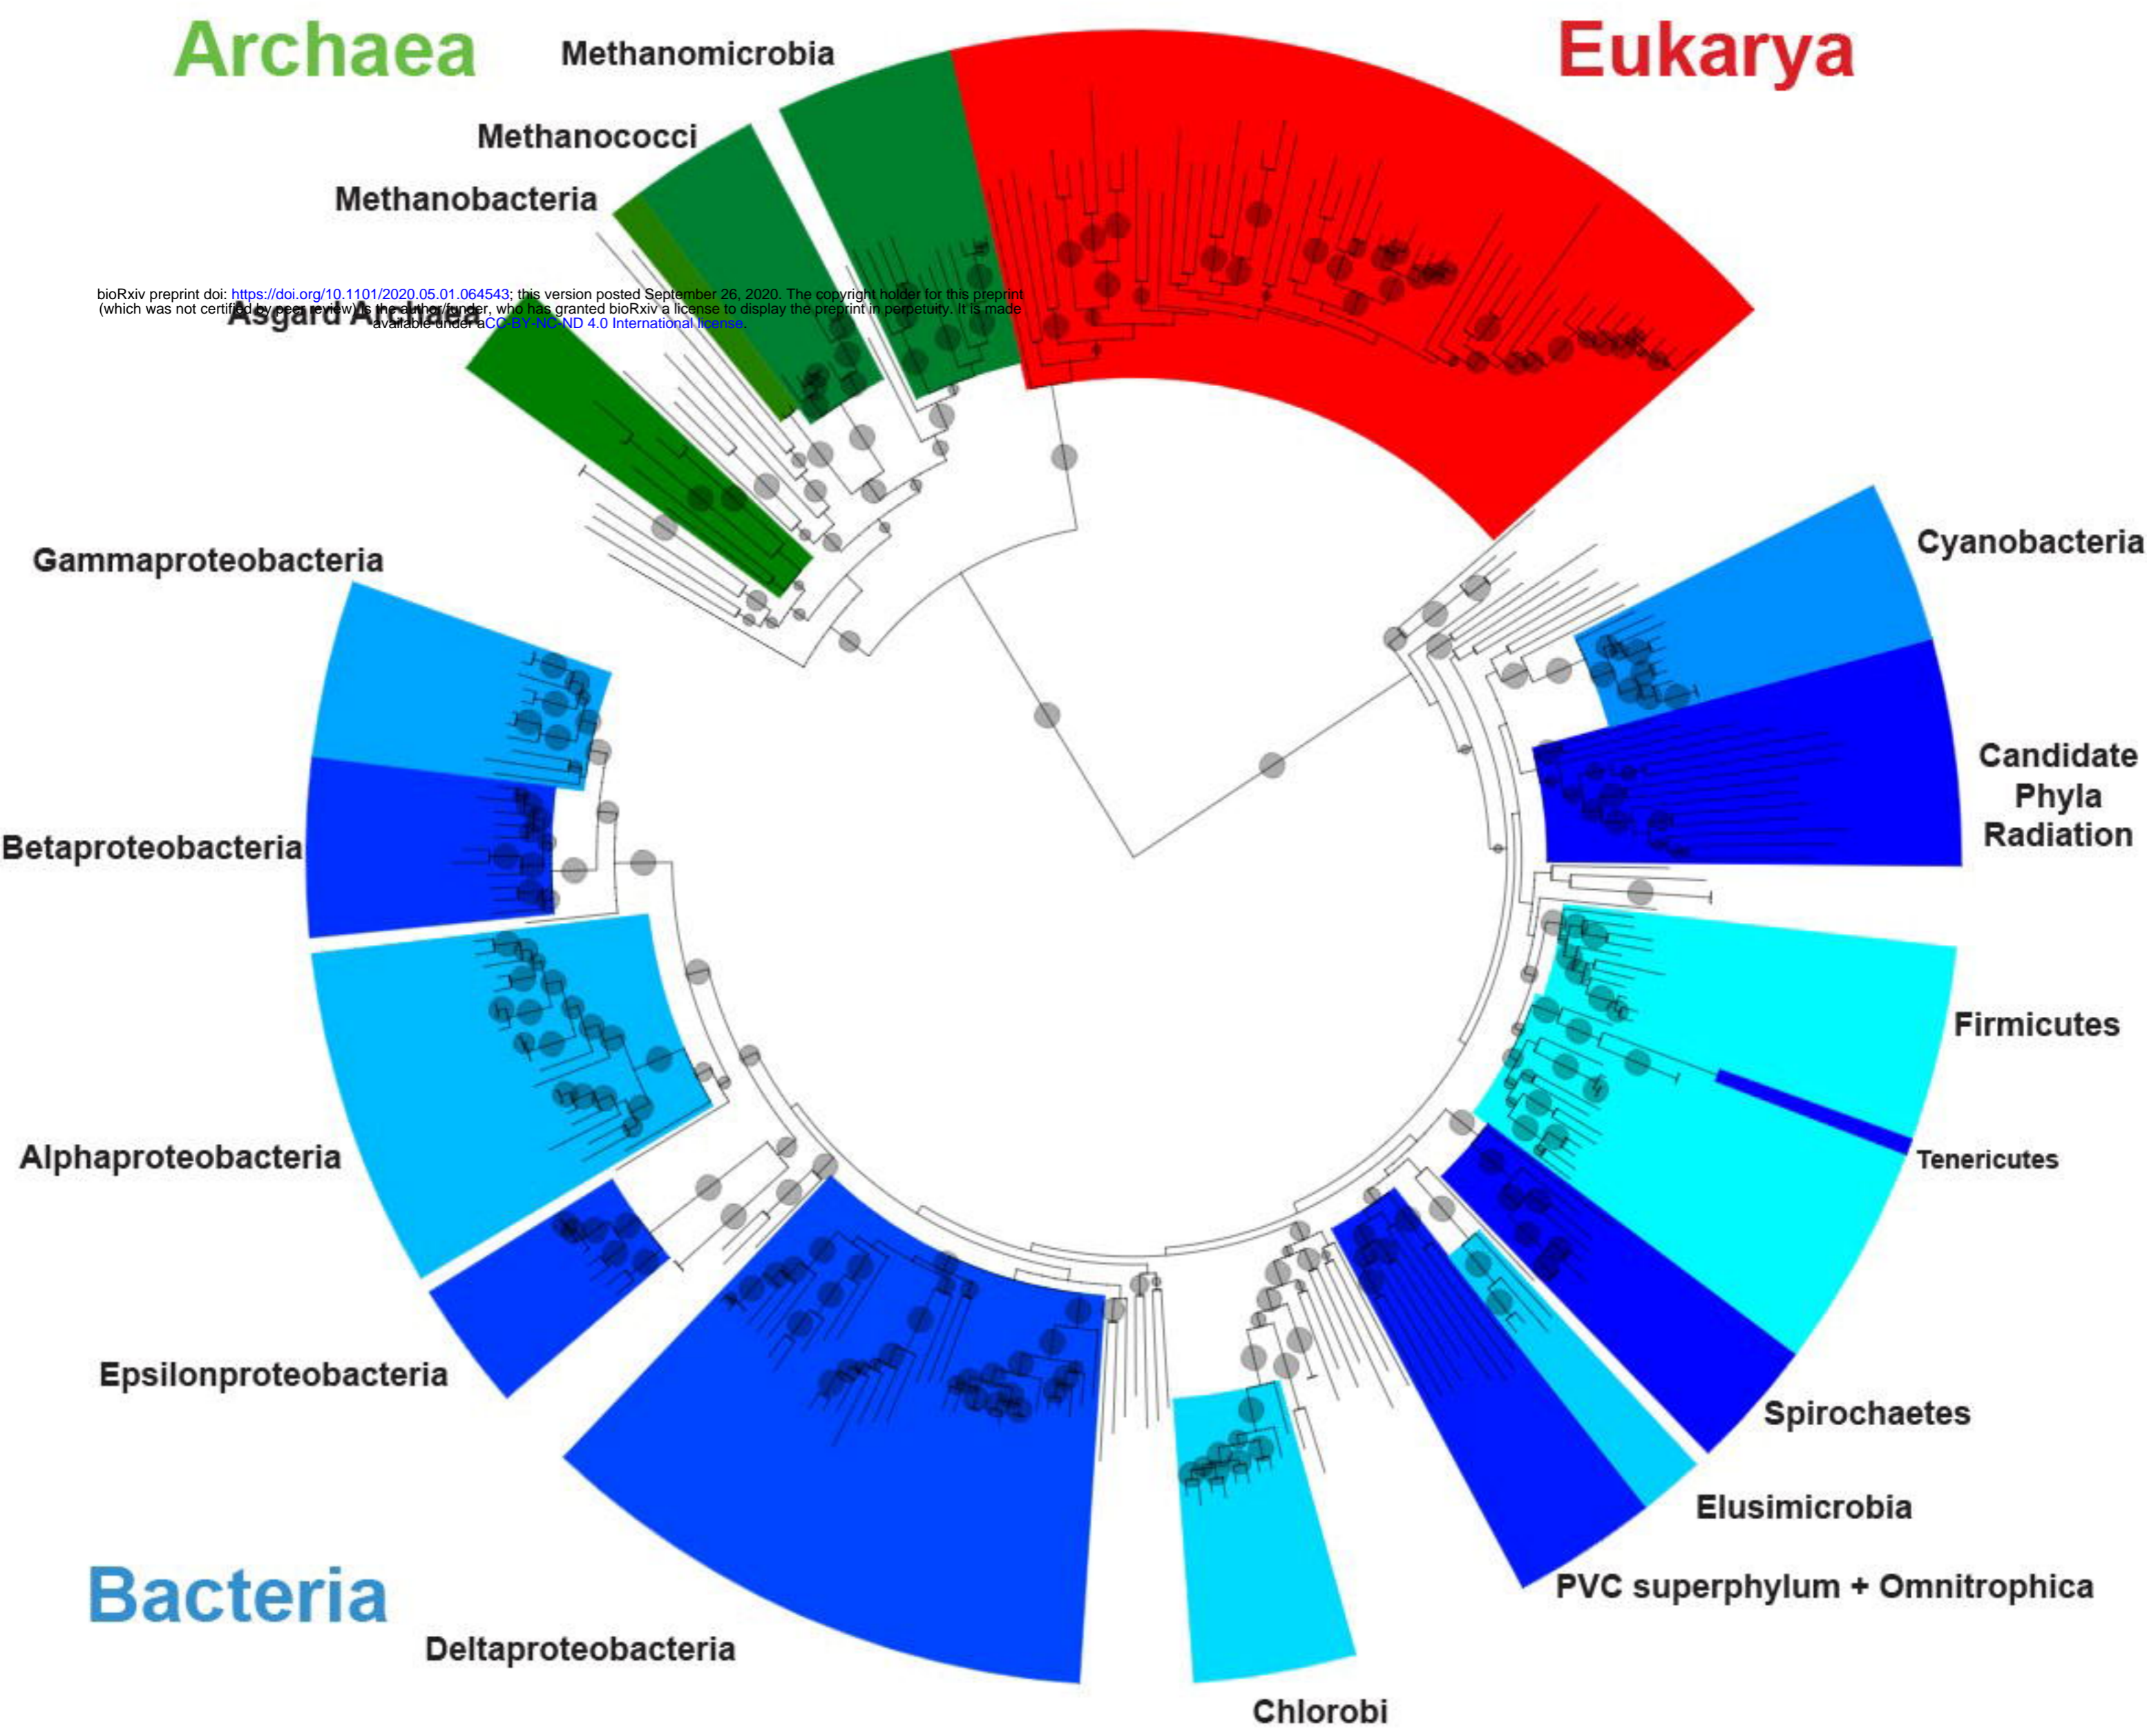

Source: https://www.biorxiv.org/content/10.1101/2020.05.01.064543v3.full.pdf
